# Supplementary material for: Emergency medicine physician supervision and mortality among patients receiving care from non-physician clinicians in a task-sharing model of emergency care in rural Uganda: a retrospective analysis of a single-centre training programme
Source: PubMed Central journal article supplement — BMJ Open. 2022 Jun 29;12(6):e059859. doi: 10.1136/bmjopen-2021-059859 (PMC9244677; doi:10.1136/bmjopen-2021-059859), 2022-06-29
Supplement: bmjopen-2021-059859.draft_revisions.pdf [file bmjopen-2021-059859.draft_revisions.pdf]

# BMJ Open

BMJ Open is committed to open peer review. As part of this commitment we make the peer review history of every article we publish publicly available.

When an article is published we post the peer reviewers' comments and the authors' responses online. We also post the versions of the paper that were used during peer review. These are the versions that the peer review comments apply to.

The versions of the paper that follow are the versions that were submitted during the peer review process. They are not the versions of record or the final published versions. They should not be cited or distributed as the published version of this manuscript.

BMJ Open is an open access journal and the full, final, typeset and author-corrected version of record of the manuscript is available on our site with no access controls, subscription charges or pay-per-view fees (<http://bmjopen.bmj.com>).

If you have any questions on BMJ Open's open peer review process please email [info.bmjopen@bmj.com](mailto:info.bmjopen@bmj.com)

# BMJ Open

## Mortality Outcomes in Task-Sharing for Emergency Care: Impact of Emergency Physician Supervision on Non-Physician Emergency Care in Rural Uganda

|                               |                                                                                                                                                                                                                                                                                                                                                                                                                                                                                                                                                                                                                                                                                                                                                                                               |
|-------------------------------|-----------------------------------------------------------------------------------------------------------------------------------------------------------------------------------------------------------------------------------------------------------------------------------------------------------------------------------------------------------------------------------------------------------------------------------------------------------------------------------------------------------------------------------------------------------------------------------------------------------------------------------------------------------------------------------------------------------------------------------------------------------------------------------------------|
| Journal:                      | <i>BMJ Open</i>                                                                                                                                                                                                                                                                                                                                                                                                                                                                                                                                                                                                                                                                                                                                                                               |
| Manuscript ID                 | bmjopen-2021-059859                                                                                                                                                                                                                                                                                                                                                                                                                                                                                                                                                                                                                                                                                                                                                                           |
| Article Type:                 | Original research                                                                                                                                                                                                                                                                                                                                                                                                                                                                                                                                                                                                                                                                                                                                                                             |
| Date Submitted by the Author: | 05-Jan-2022                                                                                                                                                                                                                                                                                                                                                                                                                                                                                                                                                                                                                                                                                                                                                                                   |
| Complete List of Authors:     | Rice, Brian; Stanford University, Emergency Medicine<br>Pickering, Ashley; University of Maryland Medical Center, Emergency Medicine<br>Laurence, Colleen; University of Cincinnati College of Medicine<br>Department of Emergency Medicine<br>Kizito, Prisca; Mbarara University of Science and Technology; Mbarara Regional Referral Hospital<br>Leff, Rebecca ; Mayo Clinic College of Medicine and Science<br>Kisingiri, Steven; Global Emergency Care; Liverpool John Moores University<br>Ndyamwijuka, Charles; Global Emergency Care<br>Nakato, Serena; Global Emergency Care; Karoli Lwanga Hospital<br>Adriko, Lema; Karoli Lwanga Hospital<br>Bisanzo, Mark; University of Vermont College of Medicine<br>Investigators, Global Emergency Care Collaborative; Global Emergency Care |
| Keywords:                     | Health policy < HEALTH SERVICES ADMINISTRATION & MANAGEMENT, Public health < INFECTIOUS DISEASES, ACCIDENT & EMERGENCY MEDICINE, MEDICAL EDUCATION & TRAINING, TRAUMA MANAGEMENT, HEALTH SERVICES ADMINISTRATION & MANAGEMENT                                                                                                                                                                                                                                                                                                                                                                                                                                                                                                                                                                 |
|                               |                                                                                                                                                                                                                                                                                                                                                                                                                                                                                                                                                                                                                                                                                                                                                                                               |

SCHOLARONE™  
Manuscripts

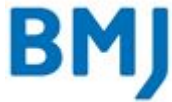

I, the Submitting Author has the right to grant and does grant on behalf of all authors of the Work (as defined in the below author licence), an exclusive licence and/or a non-exclusive licence for contributions from authors who are: i) UK Crown employees; ii) where BMJ has agreed a CC-BY licence shall apply, and/or iii) in accordance with the terms applicable for US Federal Government officers or employees acting as part of their official duties; on a worldwide, perpetual, irrevocable, royalty-free basis to BMJ Publishing Group Ltd ("BMJ") its licensees and where the relevant Journal is co-owned by BMJ to the co-owners of the Journal, to publish the Work in this journal and any other BMJ products and to exploit all rights, as set out in our [licence](#).

The Submitting Author accepts and understands that any supply made under these terms is made by BMJ to the Submitting Author unless you are acting as an employee on behalf of your employer or a postgraduate student of an affiliated institution which is paying any applicable article publishing charge ("APC") for Open Access articles. Where the Submitting Author wishes to make the Work available on an Open Access basis (and intends to pay the relevant APC), the terms of reuse of such Open Access shall be governed by a Creative Commons licence – details of these licences and which [Creative Commons](#) licence will apply to this Work are set out in our licence referred to above.

Other than as permitted in any relevant BMJ Author's Self Archiving Policies, I confirm this Work has not been accepted for publication elsewhere, is not being considered for publication elsewhere and does not duplicate material already published. I confirm all authors consent to publication of this Work and authorise the granting of this licence.

# Mortality Outcomes in Task-Sharing for Emergency Care: Impact of Emergency Physician Supervision on Non-Physician Emergency Care in Rural Uganda

Co-Frist: Brian Rice MDCM, MSc, DTM&H<sup>1,2</sup> and Ashley Pickering MD, MPH<sup>2,3</sup>, Colleen Laurence MD, MPH<sup>4</sup>, Prisca Mary Kizito MBChB, EA-DTM&H, MMED EM<sup>5,6,7,8</sup>, Rebecca Leff MD<sup>9</sup>, Steven Jonathan Kisingiri MBA<sup>2,10</sup>, Charles Ndyamwijuka MSM&E<sup>2</sup>, Serena Nakato<sup>2,11</sup>, Lema Felix Adriko MBChB, MMED OBS/GYN<sup>11</sup>, Mark Bisanzo MD, DTM&H<sup>2,12</sup>, on behalf of the Global Emergency Care Collaborative Investigators

Global Emergency Care Collaborative Investigators: **Mark Bisanzo, Heather Hammerstedt, Stacey Chamberlain and Bradley Dreifuss**

1. Stanford University
2. Global Emergency Care
3. University of Maryland School of Medicine
4. University of Cincinnati College of Medicine
5. Mbarara University of Science and Technology
6. Mbarara Regional Referral Hospital
7. International Hospital Kampala
8. Emergency Care Society of Uganda
9. Mayo Clinic College of Medicine and Science
10. Liverpool John Moores University
11. Karoli Lwanga Hospital
12. The University of Vermont Larner College of Medicine

Corresponding Author:

Ashley Pickering, MD, MPH  
University of Maryland Medical Center  
Department of Emergency Medicine  
110 S. Paca St, Suite 600  
Baltimore, MD 21201  
[AshleyPickering@gmail.com](mailto:AshleyPickering@gmail.com)

**Word Count:** 3890

1  
2  
3  
4  
5  
6  
7  
8  
9  
10  
11  
12  
13  
14  
15  
16  
17  
18  
19  
20  
21  
22  
23  
24  
25  
26  
27  
28  
29  
30  
31  
32  
33  
34  
35  
36  
37  
38  
39  
40  
41  
42  
43  
44  
45  
46  
47  
48  
49  
50  
51  
52  
53  
54  
55  
56  
57  
58  
59  
60

**Keywords:**  
Low- and Middle-Income Countries  
Uganda  
Emergency Care  
Task-Sharing  
Emergency care training  
Emergency Care Patient Mortality  
Quality Assurance  
Nonphysician Clinician  
Nonphysician Clinician Training  
Nonphysician Clinician Supervision  
Nonphysician Clinician Mortality Outcomes

For peer review only

## ABSTRACT

### Objectives

Emergency care capacity is limited by physician shortages in low-income countries like Uganda. Delegating tasks to more narrowly trained cadres — “Task-sharing” — of non-physician clinicians is a proposed solution. This study assesses whether different levels of emergency medicine physician supervision of non-physician clinician care impact three-day mortality.

### Methods

Retrospective analysis of an emergency care non-physician clinician training program in rural Uganda included three cohorts: “Direct Supervision” (2009-2010): emergency medicine physicians supervised all non-physician clinician care; “Indirect Supervision” (2010-2015): non-physician clinicians consulted emergency medicine physicians as needed; “Independent Care” (2015-2019): non-physician clinician care without emergency medicine physician supervision. Multivariable logistic regression analysis of three-day mortality was performed with patients stratified by supervision cohorts and abnormal vital signs.

### Results

38,344 ED visits met inclusion criteria. Overall mortality was significantly lower in the “Independent Care” than the “Direct Supervision” cohort (2.7% vs. 3.8%,  $p < 0.001$ ), but so too were the rates of patients presenting with  $\geq 3$  abnormal vitals (10.2% vs. 25.2% to  $p < 0.001$ ). After controlling for the mortality associated with abnormal vitals, both “Indirect Supervision” and “Independent Care” were independently associated with increased mortality compared to “Direct Supervision” (Indirect Odds Ratio (OR)=1.49 [95%CI 1.07 - 2.09], Independent OR=1.76 [95%CI 1.09 - 2.86]). Sensitivity analysis showed that this mortality benefit was

1  
2  
3 restricted to the 13.8% of patients with  $\geq 3$  abnormal vitals, with all other patients showing no  
4  
5 significant independent association between supervision cohort and mortality.  
6

## 7 8 **Conclusion**

9  
10 Direct emergency medicine physician supervision of emergency care non-physician clinicians is  
11  
12 independently associated with reduced overall mortality. This benefit appears restricted to the  
13  
14 highest risk patients based on abnormal vitals. That over 85% of patients have equivalent  
15  
16 mortality outcomes with independent non-physician clinician emergency care suggests a  
17  
18 synergistic model providing variable levels of emergency medicine physician supervision and  
19  
20 care based on acuity could safely address staffing shortages.  
21  
22  
23  
24  
25

## 26 **STRENGTHS AND LIMITATIONS OF THIS STUDY**

- 27  
28  
29 • Data from the largest and longest standing emergency care patient database with  
30  
31 mortality outcomes, as well as only database of emergency care outcomes for non-  
32  
33 physician clinician care, published to date in Africa.  
34  
35  
36  
37  
38
- 39 • The transition from physician supervision to independent non-physician clinician care  
40  
41 generates a unique natural experiment.  
42  
43  
44
- 45 • This is a single site study conducted at a rural, district-level hospital.  
46  
47  
48
- 49 • Patient-level physician supervision data is lacking.  
50  
51
- 52 • The logistic regression imperfectly controls for changing baseline of population health  
53  
54  
55  
56 during the study period.  
57  
58  
59  
60

## INTRODUCTION

Global recognition of the need to develop emergency care is growing. (1,2) In low- and middle-income countries LMICs, physician shortages make the provision of medical care and in particular emergency care problematic, with the greatest challenge centered in Sub-Saharan Africa. (3–5) Emergency care needs remain largely unmet throughout many LMICs, including Uganda. (5–8) Based on the estimate that 57% of deaths occurring in low-income countries are from conditions treatable with emergency care, approximately 160,000 Ugandans' lives could have been saved by provision of emergency care in 2019. (9,10) Emergency care in Uganda is largely limited by physician shortages, as there are 1.68 physicians per 10,000 people, amongst the lowest rates worldwide. (11). Uganda has placed a priority on developing emergency care over the next five years, estimating that 454 specialist emergency care physicians will be required by 2025. (12) Emergency care specialty training in Uganda began in 2017 and currently certifies between five and 10 Ugandan emergency medicine specialists per year.(13) This leaves an enormous training gap with 45 and 90 years of training needed to produce emergency medicine specialists to meet the projected five-year staffing demands.

One solution to address this shortage that has been widely advocated and implemented in SSA is “task-sharing,” or delegating tasks to more narrowly trained cadres of new or existing providers, often non-physician clinicians. (14–20) The World Health Organization advocates for non-physician clinicians that are “adequately trained, supported and supervised”. (18,19) Though non-physician clinicians are currently providing surgical specialty, obstetric, and HIV care throughout SSA (21–27), there has been limited application of non-physician clinician cadres to offset emergency care shortages. (20,28,29) High-income countries have compensated for regionally inadequate physician numbers and uneven distribution of emergency physicians by



1  
2  
3 adopting physician supervised non-physician clinicians in larger emergency units and in some  
4 cases non-physician clinician practice with remote physician supervision in smaller rural  
5 hospitals. (30–33) Data and protocols to guide implementation of emergency care non-physician  
6 clinician training and practice in LMICs, where emergency medicine is largely newly  
7 developing, and emergency medicine physicians are typically not available, is highly limited.  
8  
9

10  
11  
12  
13  
14  
15 Few articles exist addressing training of non-physician clinicians for roles in the African  
16 acute care settings outside of trainings focused on specific obstetric, surgical or anesthesia  
17 procedures (34–37), while others find that emergency and acute care training is lacking in non-  
18 physician clinician education in many SSA countries including Uganda. (34,38) While our  
19 research group has published on an emergency care non-physician clinician training program and  
20 its associated outcomes, we are not aware of any additional studies documenting a  
21 comprehensive emergency care non-physician clinicians training program in a LMIC. (29,39–44)  
22  
23 There are documentation a few short-courses designed to teach non-physician clinicians  
24 emergency care skills in SSA. (45–48) Consistent with this limited evidence base, no standards  
25 exist describing if, when or how to transition to reduced supervision or independent non-  
26 physician clinician care following initial training. The impact of transitioning to decreased levels  
27 of supervision on quality of non-physician clinician care and patient outcomes is therefore  
28 unknown. This represents a major limitation in the ability to implement non-physician clinician  
29 training, supervision and uptake into health systems in a safe, effective and evidence-based  
30 manner.  
31  
32  
33  
34  
35  
36  
37  
38  
39  
40  
41  
42  
43  
44  
45  
46  
47  
48

49 While health systems are evolving in Uganda over the last decade so too is the health of  
50 the general population. Uganda's national crude death rates decreased by 63% across all age  
51 groups (10.2/1000 in 2009 to 6.4/1000 persons in 2019) during the study period. (49) Likewise,  
52  
53  
54  
55  
56  
57  
58  
59

1  
2  
3 under-five mortality decreased by approximately 38,000 deaths per year (112,747 in 2009 to  
4 74,053 in 2019). (49) Concurrently, life expectancy increased by 6.8 years and rates of malaria  
5 and HIV infection decreased. (49)  
6  
7  
8  
9

10 Emergency care has been delivered by non-physician clinicians in Uganda since 2009 in  
11 a training program that has transitioned from directly supervised to independent non-physician  
12 clinician care. The objective of this study was to test the hypothesis that increasing levels of  
13 emergency medicine physician supervision for three cohorts of non-physician clinicians were  
14 independently associated with reduced three-day patient mortality. Sensitivity analysis was  
15 performed to attempt to define which patients had mortality outcomes impacted by physician  
16 supervision.  
17  
18  
19  
20  
21  
22  
23  
24  
25  
26  
27

## 28 **METHODS**

### 29 **Description of Study Site**

30  
31 All data comes from the emergency unit at Karoli Lwanga Hospital, a rural district  
32 hospital located in the town of Nyakibale in the Rukungiri District of southwest Uganda. The  
33 hospital has a six-bed emergency unit that opened in 2008 and treats 300 to 700 patients per  
34 month arriving between 8:00 am and midnight every day of the year. Since 2009, the emergency  
35 unit has been staffed by non-physician clinicians who received training from emergency  
36 medicine physicians working with Global Emergency Care. The non-physician clinicians are  
37 nurses who have completed a two-year advanced training course in emergency care described in  
38 detail elsewhere by Hammerstedt et al (29). While the course is currently administered in  
39 conjunction with Mbarara University of Science and Technology, the non-physician clinicians in  
40 this cohort study were trained as part of the pilot program that began through a collaboration  
41  
42  
43  
44  
45  
46  
47  
48  
49  
50  
51  
52  
53  
54  
55  
56  
57  
58  
59  
60

1  
2  
3 between GEC and Karoli Lwanga Hospital. Global Emergency Care (GEC), a US-based 501(c)  
4 [3] non-governmental organization, has run a two-year emergency care specialty non-physician  
5  
6 clinician training program since 2009, and currently does so in collaboration with Mbarara  
7  
8 University of Science and Technology (MUST).  
9  
10

11  
12       Supervision of the non-physician clinicians changed over time generating three cohorts:  
13  
14 “Direct Supervision”, “Indirect Supervision” and “Independent Care”. “Direct Supervision”  
15  
16 occurred from November 2009 - April 2010 when a single US-trained emergency medicine  
17  
18 physician practicing with a Ugandan license was on site every day and directly supervised non-  
19  
20 physician clinician care and supplemented with clinical care in a model similar to US residency  
21  
22 training. “Indirect Supervision” occurred from July 2010 - November 2015. During this period a  
23  
24 volunteer US-trained emergency medicine physician was on site for approximately 85% of the  
25  
26 weeks; however, they were present in a teaching role only and provided no direct patient care.  
27  
28 They were available for consultation on an ad hoc basis and consultation was based on non-  
29  
30 physician clinician discretion. “Independent Care” occurred from December 2015 - December  
31  
32 2019, and non-physician clinicians provided clinical care without any onsite emergency  
33  
34 medicine physician. During the entire study period, no Ugandan physicians were assigned to the  
35  
36 emergency unit. Hospital physicians were available in a similar manner throughout the study  
37  
38 period for consultation for patients who required surgery, did not respond to initial treatments, or  
39  
40 in whom there was considerable diagnostic uncertainty. Throughout the study period, non-  
41  
42 physician clinicians admitted patients to the same hospital medical and surgical wards, which  
43  
44 were staffed by Ugandan physicians with standard levels of training and no connection to GEC.  
45  
46 Resource availability was constant over the study period and with resource utilization by  
47  
48 clinicians in this emergency unit described in detail elsewhere. (39)  
49  
50  
51  
52  
53  
54  
55  
56  
57  
58  
59  
60

## Patient and Public Involvement

The non-physician clinician training program was originally developed in response to several years of clinical emergency medicine experience and ongoing healthcare staffing shortages in Uganda. The positive response of patients, staff and administrators at Karoli Lwanga Hospital to the training program and their interest in improving patient care led to ongoing research and program evaluation. Patients and the public were not involved in the design of the study; however, outcome measures are explicitly patient-oriented. Results have been and will continue to be disseminated through open access publications to allow local clinicians, administrators, policymakers and researchers to benefit.

## Data Collection

GEC maintained a group of trained research associates who prospectively collected quality assurance data on all Karoli Lwanga Hospital emergency unit patient visits. Collected data included demographics, vital signs, laboratory and radiology testing, disposition, as well as three-day follow-up vital status (mortality) for all admitted and discharged patients. On the third day following initial evaluation in the emergency unit, patients admitted to the hospital were visited in person, and patients discharged from the emergency unit or ward were contacted via phone. This follow-up protocol included seven consecutive days of calling all patients on the phone (if they had a phone) before considering them lost to follow-up and is described in detail elsewhere. (29) Ethics approval for the quality assurance database and waiver of consent was obtained through the Institutional Review Board at Mbarara University of Science and Technology (No. 11/08-12). Trained research assistants entered data using Microsoft Excel from 1 January 2010 – 23 March 2012, and Microsoft Access from 24 March 2012 – 31 December 2019.

## Data Analysis

A cohort study was done using retrospective analysis of prospectively collected data abstracted from the Karoli Lwanga Hospital emergency unit quality assurance database, including all consecutive patients presenting to the emergency unit from November 2009 until December 2019. All patients missing age, gender, disposition and three-day follow up were excluded from analysis. Patients who were dead on arrival (lacked vital signs with no resuscitation or interventions attempted) and patients who were transferred or left against medical advice did not receive follow-up by protocol and thus were also excluded from analysis. All other patients of all ages and dispositions were included. Vital signs were taken for all patients, but the inconsistent availability of pediatric sphygmomanometers meant that blood pressures were missing for 89% of children under 5 and 47% of children aged 5-12, as compared to 3% missing in all other age groups. To control for this effect, all patients aged 12 or less that had missing blood pressure were coded as normal for analysis. No other missing variables were coded as normal, and no other data was imputed. Data was abstracted, cleaned, and analyzed by a single researcher (BR) using Stata 16.1 (StataCorp, College Station, TX). No power or sample size calculations were performed as all available records were included in analysis.

Continuous variables were tested for significance using one-way ANOVA and proportions were compared using chi-squared. A multiple variable logistic regression model was developed to test the significance of associations between independent variables and mortality in emergency unit patients. Because only two months of data existed for 2009, and three months of data were missing for 2010, the years 2009 and 2010 were both coded as 2010 for the continuous “Year” variable included in that model. Eleven variables were included for the final model meeting the minimal criterion of ten events per variable (n=1,119 events overall).(50) Area

Under Receiver Operating Characteristics Curve (AUROC), Hosmer-Lemeshow Goodness of Fit, and Brier score were all calculated for this model.

## RESULTS

Overall, 49,804 patient visits occurred from 2009 - 2019, and 38,344 met criteria for inclusion for analysis. Inclusion and exclusion criteria are shown in Figure 1 below.

### Figure 1: Patient Flow Diagram

Patient characteristics stratified by cohorts of patients receiving non-physician emergency care with different levels of emergency medicine physician supervision (as described in Methods above) are shown in Table 1 below.

| Table 1: Patient Characteristics                      |                                    |                                       |                                   |          |
|-------------------------------------------------------|------------------------------------|---------------------------------------|-----------------------------------|----------|
| Characteristic                                        | Direct Supervision Cohort (n=2017) | Indirect Supervision Cohort (n=21210) | Independent Care Cohort (n=15111) | P-value  |
| Age, mean (SD)                                        | 25.8 (23.2)                        | 28.8 (24.1)                           | 32.9 (24.9)                       | < 0.001* |
| Age Group                                             |                                    |                                       |                                   |          |
| Under 5, % (n)                                        | 25.8% (521)                        | 21.0% (4446)                          | 14.5% (2193)                      | < 0.001  |
| 5-12 y.o., % (n)                                      | 7.4% (149)                         | 7.7% (1622)                           | 7.3% (1103)                       |          |
| 12-18 y.o., % (n)                                     | 8.2% (165)                         | 8.3% (1750)                           | 7.4% (1112)                       |          |
| 18-64 y.o., % (n)                                     | 49.6% (1000)                       | 51.9% (11004)                         | 56.6% (8550)                      |          |
| > = 65 y.o., % (n)                                    | 9.0% (182)                         | 11.3% (2394)                          | 14.3% (2153)                      |          |
| HIV-positive (known status or newly diagnosed), % (n) | 1.7% (35)                          | 5.6% (1185)                           | 6.9% (1047)                       | < 0.001  |
| Malaria parasites on blood smear, % (n)               | 22.8% (460)                        | 18.4% (3898)                          | 5.6% (846)                        | < 0.001  |
| Gender - Female, % (n)                                | 46.5% (939)                        | 46.1% (9789)                          | 46.6% (7047)                      | 0.64     |

|                                                                |              |               |               |        |
|----------------------------------------------------------------|--------------|---------------|---------------|--------|
| <b>Complete Vital Signs, %(n)</b>                              | 87.2% (1758) | 87.5% (18571) | 90.3% (13652) | <0.001 |
| <b>Vital Sign Abnormalities</b>                                |              |               |               |        |
| Hypoxia, % (n)                                                 | 12.4% (250)  | 11.9% (2524)  | 12.7% (1917)  | 0.84   |
| Tachypnea, % (n)                                               | 51.3% (1035) | 43.1% (9140)  | 27.7% (4185)  | <0.001 |
| Bradycardia, % (n)                                             | 1.8% (37)    | 4.0% (856)    | 4.5% (673)    | <0.001 |
| Tachycardia, % (n)                                             | 31.3% (632)  | 18.3% (3888)  | 15.2% (2303)  | <0.001 |
| Hypothermia, % (n)                                             | 35.9% (724)  | 27.4% (5806)  | 29.4% (4448)  | <0.001 |
| Febrile, % (n)                                                 | 21.1% (426)  | 15.6% (3300)  | 13.6% (2052)  | <0.001 |
| Hypotension, % (n)                                             | 19.6% (396)  | 11.9% (2533)  | 7.9% (1191)   | <0.001 |
| <b>Number of abnormal vital signs</b>                          |              |               |               |        |
| 0 or 1, % (n)                                                  | 46.2% (932)  | 61.3% (13001) | 69.0% (10429) | <0.001 |
| 2, % (n)                                                       | 28.6% (577)  | 23.4% (4968)  | 20.8% (3136)  |        |
| 3 or more, % (n)                                               | 25.2% (508)  | 15.3% (3247)  | 10.2% (1546)  |        |
| * ANOVA used for significance test; all others use chi-squared |              |               |               |        |

There were significant differences in every characteristic across the cohorts except for gender and hypoxia. As the study progressed, fewer pediatric patients, more adult and elderly patients, fewer patients with malaria, more patients with HIV, more complete vital signs and fewer abnormal vital signs were present. The rates of missing vital sign data were: blood pressure 2.0%, respiratory rate 4.9%, pulse oximetry 5.7%, heart rate 1.6%, and temperature 2.1%.

The overall three-day mortality across the program from 2009-2019 was 3.1% (1,199 deaths overall). Overall, mortality increased significantly ( $p < 0.001$ ) and monotonically based on the number of abnormal vital signs patients had on presentation from zero or one (1.31%,  $n = 319$  deaths in 24,362 patients), to two (3.97%,  $n = 345$  deaths in 8,681 patients) to three or more (10.1%,  $n = 535$  deaths in 5,301 patients). A clear trend towards lower mortality and a lower

1  
2  
3 proportion of patients presenting with abnormal vital signs existed over time and is shown in  
4  
5 Figure 2.

### 8 **Figure 2: Mortality and vital sign abnormalities 2009 - 2019**

9  
10 Crude mortality decreased significantly across supervision cohorts (“Direct Supervision”:  
11 3.8%, “Indirect Supervision”: 3.4%, “Independent Care”: 2.7%,  $p < 0.001$ ). Conversely, the  
12 proportion of patients presenting with zero abnormal vitals increased across supervision cohorts  
13 and those presenting with three or more abnormal vital signs decreased (values in Table 1,  
14 visualized in Figure 2).

15  
16  
17 Unadjusted mortality across supervision cohorts was stratified by the number of  
18 abnormal vital signs is displayed visually in Figure 3 below (values in Appendix 1).

### 21 **Figure 3: Mortality stratified by number of abnormal vital signs across supervision cohorts**

22  
23  
24 As illustrated in Figure 3, the mortality for the “Indirect Supervision” and “Independent  
25 Care” cohorts were very similar, while “Direct Supervision” had higher mortality in patients with  
26 zero or one abnormal vital sign and lower mortality in patients with three or more abnormal vital  
27 signs. Confidence intervals were wide, but both differences (increased and decreased mortality)  
28 achieved statistical significance (see Appendix 1).

29  
30  
31 Given the changing baseline in patient mortality and prevalence of vital sign  
32 abnormalities, a logistic regression model was developed to determine whether physician  
33 supervision of non-physician clinician care was independently associated with increased or  
34 decreased mortality for emergency unit patients. The results of this model are displayed in Table  
35  
36  
37  
38  
39  
40  
41  
42  
43  
44  
45  
46  
47  
48  
49  
50  
51  
52  
53  
54  
55  
56  
57  
58  
59  
60  
2 below.



1  
2  
3  
4  
5  
6  
7  
8  
9  
10  
11  
12  
13  
14  
15  
16  
17  
18  
19  
20  
21  
22  
23  
24  
25  
26  
27  
28  
29  
30  
31  
32  
33  
34  
35  
36  
37  
38  
39  
40  
41  
42  
43  
44  
45  
46  
47

| Characteristic                | All Patients (n=33,996) |        |        |         | Zero or One Abnormal Vital (n=21,096) |        |        | Two Abnormal Vitals (n=7,940) |      |        | Three or More Abnormal Vitals (n=4,960) |         |      |        |        |         |
|-------------------------------|-------------------------|--------|--------|---------|---------------------------------------|--------|--------|-------------------------------|------|--------|-----------------------------------------|---------|------|--------|--------|---------|
|                               | OR                      | 95% CI |        | P-Value | OR                                    | 95% CI |        | P-Value                       | OR   | 95% CI |                                         | P-Value | OR   | 95% CI |        | P-Value |
| <b>Age Group</b>              |                         |        |        |         |                                       |        |        |                               |      |        |                                         |         |      |        |        |         |
| Under 5                       | 1.23                    | 1.00   | - 1.52 | 0.046   | 1.32                                  | 0.87   | - 2.01 | 0.189                         | 1.73 | 1.19   | - 2.53                                  | 0.005   | 0.87 | 0.63   | - 1.19 | 0.377   |
| 5-12 y.o.                     | 0.79                    | 0.56   | - 1.10 | 0.16    | 0.94                                  | 0.49   | - 1.81 | 0.853                         | 1.07 | 0.58   | - 1.98                                  | 0.834   | 0.60 | 0.36   | - 1.00 | 0.048   |
| 12-18 y.o.                    | 0.49                    | 0.33   | - 0.74 | 0.001   | 0.55                                  | 0.25   | - 1.20 | 0.132                         | 0.29 | 0.11   | - 0.81                                  | 0.017   | 0.60 | 0.35   | - 1.05 | 0.074   |
| 18-64 y.o.                    | REF                     |        |        |         | REF                                   |        |        |                               | REF  |        |                                         |         | REF  |        |        |         |
| ≥65 y.o.                      | 1.58                    | 1.32   | - 1.90 | <0.001  | 2.84                                  | 1.98   | - 4.08 | <0.001                        | 1.74 | 1.25   | - 2.42                                  | 0.001   | 1.05 | 0.80   | - 1.37 | 0.748   |
| <b>HIV positive</b>           | 2.23                    | 1.80   | - 2.75 | <0.001  | 4.01                                  | 2.62   | - 6.13 | <0.001                        | 2.35 | 1.57   | - 3.53                                  | <0.001  | 1.65 | 1.23   | - 2.20 | 0.001   |
| <b>Malaria smear positive</b> | 0.98                    | 0.80   | - 1.19 | 0.81    | 1.45                                  | 0.98   | - 2.15 | 0.064                         | 1.21 | 0.85   | - 1.71                                  | 0.291   | 0.70 | 0.52   | - 0.94 | 0.019   |
| <b>Female gender</b>          | 0.68                    | 0.59   | - 0.79 | <0.001  | 0.65                                  | 0.49   | - 0.87 | 0.004                         | 0.64 | 0.50   | - 0.83                                  | 0.001   | 0.72 | 0.58   | - 0.88 | 0.001   |
| <b>Year</b>                   | 0.94                    | 0.90   | - 0.99 | 0.019   | 0.91                                  | 0.83   | - 1.01 | 0.079                         | 0.96 | 0.87   | - 1.05                                  | 0.343   | 0.95 | 0.89   | - 1.03 | 0.215   |
| <b>Vital Signs</b>            |                         |        |        |         |                                       |        |        |                               |      |        |                                         |         |      |        |        |         |
| <b>Hypoxic</b>                | 4.51                    | 3.90   | - 5.23 | <0.001  | 3.25                                  | 1.67   | - 6.33 | 0.001                         | 2.52 | 1.62   | - 3.91                                  | <0.001  | 3.37 | 2.62   | - 4.33 | <0.001  |
| <b>Tachypnea</b>              | 2.16                    | 1.85   | - 2.53 | <0.001  | 1.87                                  | 1.24   | - 2.82 | 0.003                         | 1.04 | 0.68   | - 1.58                                  | 0.858   | 2.07 | 1.47   | - 2.90 | <0.001  |
| <b>Heart Rate</b>             |                         |        |        |         |                                       |        |        |                               |      |        |                                         |         |      |        |        |         |
| Bradycardic                   | 2.20                    | 1.73   | - 2.80 | <0.001  | 0.97                                  | 0.23   | - 4.01 | 0.965                         | 1.10 | 0.63   | - 1.92                                  | 0.737   | 1.82 | 1.31   | - 2.53 | <0.001  |
| Normal                        | REF                     |        |        |         | REF                                   |        |        |                               | REF  |        |                                         |         | REF  |        |        |         |
| Tachycardic                   | 1.68                    | 1.41   | - 1.99 | <0.001  | 2.99                                  | 1.69   | - 5.31 | <0.001                        | 0.65 | 0.39   | - 1.08                                  | 0.097   | 1.34 | 1.04   | - 1.73 | 0.022   |
| <b>Temperature</b>            |                         |        |        |         |                                       |        |        |                               |      |        |                                         |         |      |        |        |         |
| Hypothermic                   | 2.22                    | 1.91   | - 2.58 | <0.001  | 2.20                                  | 1.50   | - 3.23 | <0.001                        | 1.25 | 0.80   | - 1.95                                  | 0.325   | 1.31 | 0.99   | - 1.74 | 0.059   |
| Normal                        | REF                     |        |        |         | REF                                   |        |        |                               | REF  |        |                                         |         | REF  |        |        |         |

|                         |      |             |        |      |             |       |      |             |       |      |             |        |
|-------------------------|------|-------------|--------|------|-------------|-------|------|-------------|-------|------|-------------|--------|
| Febrile                 | 0.81 | 0.66 - 1.01 | 0.06   | 1.67 | 0.86 - 3.26 | 0.131 | 0.52 | 0.30 - 0.88 | 0.016 | 0.50 | 0.37 - 0.69 | <0.001 |
| Hypotensive             | 2.01 | 1.71 - 2.37 | <0.001 | 1.49 | 0.59 - 3.78 | 0.398 | N/A  |             |       | 1.67 | 1.33 - 2.09 | <0.001 |
| Supervision Cohort      |      |             |        |      |             |       |      |             |       |      |             |        |
| Direct (2009-2010)      | REF  |             |        | REF  |             |       | REF  |             |       | REF  |             |        |
| Indirect (2010-2015)    | 1.49 | 1.07 - 2.09 | 0.019  | 1.12 | 0.54 - 2.33 | 0.768 | 1.17 | 0.65 - 2.11 | 0.601 | 1.75 | 1.08 - 2.85 | 0.024  |
| Independent (2015-2019) | 1.76 | 1.09 - 2.86 | 0.021  | 1.33 | 0.49 - 3.63 | 0.576 | 1.26 | 0.53 - 3.00 | 0.602 | 2.14 | 1.05 - 4.34 | 0.036  |

1  
2  
3  
4  
5  
6  
7 In this model, all abnormal vital signs, age < 1 year old and  $\geq 65$ , HIV positivity and  
8 male gender were all significantly associated with increased mortality. Female gender, year (as a  
9 continuous variable between 2009 and 2019) and age between 12 and 18 were associated with  
10 decreased mortality. After controlling for these factors, increased mortality was independently  
11 associated with “Indirect Supervision” (Odds Ratio (OR)=1.49 [95%CI 1.07 - 2.09], and  
12 “Independent Care” (OR=1.76 [95%CI 1.09 - 2.86]) as compared to “Direct Supervision”. This  
13 model was well-calibrated (brier score 0.025), discriminated well between patients at risk for our  
14 outcome of interest (death) (AUROC 0.81) and was not over-fitted (Hosmer-Lemeshow 0.28).  
15  
16  
17  
18  
19  
20  
21  
22  
23  
24

25 As a sensitivity analysis, we looked at patients grouped by number of abnormal vital  
26 signs (Table 2). Patients with zero, one or two abnormal vital signs had no significant mortality  
27 association between mortality and supervision cohorts. Patients with three or more abnormal  
28 vital signs had increased mortality associated with “Indirect Supervision” (OR=1.75 [95%CI  
29 1.08 - 2.85] or “Independent Care” (OR=2.14 [95%CI 1.05 - 4.34]) as compared to “Direct  
30 Supervision”.  
31  
32  
33  
34  
35  
36  
37  
38  
39  
40

## 41 **DISCUSSION**

42  
43 This study of a non-physician clinician emergency care training program in rural Uganda  
44 demonstrates that direct supervision by emergency medicine physicians of non-physician  
45 clinician emergency care was independently associated with reduced three-day mortality. This  
46 mortality impact was restricted to the most severely ill subset of patients – as defined by  
47 abnormal vitals – with independent non-physician clinician care having similar outcomes to care  
48 directly supervised by emergency medicine physicians for the vast majority of patients. These  
49  
50  
51  
52  
53  
54  
55  
56  
57  
58  
59  
60

1  
2  
3 findings are consistent with a prior study by our author group showing the mortality benefit for  
4 direct emergency medicine physician supervision was restricted to the most severely ill subset of  
5 children under 5 years of age (42). We are not aware of any other studies addressing mortality  
6 rates of patients cared for by emergency care specialty trained non-physician clinicians in similar  
7 LMIC settings. This finding has potentially profound implications for policy to maximize  
8 workforce potential in the rapidly developing field of emergency care in Uganda and in similar  
9 settings.

10  
11  
12  
13  
14  
15  
16  
17  
18  
19 One of the fundamental challenges of our analysis was the rapidly changing background  
20 of the health system in Uganda during the study period (2009-2019). Many of the most profound  
21 shifts seen in our study likely reflect the overall changes in Ugandan health care. As shown in  
22 Figure 2, overall mortality significantly ( $p < 0.001$ ) decreased by almost 70% during the study  
23 period. While impressive, this finding is consistent with the 63% reduction in national crude  
24 death rate during the study period (49). Similarly, we saw many demographic shifts in our  
25 population over time (Table 1) including fewer emergencies in children under 5, more elderly  
26 patients and reduced rates of malaria. Again, these are consistent with Ugandan national trends  
27 over that time period.(49) Figure 2 also showed an increasingly healthy patient population as  
28 defined by being more likely to have normal vital signs and less likely to have abnormal vital  
29 signs. The proportion of patients receiving complete vitals increased over time, so this effect is  
30 unlikely due to changing data collection but rather by population level trends in overall health  
31 and/or earlier emergency care-seeking behavior.

32  
33  
34  
35  
36  
37  
38  
39  
40  
41  
42  
43  
44  
45  
46  
47  
48  
49 Our initial attempts to control for these changing baselines was to group patients by their  
50 number of abnormal vital signs and mortality across cohorts (Figure 3). While this was an  
51 appealing approach given its simplicity, the findings were difficult to interpret with direct

1  
2  
3 physician supervision being associated with both significantly *decreased* mortality in the highest  
4 mortality group and significantly *increased* mortality in the lowest mortality group.  
5  
6

7  
8 To address these internally inconsistent findings, we developed a logistic regression  
9 model for emergency unit mortality to identify the independent association between supervision  
10 and three-day mortality. Within this model, indirect supervision of non-physician clinician care  
11 and independent non-physician clinician care were both seen to have increased mortality when  
12 compared to direct supervision of non-physician clinician care (Indirect OR=1.49 [95%CI 1.07 -  
13 2.09], Independent OR=1.76 [95%CI 1.09 - 2.86]). This is an expected finding, as no argument  
14 exists in this manuscript or elsewhere suggesting complete equality between physician and non-  
15 physician clinician training, practice or outcomes. Rather, this finding clearly highlights the  
16 importance of the scaling-up of the ongoing emergency medicine physician training efforts in  
17 Uganda to reduce mortality in emergencies nationwide.  
18  
19  
20  
21  
22  
23  
24  
25  
26  
27  
28  
29

30  
31 While emergency medicine physician care for all emergency patients is ideal, the current  
32 rate of emergency medicine specialist training, health system funding, and high demand for  
33 emergency medicine specialist physicians at training institutions and in administrative roles,  
34 means that the ideal of emergency medicine specialist clinical care in emergency units  
35 throughout Uganda may be decades away from being realized. Therefore, optimizing the role of  
36 non-physician clinicians can help address the current gap between emergency care patients and  
37 providers.  
38  
39  
40  
41  
42  
43  
44  
45

46  
47 Because our vital sign analysis suggested that the benefit of direct supervision was  
48 greatest in the highest-risk subset of patients, and this was consistent with prior studies showing  
49 the benefit of direct supervision was limited to severely ill pediatric patients, we performed  
50 additional sensitivity analysis stratifying by vital signs.(42) We found patients with two or fewer  
51  
52  
53  
54  
55  
56  
57  
58  
59

1  
2  
3 abnormal vital signs had no significant reduction in mortality associated with direct supervision.  
4  
5 Importantly, there was also no trend towards harm from direct supervision as suggested by our  
6  
7 initial crude vital sign analysis. Patients with three or more vital sign abnormalities did have a  
8  
9 clinically and statistically significant mortality benefit with direct emergency medicine physician  
10  
11 supervision. We believe this finding could be used at triage to immediately identify patients most  
12  
13 likely to receive benefit from direct emergency medicine physician clinical care or direct  
14  
15 supervision of non-physician clinician care.  
16  
17  
18

19 Indirect physician supervision did not clearly impact mortality in either crude vital sign  
20  
21 or logistic regression analysis. This may stem from an underlying lack of benefit from that model  
22  
23 or from one of several limitations in the real-world implementation of indirect supervision in the  
24  
25 GEC model. GEC relied on volunteer emergency medicine physicians, and only had a volunteer  
26  
27 on site for approximately 85% of the weeks of the “Indirect Supervision” cohort. These  
28  
29 physicians did not have Ugandan medical licenses, were explicitly not permitted to provide  
30  
31 direct care, and volunteers had differing levels of training and local expertise. Further, no  
32  
33 standardized protocol existed to define patients for which non-physician clinicians should  
34  
35 involve the emergency medicine physician in care. Further studies might determine if  
36  
37 protocolized and/or consistent indirect physician supervision could provide a mortality reduction  
38  
39 for high-risk patients similar to direct physician supervision.  
40  
41  
42  
43

44 In total, this manuscript shows that direct supervision of non-physician clinician care by  
45  
46 an emergency medicine physician reduces overall mortality. We strongly support the ongoing  
47  
48 development of emergency medicine specialty training for physicians in Uganda to help achieve  
49  
50 the ultimate goal of providing emergency medicine physician clinical care or direct supervision  
51  
52 for all patients. However, current emergency care staffing shortages in Uganda and elsewhere in  
53  
54  
55  
56  
57  
58  
59  
60

1  
2  
3 Sub-Saharan Africa are likely to persist for decades to come and augmenting the physician  
4 workforce with emergency care specialty-trained non-physician clinicians — who can be trained  
5 more rapidly, at a lower cost, and are more likely to work in rural areas — is a clear path  
6 forward to addressing the immediate emergency care needs faced by millions of Ugandans  
7 today.(4,19,38,51) Our analysis shows that a synergy between these groups is possible: non-  
8 physician clinicians are capable of safely delivering independent care for less severely ill patients  
9 (nearly 90% of patients in our study population) with mortality outcomes similar to care  
10 supervised directly by emergency medicine physician, while direct emergency medicine  
11 physician supervision of non-physician clinician care of the most severely ill patients can reduce  
12 mortality.  
13  
14  
15  
16  
17  
18  
19  
20  
21  
22  
23  
24  
25

### 26 **Limitations**

27  
28 This is a single center, retrospective study of an emergency unit database. Mortality  
29 follow-up was limited to three days. While one week and one month mortality is undoubtedly  
30 important, three-day follow-up was chosen both to minimize loss to follow-up in a setting where  
31 most patients do not have consistent ability to receive phone calls and because follow-up after  
32 three days was thought to be less reflective of outcomes related to acute care provided in the  
33 emergency unit. Inpatient mortality was affected not just by emergency unit care but also by  
34 hospital ward care. However, this care was provided similarly throughout the study, making it  
35 unlikely to bias outcomes in comparisons between cohorts. The decision to code missing blood  
36 pressures in children as normal likely biased the study towards seeing pediatric patients as lower  
37 risk. However, since those patients were predominantly clustered in the direct supervision  
38 cohort, that decision would have biased results towards the null hypothesis (no impact from  
39 direct supervision) and thus was unlikely to bias our findings overall. Lastly, there was a high  
40  
41  
42  
43  
44  
45  
46  
47  
48  
49  
50  
51  
52  
53  
54  
55  
56  
57  
58  
59  
60

1  
2  
3 loss to follow-up in discharged patients over the duration of the study. However, with a mortality  
4 rate of 0.08% (n=7 deaths in 9,175 discharges) in those with complete follow-up, it is highly  
5 unlikely that the 8,308 discharged patients lost to follow-up represent a significant number of  
6 fatal cases excluded from our analysis. The 6.3% loss to follow-up rate for admitted and direct to  
7 theatre patients was otherwise considered adequate given the challenges of emergency unit data  
8 collection in Sub-Saharan Africa.  
9  
10  
11  
12  
13  
14  
15

## 19 CONCLUSIONS

21 This manuscript shows that task-sharing of emergency care specialty-trained non-  
22 physician clinicians to address emergency care staffing shortages is both efficient and safe. As  
23 Uganda strives to reach the goal of consistent emergency medicine physician coverage of  
24 emergency units, operationalizing a hybrid model with emergency medicine physician  
25 supervision of otherwise independent non-physician clinician care for the sickest emergency care  
26 patients has the potential to save lives. Based on the robust evidence base we report above, the  
27 authors' recommendations are as follows:  
28  
29  
30  
31  
32  
33  
34  
35  
36

- 37 1. Scale up emergency medicine physician development and training: The highest risk  
38 approximately 10% of patients had nearly a 50% reduction in mortality with physician  
39 involvement, and direct supervision significantly reduced overall mortality.  
40  
41  
42  
43
- 44 2. Increase capacity for emergency care NCP training: emergency care non-physician  
45 clinicians provided independent care comparable to care given with direct emergency  
46 medicine physician supervision for approximately 90% of patients over the study period.  
47  
48  
49  
50
- 51 3. Create triage protocols for early identification of the highest risk patients: in our analysis  
52 patients with hypoxia or with 3 or more abnormal vital signs are at highest risk for  
53  
54  
55  
56  
57  
58  
59  
60



1  
2  
3 mortality and most likely to derive benefit from emergency medicine physician clinical  
4 care or direct supervision of non-physician clinician care.  
5  
6

- 7  
8 4. Create clear protocols and systems to provide emergency care non-physician clinicians  
9 with direct supervision in person or via phone/telehealth consultation by emergency  
10 medicine physician for critically ill and high-risk patients.  
11  
12  
13  
14  
15  
16  
17  
18  
19  
20  
21  
22  
23  
24  
25  
26  
27  
28  
29  
30  
31  
32  
33  
34  
35  
36  
37  
38  
39  
40  
41  
42  
43  
44  
45  
46  
47  
48  
49  
50  
51  
52  
53  
54  
55  
56  
57  
58  
59  
60

**Contributorship statement:**

BR, AP and MB planned the study. BR, CL analyzed the data. BR, AP, CL, PK, RL, SK, CN, SN, LF, MB interpreted the data in the local context. BR, AP, CL, RL drafted the manuscript. BR, AP, CL, PK, RL, SK, CN, SN, LF, MB revised the manuscript. AP submitted the study. BR and AP are the guarantors of the overall content.

**Competing Interests:** None of the authors have competing interest to disclose.

**Funding:** This study was not funded.

**Data sharing statement:** IRB approval restricts sharing of the full data set.

For peer review only

**REFERENCES:**

1. SIXTIETH WORLD HEALTH ASSEMBLY. WHA60.22: Health systems: emergency-care systems [Internet]. 2007 [cited 2020 Dec 20]. Available from: [https://apps.who.int/iris/bitstream/handle/10665/22596/A60\\_R22-en.pdf?sequence=1&isAllowed=y](https://apps.who.int/iris/bitstream/handle/10665/22596/A60_R22-en.pdf?sequence=1&isAllowed=y)
2. WHA72 R. Resolution WHA72.16. Emergency care systems for universal health coverage: ensuring timely care for the acutely ill and injured. Seventysecond World Health Assembly, Geneva. 2019;28.
3. Organization WH. The world health report 2006: working together for health. World Health Organization; 2006.
4. Asamani JA, Akogun OB, Nyoni J, Ahmat A, Nabyonga-Orem J, Tumusiime P. Towards a regional strategy for resolving the human resources for health challenges in Africa. *BMJ Global Health* [Internet]. 2019 Oct 1 [cited 2021 Aug 30];4(Suppl 9):e001533. Available from: [https://gh.bmj.com/content/4/Suppl\\_9/e001533](https://gh.bmj.com/content/4/Suppl_9/e001533)
5. Calvello et al. Emergency care in sub-Saharan Africa: Results of a consensus conference. 2013;
6. Ningwa A, Muni K, Oporia F, Kalanzi J, Zziwa EB, Biribawa C, et al. The state of emergency medical services and acute health facility care in Uganda: findings from a National Cross-Sectional Survey. *BMC Health Services Research*. 2020;20(1):1–10.
7. Chang CY, Abujaber S, Reynolds TA, Camargo CA, Obermeyer Z. Burden of emergency conditions and emergency care usage: new estimates from 40 countries. *Emerg Med J*. 2016 Nov;33(11):794–800.
8. Obermeyer Z, Abujaber S, Makar M, Stoll S, Kayden SR, Wallis LA, et al. Emergency care in 59 low-and middle-income countries: a systematic review. *Bulletin of the World Health Organization*. 2015;93:577–86.
9. Razzak J, Usmani MF, Bhutta ZA. Global, regional and national burden of emergency medical diseases using specific emergency disease indicators: analysis of the 2015 Global Burden of Disease Study. *BMJ Global Health* [Internet]. 2019 Mar 1 [cited 2020 Feb 25];4(2). Available from: <https://gh.bmj.com/content/4/2/e000733>
10. Uganda | Data [Internet]. [cited 2021 Aug 8]. Available from: <https://data.worldbank.org/country/UG>
11. Medical doctors (per 10 000 population) [Internet]. [cited 2021 Aug 8]. Available from: [https://www.who.int/data/gho/data/indicators/indicator-details/GHO/medical-doctors-\(per-10-000-population\)](https://www.who.int/data/gho/data/indicators/indicator-details/GHO/medical-doctors-(per-10-000-population))
12. THIRD NATIONAL DEVELOPMENT PLAN (NDPIII) 2020/21 – 2024/25 [Internet]. Ugandan National Planning Authority; [cited 2021 Sep 10]. Available from: [http://www.npa.go.ug/wp-content/uploads/2020/08/NDPIII-Finale\\_Compressed.pdf](http://www.npa.go.ug/wp-content/uploads/2020/08/NDPIII-Finale_Compressed.pdf)
13. Kizito P. The total number of Ugandan MMedS enrolled in training. 2021.

14. Eyal N, Cancedda C, Kyamanywa P, Hurst SA. Non-physician Clinicians in Sub-Saharan Africa and the Evolving Role of Physicians. *Int J Health Policy Manag* [Internet]. 2015 Dec 30 [cited 2021 Aug 14];5(3):149–53. Available from: <https://www.ncbi.nlm.nih.gov/pmc/articles/PMC4770920/>
15. Fulton BD, Scheffler RM, Sparkes SP, Auh EY, Vujicic M, Soucat A. Health workforce skill mix and task shifting in low income countries: a review of recent evidence. *Human resources for health* [Internet]. 2011 Jan;9(1):1. Available from: [http://www.human-resources-health.com/content/9/1/1\\_papers3://publication/doi/10.1186/1478-4491-9-1](http://www.human-resources-health.com/content/9/1/1_papers3://publication/doi/10.1186/1478-4491-9-1)
16. Lehmann U, Van Damme W, Barten F, Sanders D. Task shifting: the answer to the human resources crisis in Africa? *Human Resources for Health* [Internet]. 2009 Jun 21 [cited 2021 Apr 5];7(1):49. Available from: <https://doi.org/10.1186/1478-4491-7-49>
17. Mullan F, Frehywot S. Non-physician clinicians in 47 sub-Saharan African countries. *The Lancet* [Internet]. 2007 Dec 22 [cited 2021 Apr 5];370(9605):2158–63. Available from: <https://www.sciencedirect.com/science/article/pii/S0140673607607855>
18. Organization WH. Task shifting: rational redistribution of tasks among health workforce teams: global recommendations and guidelines. 2007;
19. Organization WH. Mid-level health workers: a review of the evidence. 2018;
20. Terry et al. Task shifting: Meeting the human resources needs for acute and emergency care in Africa. 2012;
21. Bergström S. Training non-physician mid-level providers of care (associate clinicians) to perform caesarean sections in low-income countries. *Best Practice & Research Clinical Obstetrics & Gynaecology* [Internet]. 2015 Nov 1 [cited 2021 Apr 2];29(8):1092–101. Available from: <https://www.sciencedirect.com/science/article/pii/S1521693415000632>
22. Gajewski J, Cheelo M, Bijlmakers L, Kachimba J, Pittalis C, Brugha R. The contribution of non-physician clinicians to the provision of surgery in rural Zambia—a randomised controlled trial. *Human Resources for Health* [Internet]. 2019 Jul 22 [cited 2021 Apr 2];17(1):60. Available from: <https://doi.org/10.1186/s12960-019-0398-9>
23. Wilhelm TJ, Thawe IK, Mwatibu B, Mothes H, Post S. Efficacy of major general surgery performed by non-physician clinicians at a central hospital in Malawi. *Trop Doct* [Internet]. 2011 Apr 1 [cited 2021 Apr 2];41(2):71–5. Available from: <https://doi.org/10.1258/td.2010.100272>
24. Wilhelm TJ, Dzimbiri K, Sembereka V, Gumeni M, Bach O, Mothes H. Task-shifting of orthopaedic surgery to non-physician clinicians in Malawi: effective and safe? *Tropical doctor*. 2017;47(4):294–9.
25. Gessesew A, Barnabas GA, Prata N, Weidert K. Task shifting and sharing in Tigray, Ethiopia, to achieve comprehensive emergency obstetric care. *International Journal of Gynecology & Obstetrics* [Internet]. 2011 Apr 1 [cited 2021 Apr 2];113(1):28–31. Available from: <https://www.sciencedirect.com/science/article/pii/S0020729211000038>

- 1  
2  
3 26. Nyamtema AS, Pemba SK, Mbaruku G, Rutasha FD, van Roosmalen J. Tanzanian  
4 lessons in using non-physician clinicians to scale up comprehensive emergency obstetric  
5 care in remote and rural areas. *Human Resources for Health* [Internet]. 2011 Nov 9 [cited  
6 2021 Apr 2];9(1):28. Available from: <https://doi.org/10.1186/1478-4491-9-28>  
7
- 8 27. Beard JH, Oresanya LB, Akoko L, Mwanga A, Mkony CA, Dicker RA. Surgical Task-  
9 Shifting in a Low-Resource Setting: Outcomes After Major Surgery Performed by  
10 Nonphysician Clinicians in Tanzania. *World J Surg* [Internet]. 2014 Jun 1 [cited 2021 Apr  
11 2];38(6):1398–404. Available from: <https://doi.org/10.1007/s00268-013-2446-2>  
12
- 13 28. Chamberlain S, Stolz U, Dreifuss B, Nelson SW, Hammerstedt H, Andinda J, et al.  
14 Mortality related to acute illness and injury in rural Uganda: task shifting to improve  
15 outcomes. *PloS one*. 2015;10(4):e0122559.  
16
- 17 29. Hammerstedt H MD, MPH, Maling S MBChB, Kasyaba R MBChB, Dreifuss B MD,  
18 Chamberlain S MD, MPH, Nelson S MD, et al. Addressing World Health Assembly  
19 Resolution 60.22: A Pilot Project to Create Access to Acute Care Services in Uganda.  
20 *Annals of Emergency Medicine* [Internet]. 2014;64(5):461–8. Available from:  
21 <https://www.clinicalkey.es/playcontent/1-s2.0-S0196064414000973>  
22
- 23 30. Guidelines Regarding the Role of Physician Assistants and Nurse Practitioners in the  
24 Emergency Department [Internet]. [cited 2021 Aug 8]. Available from:  
25 <https://www.acep.org/patient-care/policy-statements/guidelines-regarding-the-role-of-physician-assistants-and-nurse-practitioners-in-the-emergency-department/>  
26
- 27 31. Hooker RS, Klocko DJ, Larkin GL. Physician Assistants in Emergency Medicine: The  
28 Impact of Their Role. *Academic Emergency Medicine* [Internet]. 2011 [cited 2021 Aug  
29 8];18(1):72–7. Available from: <https://onlinelibrary.wiley.com/doi/abs/10.1111/j.1553-2712.2010.00953.x>  
30
- 31 32. Doan Q, Sabhaney V, Kissoon N, Sheps S, Singer J. A systematic review: The role and  
32 impact of the physician assistant in the emergency department. *Emergency Medicine  
33 Australasia* [Internet]. 2011 [cited 2021 Aug 8];23(1):7–15. Available from:  
34 <https://onlinelibrary.wiley.com/doi/abs/10.1111/j.1742-6723.2010.01368.x>  
35
- 36 33. Yordanov Y, Chouihed T, Riou B, Boursin P. Task shifting and emergency nurse  
37 practitioners – are nurses the future of emergency medicine?: the French experience.  
38 *European Journal of Emergency Medicine* [Internet]. 2020 Feb [cited 2021 Aug 8];27(1):9–  
39 10. Available from: [https://journals.lww.com/euro-emergencymed/Citation/2020/02000/Task\\_shifting\\_and\\_emergency\\_nurse\\_practitioners\\_\\_5.aspx](https://journals.lww.com/euro-emergencymed/Citation/2020/02000/Task_shifting_and_emergency_nurse_practitioners__5.aspx)  
40
- 41 34. Couper I, Ray S, Blaauw D, Ng'wena G, Muchiri L, Oyungu E, et al. Curriculum and  
42 training needs of mid-level health workers in Africa: a situational review from Kenya,  
43 Nigeria, South Africa and Uganda. *BMC Health Services Research* [Internet]. 2018 Jul 16  
44 [cited 2021 Apr 2];18(1):553. Available from: <https://doi.org/10.1186/s12913-018-3362-9>  
45
- 46 35. Freistadt F, Branigan E, Pupp C, Stefanutto M, Bambo C, Alexandre M, et al. A framework  
47 for revising preservice curriculum for nonphysician clinicians: The mozambique  
48 experience. *Education for Health* [Internet]. 2014 Sep 1 [cited 2021 Apr 2];27(3):283.  
49  
50  
51  
52  
53  
54  
55  
56  
57  
58  
59

- Available from: <https://www.educationforhealth.net/article.asp?issn=1357-6283;year=2014;volume=27;issue=3;spage=283;epage=288;aulast=Freistadt;type=0>
36. Rick TJ, Moshi DD. The Tanzanian assistant medical officer. *Journal of the American Academy of PAs*. 2018;31(4):43–7.
  37. Yasmin F, Schultz A, Phiri A, Weigel R. “I Need to Be the First One With a Different Approach and to Make a Difference to the People”-Transforming Pediatric Training for Non-physician Clinicians in Malawi: A Mixed-method Study. 2020;
  38. Zhao Y, Hagel C, Tweheyo R, Sirili N, Gathara D, English M. Task-sharing to support paediatric and child health service delivery in low- and middle-income countries: current practice and a scoping review of emerging opportunities. *Human Resources for Health [Internet]*. 2021 Aug 4 [cited 2021 Aug 5];19(1):95. Available from: <https://doi.org/10.1186/s12960-021-00637-5>
  39. Bitter CC, Rice B, Periyanyagam U, Dreifuss B, Hammerstedt H, Nelson SW, et al. What resources are used in emergency departments in rural sub-Saharan Africa? A retrospective analysis of patient care in a district-level hospital in Uganda. *BMJ Open [Internet]*. 2018 Feb;8(2):e019024. Available from: <http://eutils.ncbi.nlm.nih.gov/entrez/eutils/elink.fcgi?dbfrom=pubmed&id=29478017&retmode=ref&cmd=prlinks> papers3://publication/doi/10.1136/bmjopen-2017-019024
  40. Colella M, Bisanzo M, Farquhar C, Nambaziira R, Carter E, Gimbel S, et al. Implementation and evaluation of an innovative leadership and teacher training program for non-physician emergency medicine practitioners in Uganda. *African Journal of Emergency Medicine [Internet]*. 2019 Mar 1 [cited 2021 Aug 8];9(1):25–9. Available from: <https://www.sciencedirect.com/science/article/pii/S2211419X18300077>
  41. Dresser C, Periyanyagam U, Dreifuss B, Wangoda R, Luyimbaazi J, Bisanzo M. Management and Outcomes of Acute Surgical Patients at a District Hospital in Uganda with Non-physician Emergency Clinicians. *World Journal of Surgery [Internet]*. 2017 Jan;41(9):2193–9. Available from: <https://link.springer-com.ezproxy.med.nyu.edu/article/10.1007/s00268-017-4014-7> papers3://publication/doi/10.1007/s00268-017-4014-7
  42. Rice B, Periyanyagam U, Chamberlain S, Dreifuss B, Hammerstedt H, Nelson S, et al. Mortality in Children Under Five Receiving Nonphysician Clinician Emergency Care in Uganda. *Pediatrics [Internet]*. 2016 Mar;137(3):e20153201–e20153201. Available from: <http://pediatrics.aappublications.org/cgi/doi/10.1542/peds.2015-3201>
  43. Rice B, Leanza J, Mowafi H, Thadeus Kamara N, Mugema Mulogo E, Bisanzo M, et al. Defining high-risk emergency chief complaints: data-driven triage for low-and middle-income countries. *Academic Emergency Medicine*. 2020;27(12):1291–301.
  44. Rybarczyk MM, Ludmer N, Broccoli MC, Kivlehan SM, Niescierenko M, Bisanzo M, et al. Emergency Medicine Training Programs in Low- and Middle-Income Countries: A Systematic Review. *Ann Glob Health [Internet]*. [cited 2021 Mar 2];86(1). Available from: <https://www.ncbi.nlm.nih.gov/pmc/articles/PMC7304456/>

- 1  
2  
3 45. Byrne-Davis LMT, Jackson MJ, McCarthy R, Slattery H, Yuill G, Stevens A, et al. A pre-  
4 post study of behavioural determinants and practice change in Ugandan clinical officers.  
5 African Journal of Health Professions Education. 2018;10(4):220–7.  
6  
7 46. Fant CD, Schwartz KR, Patel H, Fredricks K, Nelson BD, Ouma K, et al. Developing and  
8 Implementing a Pediatric Emergency Care Curriculum for Providers at District Level  
9 Hospitals in Sub-Saharan Africa: A Case Study in Kenya. Front Public Health [Internet].  
10 2017 Dec 11 [cited 2020 Dec 30];5:322. Available from:  
11 <http://journal.frontiersin.org/article/10.3389/fpubh.2017.00322/full>  
12  
13 47. James DR, Barling J, Ross O, Daniel AA, Crocker C, Jarvis E, et al. G293 (P) Towards  
14 emergency triage assessment and treatment (ETAT)++: introducing basic paediatric  
15 trauma management skills in rural Ghana. Archives of Disease in Childhood.  
16 2019;104(Suppl 2):A120.  
17  
18 48. Niyogi A, Villona B, Rubenstein BL, Hubbard SJ, Baiden F, Moresky RT. In-service training  
19 of physician assistants in acute care in Ghana: Challenges, successes, and lessons  
20 learned. African Journal of Emergency Medicine. 2015 Sep 1;5(3):114–9.  
21  
22 49. Uganda - World Bank Open Data [Internet]. The World Bank; [cited 2021 Sep 4]. Available  
23 from: <https://data.worldbank.org/country/UG>  
24  
25 50. Vittinghoff E, McCulloch CE. Relaxing the Rule of Ten Events per Variable in Logistic and  
26 Cox Regression. American Journal of Epidemiology [Internet]. 2007 Mar 15 [cited 2021  
27 Dec 2];165(6):710–8. Available from: <https://doi.org/10.1093/aje/kwk052>  
28  
29 51. Seidman G, Atun R. Does task shifting yield cost savings and improve efficiency for health  
30 systems? A systematic review of evidence from low-income and middle-income countries.  
31 Human Resources for Health [Internet]. 2017 Apr 13 [cited 2021 Apr 5];15(1):29. Available  
32 from: <https://doi.org/10.1186/s12960-017-0200-9>  
33  
34  
35  
36  
37  
38  
39  
40  
41  
42  
43  
44  
45  
46  
47  
48  
49  
50  
51  
52  
53  
54  
55  
56  
57  
58  
59  
60



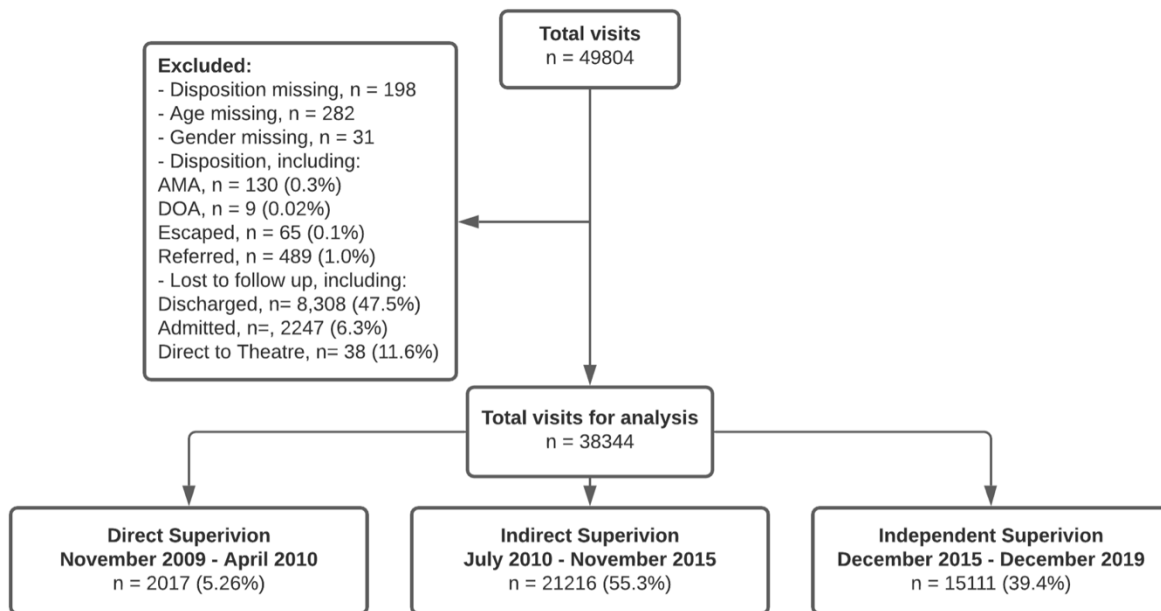

er review only



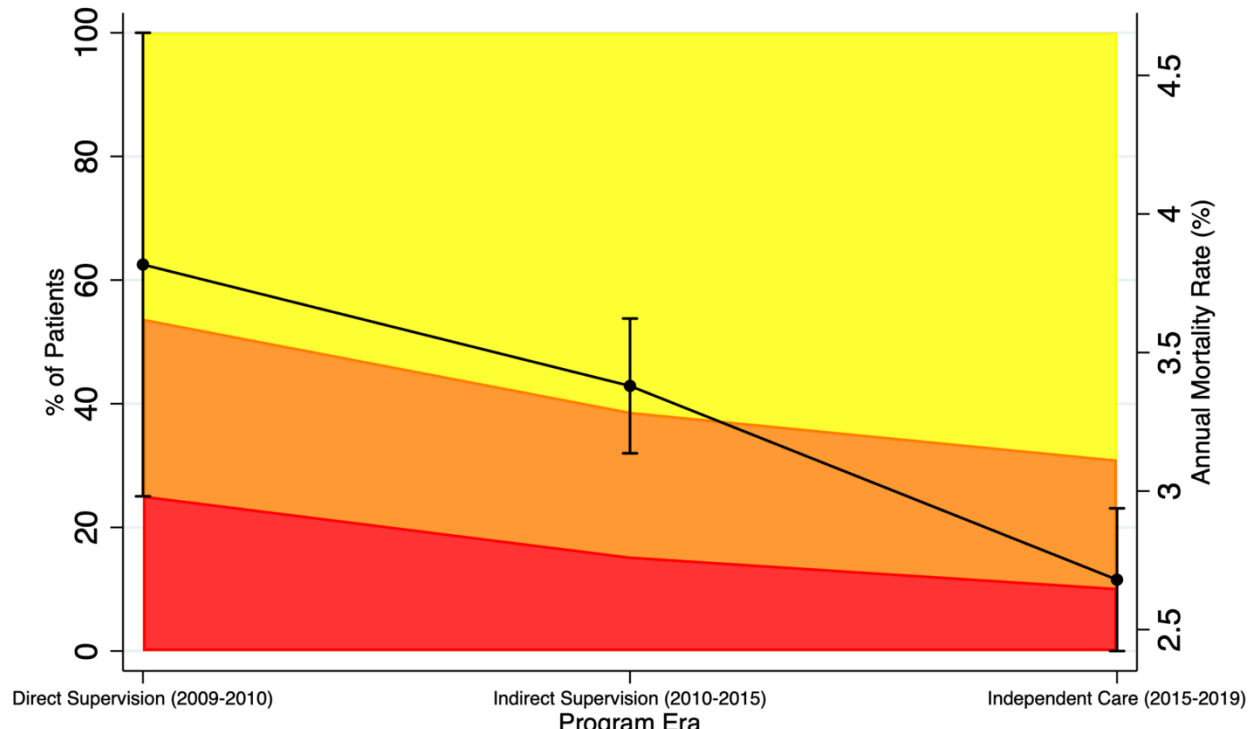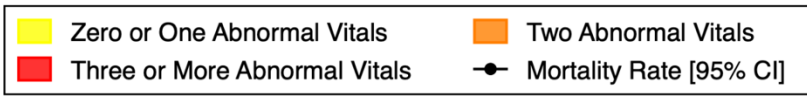

view only

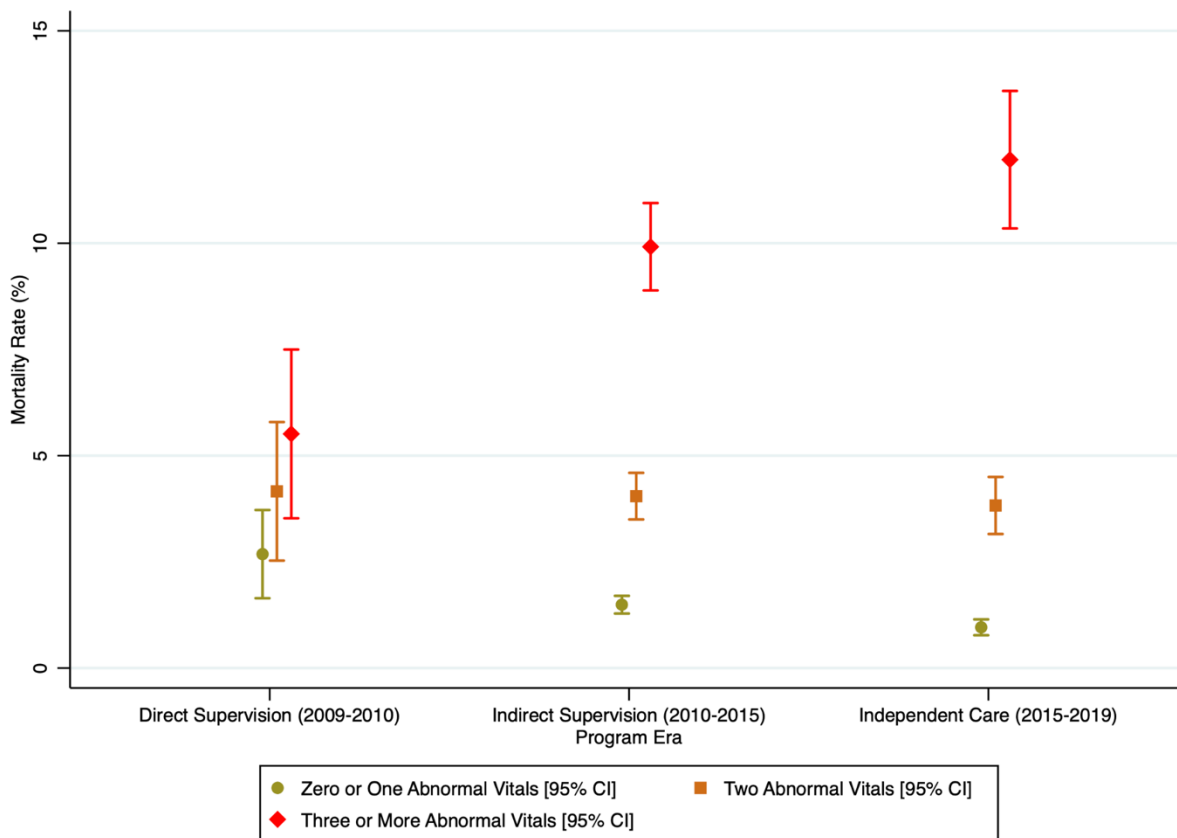

view only

| Appendix 1: Mortality by Supervision and Abnormal Vital Signs      |                       |                         |                        |         |
|--------------------------------------------------------------------|-----------------------|-------------------------|------------------------|---------|
|                                                                    | Direct Era            | Indirect Era            | Independent Era        | P-value |
| <b>Mortality by number of abnormal vital signs, % [95% CI] (n)</b> |                       |                         |                        |         |
| 0 or 1                                                             | 2.7% [1.6 - 3.7] (25) | 1.5% [1.3 - 1.7] (194)  | 1.0% [0.8 - 1.1] (100) | <0.001  |
| 2                                                                  | 4.2% [2.5 - 5.8] (24) | 4.1% [3.5 - 4.6] (201)  | 3.8% [3.2 - 4.5] (120) | 0.86    |
| 3 or more                                                          | 5.5% [3.5 - 7.5] (28) | 9.9% [8.9 - 10.9] (322) | 12% [10.3 -13.4] (185) | <0.001  |

All p-values calculated with chi-squared

**The RECORD statement – checklist of items, extended from the STROBE statement, that should be reported in observational studies using routinely collected health data.**

|                           | Item No. | STROBE items                                                                                                                                                                               | Location in manuscript where items are reported | RECORD items                                                                                                                                                                                                                                                                                                                                                                                                                                | Location in manuscript where items are reported |
|---------------------------|----------|--------------------------------------------------------------------------------------------------------------------------------------------------------------------------------------------|-------------------------------------------------|---------------------------------------------------------------------------------------------------------------------------------------------------------------------------------------------------------------------------------------------------------------------------------------------------------------------------------------------------------------------------------------------------------------------------------------------|-------------------------------------------------|
| <b>Title and abstract</b> |          |                                                                                                                                                                                            |                                                 |                                                                                                                                                                                                                                                                                                                                                                                                                                             |                                                 |
|                           | 1        | (a) Indicate the study's design with a commonly used term in the title or the abstract (b) Provide in the abstract an informative and balanced summary of what was done and what was found |                                                 | RECORD 1.1: The type of data used should be specified in the title or abstract. When possible, the name of the databases used should be included.<br><br>RECORD 1.2: If applicable, the geographic region and timeframe within which the study took place should be reported in the title or abstract.<br><br>RECORD 1.3: If linkage between databases was conducted for the study, this should be clearly stated in the title or abstract. | 1                                               |
| <b>Introduction</b>       |          |                                                                                                                                                                                            |                                                 |                                                                                                                                                                                                                                                                                                                                                                                                                                             |                                                 |
| Background rationale      | 2        | Explain the scientific background and rationale for the investigation being reported                                                                                                       |                                                 |                                                                                                                                                                                                                                                                                                                                                                                                                                             | 3                                               |
| Objectives                | 3        | State specific objectives, including any prespecified hypotheses                                                                                                                           |                                                 |                                                                                                                                                                                                                                                                                                                                                                                                                                             | 5                                               |
| <b>Methods</b>            |          |                                                                                                                                                                                            |                                                 |                                                                                                                                                                                                                                                                                                                                                                                                                                             |                                                 |
| Study Design              | 4        | Present key elements of study design early in the paper                                                                                                                                    |                                                 |                                                                                                                                                                                                                                                                                                                                                                                                                                             | 8                                               |
| Setting                   | 5        | Describe the setting, locations, and relevant dates, including periods of recruitment, exposure, follow-up, and data collection                                                            |                                                 |                                                                                                                                                                                                                                                                                                                                                                                                                                             | 6                                               |

|                                                                                                                                                                                                            |          |                                                                                                                                                                                                                                                                                                                                                                                                                                                                                                                                                                                                                                                                                                                        |  |                                                                                                                                                                                                                                                                                                                                                                                                                                                                                                                                                                                                                                                                                                      |          |
|------------------------------------------------------------------------------------------------------------------------------------------------------------------------------------------------------------|----------|------------------------------------------------------------------------------------------------------------------------------------------------------------------------------------------------------------------------------------------------------------------------------------------------------------------------------------------------------------------------------------------------------------------------------------------------------------------------------------------------------------------------------------------------------------------------------------------------------------------------------------------------------------------------------------------------------------------------|--|------------------------------------------------------------------------------------------------------------------------------------------------------------------------------------------------------------------------------------------------------------------------------------------------------------------------------------------------------------------------------------------------------------------------------------------------------------------------------------------------------------------------------------------------------------------------------------------------------------------------------------------------------------------------------------------------------|----------|
| <p>1<br/>2<br/>3<br/>4<br/>5<br/>6<br/>7<br/>8<br/>9<br/>10<br/>11<br/>12<br/>13<br/>14<br/>15<br/>16<br/>17<br/>18<br/>19<br/>20<br/>21<br/>22<br/>23<br/>24<br/>25<br/>26<br/>27</p> <p>Participants</p> | <p>6</p> | <p>(a) <i>Cohort study</i> - Give the eligibility criteria, and the sources and methods of selection of participants. Describe methods of follow-up<br/> <i>Case-control study</i> - Give the eligibility criteria, and the sources and methods of case ascertainment and control selection. Give the rationale for the choice of cases and controls<br/> <i>Cross-sectional study</i> - Give the eligibility criteria, and the sources and methods of selection of participants</p> <p>(b) <i>Cohort study</i> - For matched studies, give matching criteria and number of exposed and unexposed<br/> <i>Case-control study</i> - For matched studies, give matching criteria and the number of controls per case</p> |  | <p>RECORD 6.1: The methods of study population selection (such as codes or algorithms used to identify subjects) should be listed in detail. If this is not possible, an explanation should be provided.</p> <p>RECORD 6.2: Any validation studies of the codes or algorithms used to select the population should be referenced. If validation was conducted for this study and not published elsewhere, detailed methods and results should be provided.</p> <p>RECORD 6.3: If the study involved linkage of databases, consider use of a flow diagram or other graphical display to demonstrate the data linkage process, including the number of individuals with linked data at each stage.</p> | <p>7</p> |
| <p>28<br/>29<br/>30<br/>31<br/>32<br/>33<br/>34</p> <p>Variables</p>                                                                                                                                       | <p>7</p> | <p>Clearly define all outcomes, exposures, predictors, potential confounders, and effect modifiers. Give diagnostic criteria, if applicable.</p>                                                                                                                                                                                                                                                                                                                                                                                                                                                                                                                                                                       |  | <p>RECORD 7.1: A complete list of codes and algorithms used to classify exposures, outcomes, confounders, and effect modifiers should be provided. If these cannot be reported, an explanation should be provided.</p>                                                                                                                                                                                                                                                                                                                                                                                                                                                                               | <p>7</p> |
| <p>35<br/>36<br/>37<br/>38<br/>39<br/>40<br/>41<br/>42</p> <p>Data sources/<br/>measurement</p>                                                                                                            | <p>8</p> | <p>For each variable of interest, give sources of data and details of methods of assessment (measurement). Describe comparability of assessment methods if there is more than one group</p>                                                                                                                                                                                                                                                                                                                                                                                                                                                                                                                            |  |                                                                                                                                                                                                                                                                                                                                                                                                                                                                                                                                                                                                                                                                                                      | <p>7</p> |

|                                                                                                                                                    |                                  |    |                                                                                                                                                                                                                                                                                                                                                                                                                                                                                                                                                                      |                                                                                                                                                       |   |
|----------------------------------------------------------------------------------------------------------------------------------------------------|----------------------------------|----|----------------------------------------------------------------------------------------------------------------------------------------------------------------------------------------------------------------------------------------------------------------------------------------------------------------------------------------------------------------------------------------------------------------------------------------------------------------------------------------------------------------------------------------------------------------------|-------------------------------------------------------------------------------------------------------------------------------------------------------|---|
| 1<br>2<br>3<br>4                                                                                                                                   | Bias                             | 9  | Describe any efforts to address potential sources of bias                                                                                                                                                                                                                                                                                                                                                                                                                                                                                                            |                                                                                                                                                       | 7 |
| 5<br>6<br>7<br>8<br>9                                                                                                                              | Study size                       | 10 | Explain how the study size was arrived at                                                                                                                                                                                                                                                                                                                                                                                                                                                                                                                            |                                                                                                                                                       | 7 |
| 10<br>11<br>12<br>13<br>14<br>15<br>16<br>17<br>18<br>19<br>20<br>21<br>22<br>23<br>24<br>25<br>26<br>27<br>28<br>29<br>30<br>31<br>32<br>33<br>34 | Quantitative variables           | 11 | Explain how quantitative variables were handled in the analyses. If applicable, describe which groupings were chosen, and why                                                                                                                                                                                                                                                                                                                                                                                                                                        |                                                                                                                                                       | 8 |
| 35<br>36<br>37<br>38<br>39<br>40<br>41<br>42<br>43<br>44<br>45<br>46<br>47                                                                         | Statistical methods              | 12 | (a) Describe all statistical methods, including those used to control for confounding<br>(b) Describe any methods used to examine subgroups and interactions<br>(c) Explain how missing data were addressed<br>(d) <i>Cohort study</i> - If applicable, explain how loss to follow-up was addressed<br><i>Case-control study</i> - If applicable, explain how matching of cases and controls was addressed<br><i>Cross-sectional study</i> - If applicable, describe analytical methods taking account of sampling strategy<br>(e) Describe any sensitivity analyses |                                                                                                                                                       | 8 |
|                                                                                                                                                    | Data access and cleaning methods |    | ..                                                                                                                                                                                                                                                                                                                                                                                                                                                                                                                                                                   | RECORD 12.1: Authors should describe the extent to which the investigators had access to the database population used to create the study population. | 9 |

|                  |    |                                                                                                                                                                                                                                                                                                                                                 |  |                                                                                                                                                                                                                                                                                                                    |     |
|------------------|----|-------------------------------------------------------------------------------------------------------------------------------------------------------------------------------------------------------------------------------------------------------------------------------------------------------------------------------------------------|--|--------------------------------------------------------------------------------------------------------------------------------------------------------------------------------------------------------------------------------------------------------------------------------------------------------------------|-----|
|                  |    |                                                                                                                                                                                                                                                                                                                                                 |  | RECORD 12.2: Authors should provide information on the data cleaning methods used in the study.                                                                                                                                                                                                                    |     |
| Linkage          |    | ..                                                                                                                                                                                                                                                                                                                                              |  | RECORD 12.3: State whether the study included person-level, institutional-level, or other data linkage across two or more databases. The methods of linkage and methods of linkage quality evaluation should be provided.                                                                                          | n/a |
| <b>Results</b>   |    |                                                                                                                                                                                                                                                                                                                                                 |  |                                                                                                                                                                                                                                                                                                                    |     |
| Participants     | 13 | (a) Report the numbers of individuals at each stage of the study ( <i>e.g.</i> , numbers potentially eligible, examined for eligibility, confirmed eligible, included in the study, completing follow-up, and analysed)<br>(b) Give reasons for non-participation at each stage.<br>(c) Consider use of a flow diagram                          |  | RECORD 13.1: Describe in detail the selection of the persons included in the study ( <i>i.e.</i> , study population selection) including filtering based on data quality, data availability and linkage. The selection of included persons can be described in the text and/or by means of the study flow diagram. | 9   |
| Descriptive data | 14 | (a) Give characteristics of study participants ( <i>e.g.</i> , demographic, clinical, social) and information on exposures and potential confounders<br>(b) Indicate the number of participants with missing data for each variable of interest<br>(c) <i>Cohort study</i> - summarise follow-up time ( <i>e.g.</i> , average and total amount) |  |                                                                                                                                                                                                                                                                                                                    | 10  |
| Outcome data     | 15 | <i>Cohort study</i> - Report numbers of outcome events or summary measures over time<br><i>Case-control study</i> - Report numbers in each exposure                                                                                                                                                                                             |  |                                                                                                                                                                                                                                                                                                                    | 11  |

|                   |    |                                                                                                                                                                                                                                                                                                                                                                                                                 |  |                                                                                                                                                                                                                                                                                                          |    |
|-------------------|----|-----------------------------------------------------------------------------------------------------------------------------------------------------------------------------------------------------------------------------------------------------------------------------------------------------------------------------------------------------------------------------------------------------------------|--|----------------------------------------------------------------------------------------------------------------------------------------------------------------------------------------------------------------------------------------------------------------------------------------------------------|----|
|                   |    | category, or summary measures of exposure<br><i>Cross-sectional study</i> - Report numbers of outcome events or summary measures                                                                                                                                                                                                                                                                                |  |                                                                                                                                                                                                                                                                                                          |    |
| Main results      | 16 | (a) Give unadjusted estimates and, if applicable, confounder-adjusted estimates and their precision (e.g., 95% confidence interval). Make clear which confounders were adjusted for and why they were included<br>(b) Report category boundaries when continuous variables were categorized<br>(c) If relevant, consider translating estimates of relative risk into absolute risk for a meaningful time period |  |                                                                                                                                                                                                                                                                                                          | 11 |
| Other analyses    | 17 | Report other analyses done— e.g., analyses of subgroups and interactions, and sensitivity analyses                                                                                                                                                                                                                                                                                                              |  |                                                                                                                                                                                                                                                                                                          | 15 |
| <b>Discussion</b> |    |                                                                                                                                                                                                                                                                                                                                                                                                                 |  |                                                                                                                                                                                                                                                                                                          |    |
| Key results       | 18 | Summarise key results with reference to study objectives                                                                                                                                                                                                                                                                                                                                                        |  |                                                                                                                                                                                                                                                                                                          | 15 |
| Limitations       | 19 | Discuss limitations of the study, taking into account sources of potential bias or imprecision. Discuss both direction and magnitude of any potential bias                                                                                                                                                                                                                                                      |  | RECORD 19.1: Discuss the implications of using data that were not created or collected to answer the specific research question(s). Include discussion of misclassification bias, unmeasured confounding, missing data, and changing eligibility over time, as they pertain to the study being reported. | 19 |
| Interpretation    | 20 | Give a cautious overall interpretation of results considering objectives,                                                                                                                                                                                                                                                                                                                                       |  |                                                                                                                                                                                                                                                                                                          | 20 |



|                                                           |    |                                                                                                                                                               |  |                                                                                                                                                          |     |
|-----------------------------------------------------------|----|---------------------------------------------------------------------------------------------------------------------------------------------------------------|--|----------------------------------------------------------------------------------------------------------------------------------------------------------|-----|
|                                                           |    | limitations, multiplicity of analyses, results from similar studies, and other relevant evidence                                                              |  |                                                                                                                                                          |     |
| Generalisability                                          | 21 | Discuss the generalisability (external validity) of the study results                                                                                         |  |                                                                                                                                                          | 19  |
| <b>Other Information</b>                                  |    |                                                                                                                                                               |  |                                                                                                                                                          |     |
| Funding                                                   | 22 | Give the source of funding and the role of the funders for the present study and, if applicable, for the original study on which the present article is based |  |                                                                                                                                                          | n/a |
| Accessibility of protocol, raw data, and programming code |    | ..                                                                                                                                                            |  | RECORD 22.1: Authors should provide information on how to access any supplemental information such as the study protocol, raw data, or programming code. | n/a |

\*Reference: Benchimol EI, Smeeth L, Guttman A, Harron K, Moher D, Petersen I, Sørensen HT, von Elm E, Langan SM, the RECORD Working Committee. The REporting of studies Conducted using Observational Routinely-collected health Data (RECORD) Statement. *PLoS Medicine* 2015; in press.

\*Checklist is protected under Creative Commons Attribution ([CC BY](https://creativecommons.org/licenses/by/4.0/)) license.

# BMJ Open

## Mortality Outcomes in Task-Sharing for Emergency Care: Impact of Emergency Physician Supervision on Non-Physician Emergency Care in Rural Uganda

|                                 |                                                                                                                                                                                                                                                                                                                                                                                                                                                                                                                                                                                                                                                                                                                                                                                               |
|---------------------------------|-----------------------------------------------------------------------------------------------------------------------------------------------------------------------------------------------------------------------------------------------------------------------------------------------------------------------------------------------------------------------------------------------------------------------------------------------------------------------------------------------------------------------------------------------------------------------------------------------------------------------------------------------------------------------------------------------------------------------------------------------------------------------------------------------|
| Journal:                        | <i>BMJ Open</i>                                                                                                                                                                                                                                                                                                                                                                                                                                                                                                                                                                                                                                                                                                                                                                               |
| Manuscript ID                   | bmjopen-2021-059859.R1                                                                                                                                                                                                                                                                                                                                                                                                                                                                                                                                                                                                                                                                                                                                                                        |
| Article Type:                   | Original research                                                                                                                                                                                                                                                                                                                                                                                                                                                                                                                                                                                                                                                                                                                                                                             |
| Date Submitted by the Author:   | 02-May-2022                                                                                                                                                                                                                                                                                                                                                                                                                                                                                                                                                                                                                                                                                                                                                                                   |
| Complete List of Authors:       | Rice, Brian; Stanford University, Emergency Medicine<br>Pickering, Ashley; University of Maryland Medical Center, Emergency Medicine<br>Laurence, Colleen; University of Cincinnati College of Medicine<br>Department of Emergency Medicine<br>Kizito, Prisca; Mbarara University of Science and Technology; Mbarara Regional Referral Hospital<br>Leff, Rebecca ; Mayo Clinic College of Medicine and Science<br>Kisingiri, Steven; Global Emergency Care; Liverpool John Moores University<br>Ndyamwijuka, Charles; Global Emergency Care<br>Nakato, Serena; Global Emergency Care; Karoli Lwanga Hospital<br>Adriko, Lema; Karoli Lwanga Hospital<br>Bisanzo, Mark; University of Vermont College of Medicine<br>Investigators, Global Emergency Care Collaborative; Global Emergency Care |
| <b>Primary Subject Heading</b>: | Global health                                                                                                                                                                                                                                                                                                                                                                                                                                                                                                                                                                                                                                                                                                                                                                                 |
| Secondary Subject Heading:      | Emergency medicine, Health policy, Public health                                                                                                                                                                                                                                                                                                                                                                                                                                                                                                                                                                                                                                                                                                                                              |
| Keywords:                       | Health policy < HEALTH SERVICES ADMINISTRATION & MANAGEMENT, Public health < INFECTIOUS DISEASES, ACCIDENT & EMERGENCY MEDICINE, MEDICAL EDUCATION & TRAINING, TRAUMA MANAGEMENT, HEALTH SERVICES ADMINISTRATION & MANAGEMENT                                                                                                                                                                                                                                                                                                                                                                                                                                                                                                                                                                 |
|                                 |                                                                                                                                                                                                                                                                                                                                                                                                                                                                                                                                                                                                                                                                                                                                                                                               |

SCHOLARONE™  
Manuscripts

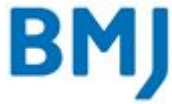

I, the Submitting Author has the right to grant and does grant on behalf of all authors of the Work (as defined in the below author licence), an exclusive licence and/or a non-exclusive licence for contributions from authors who are: i) UK Crown employees; ii) where BMJ has agreed a CC-BY licence shall apply, and/or iii) in accordance with the terms applicable for US Federal Government officers or employees acting as part of their official duties; on a worldwide, perpetual, irrevocable, royalty-free basis to BMJ Publishing Group Ltd ("BMJ") its licensees and where the relevant Journal is co-owned by BMJ to the co-owners of the Journal, to publish the Work in this journal and any other BMJ products and to exploit all rights, as set out in our [licence](#).

The Submitting Author accepts and understands that any supply made under these terms is made by BMJ to the Submitting Author unless you are acting as an employee on behalf of your employer or a postgraduate student of an affiliated institution which is paying any applicable article publishing charge ("APC") for Open Access articles. Where the Submitting Author wishes to make the Work available on an Open Access basis (and intends to pay the relevant APC), the terms of reuse of such Open Access shall be governed by a Creative Commons licence – details of these licences and which [Creative Commons](#) licence will apply to this Work are set out in our licence referred to above.

Other than as permitted in any relevant BMJ Author's Self Archiving Policies, I confirm this Work has not been accepted for publication elsewhere, is not being considered for publication elsewhere and does not duplicate material already published. I confirm all authors consent to publication of this Work and authorise the granting of this licence.

# Mortality Outcomes in Task-Sharing for Emergency Care: Impact of Emergency Physician Supervision on Non-Physician Emergency Care in Rural Uganda

Co-Frist: Brian Rice MDCM, MSc, DTM&H<sup>1,2</sup> and Ashley Pickering MD, MPH<sup>2,3</sup>, Colleen Laurence MD, MPH<sup>4</sup>, Prisca Mary Kizito MBChB, EA-DTM&H, MMED EM<sup>5,6,7,8</sup>, Rebecca Leff MD<sup>9</sup>, Steven Jonathan Kisingiri MBA<sup>2,10</sup>, Charles Ndyamwijuka MSM&E<sup>2</sup>, Serena Nakato<sup>2,11</sup>, Lema Felix Adriko MBChB, MMED OBS/GYN<sup>11</sup>, Mark Bisanzo MD, DTM&H<sup>2,12</sup>, on behalf of the Global Emergency Care Collaborative Investigators

Global Emergency Care Collaborative Investigators: **Mark Bisanzo, Heather Hammerstedt, Stacey Chamberlain and Bradley Dreifuss**

1. Stanford University
2. Global Emergency Care
3. University of Maryland School of Medicine
4. University of Cincinnati College of Medicine
5. Mbarara University of Science and Technology
6. Mbarara Regional Referral Hospital
7. International Hospital Kampala
8. Emergency Care Society of Uganda
9. Mayo Clinic College of Medicine and Science
10. Liverpool John Moores University
11. Karoli Lwanga Hospital
12. The University of Vermont Larner College of Medicine

Corresponding Author:  
Ashley Pickering, MD, MPH  
University of Maryland Medical Center  
Department of Emergency Medicine  
110 S. Paca St, Suite 600  
Baltimore, MD 21201  
[AshleyPickering@gmail.com](mailto:AshleyPickering@gmail.com)

**Word Count:** 3890

**Keywords:**

Low- and Middle-Income Countries  
Uganda  
Emergency Care  
Task-Sharing  
Emergency care training  
Emergency Care Patient Mortality  
Quality Assurance  
Nonphysician Clinician  
Nonphysician Clinician Training  
Nonphysician Clinician Supervision  
Nonphysician Clinician Mortality Outcomes

**Contributorship:**

BR, AP, CL & MB contributed to conception or design of the work; BR, AP, CL, PK, RL, SK, CN, SN, LA & MB contributed to the acquisition, analysis, or interpretation of data for the work and drafting the work or revising it critically for important intellectual content; BR, AP, CL, PK, RL, SK, CN, SN, LA & MB provided final approval prior to publication; BR, AP, CL, PK, RL, SK, CN, SN, LA & MB agree to be accountable for accuracy and integrity of all aspects of the work.

**Funding Statement**

This study received no outside funding.

**Competing of Interests**

There are no competing interests for any author.

**Ethics approval**

Mbarara University of Science and Technology (MUST) Research Ethics Committee No. 11/08-12

**Data sharing**

Data sharing is not allowed under the study IRB Mbarara University of Science and Technology (MUST) Research Ethics Committee No. 11/08-12.

## ABSTRACT

### Introduction

Emergency care capacity is limited by physician shortages in low-income countries like Uganda. Delegating tasks to non-physician clinicians — “Task-sharing” — is a proposed solution. This study assesses whether different levels of emergency medicine physician supervision of non-physician clinician care impacts three-day mortality.

### Methods

Retrospective analysis of an emergency care training program in rural Uganda included three supervision cohorts of patients receiving care from non-physician clinicians: “Direct Supervision” (2009-2010): emergency medicine physicians directly supervised all care; “Indirect Supervision” (2010-2015): emergency medicine physicians were consulted as needed; “Independent Care” (2015-2019): no emergency medicine physician supervision. Multivariable logistic regression models were developed to assess the independent association between supervision cohorts and three-day mortality. Multiple imputation was used for missing data.

### Results

38,033 ED visits met inclusion criteria. Overall mortality decreased significantly across supervision cohorts (3.8% to 3.3% to 2.6%,  $p < 0.001$ ), but so too did the rates of patients presenting with  $\geq 3$  abnormal vitals (32% to 19% to 13%,  $p < 0.001$ ). After controlling for vital sign abnormalities, “Direct” and “Indirect” supervision were significantly independently associated with reduced OR for mortality (“Direct”: 0.57 [0.37-0.90], “Indirect”: 0.71 [0.55 - 0.92]) when compared to “Independent Care”. Sensitivity analysis showed that this mortality benefit was significant for the minority of patients (17.2%) with  $\geq 3$  abnormal vitals (“Direct”: 0.44 [0.22-0.85], “Indirect”: 0.60 [0.41 -0.88]), but not for the majority (82.8%) with 2 or fewer abnormal vitals (“Direct”: 0.81 [0.44-1.49], “Indirect”: 0.82 [0.58 -1.16]).

### Conclusion

Emergency medicine physician supervision of emergency care non-physician clinicians is independently associated with reduced overall mortality. This benefit appears restricted to the highest risk patients based on abnormal vitals. With over 80% of patients having equivalent mortality outcomes with independent non-physician clinician emergency care, a synergistic model providing variable levels of emergency medicine physician supervision or care based on patient acuity could safely address staffing shortages.

## SUMMARY BOX

### What is already known?

- Physician shortages and lack of specialty training limit implementation of emergency care and associated reductions in mortality in low- and middle-income countries such as Uganda.
- Task-sharing, often to non-physician clinicians, is proposed as a solution however data to support safe, effective training and physician supervision protocols is limited.

### What are the new findings?

- The highest risk approximately 15% of emergency care patients – based on abnormal vital signs - have a 50% reduction in mortality when emergency medicine physicians supervise non-physician clinician care.

- For most emergency care patients (the lowest risk approximately 85%) independent emergency care by non-physician clinicians provides similar morality outcomes to care when supervised by an emergency medicine physician.

### What do the new findings imply?

- Training of both emergency care physicians and non-physician clinicians is essential, as physicians provide improved mortality outcomes, especially for the critically ill, and non-physician clinicians will help address lack of trained and available emergency care providers in a timely, cost-effective manner.
- Physician supervision of all emergency care is the ultimate goal, however non-physician clinicians can be trained to provide comparable morality outcomes for the vast majority of patients when practicing independently.
- Triage protocols are needed to identify high-risk emergency care patients, such as those with 3 or more abnormal vital signs, for early involvement of an emergency physician either directly, or through supervision of a non-physician clinician.

## INTRODUCTION

Global recognition of the need to develop emergency care is growing. [1,2] In low- and middle-income countries (LMIC), physician shortages make the provision of medical care and in particular emergency care problematic, with the greatest challenge centered in Sub-Saharan Africa (SSA). [3–5] Emergency care needs remain largely unmet throughout many LMICs, including Uganda. [5–8] Based on the estimate that 57% of deaths occurring in low-income countries are from conditions treatable with emergency care, approximately 160,000 Ugandans' lives could have been saved by provision of emergency care in 2019. [9,10] Emergency care in Uganda is largely limited by physician shortages, as there are 1.68 physicians per 10,000 people, amongst the lowest rates worldwide. [11]. Uganda has placed a priority on developing emergency care over the next five years, estimating that 454 specialist emergency care physicians will be required by 2025. [12] Emergency care specialty training in Uganda began in 2017 and currently certifies between five and 10 Ugandan emergency medicine specialists per year.[13] This leaves an enormous training gap with between 45 and 90 years of training needed to produce emergency medicine specialists to meet the projected five-year staffing demands.

One solution to address physician shortage that has been widely advocated and implemented in SSA is “task-sharing,” or delegating tasks to cadres of new or existing providers, often non-physician clinicians, who do not have the broad-ranging, expensive and lengthy training of physicians. [14–20] The World Health Organization advocates for non-physician clinicians that are “adequately trained, supported and supervised”. [18,20] Though non-physician clinicians are currently providing surgical specialty, obstetric, and HIV care throughout SSA [21–27], there has been limited application of non-physician clinician cadres to offset emergency care provider shortages. [19,28,29] High-income countries have compensated for regionally inadequate physician numbers and uneven distribution of emergency physicians by adopting physician supervised non-physician clinicians in larger emergency units and in some cases non-physician clinician practice with remote physician supervision in smaller rural hospitals. [30–33] Data and protocols to guide implementation of emergency care non-physician clinician training and practice in LMICs, where emergency medicine is largely newly developing, and emergency medicine physicians are typically not available, is highly limited.



1  
2  
3 Few studies exist addressing training of non-physician clinicians for roles in the African  
4 acute care settings outside of trainings focused on specific obstetric, surgical or anesthesia  
5 procedures [34–37], while others find that emergency and acute care training is lacking in non-  
6 physician clinician education in many SSA countries including Uganda. [34,38] There are  
7 documentation a few short-courses designed to teach non-physician clinicians emergency care  
8 skills in SSA. [39–42] While our research group has published on an emergency care non-  
9 physician clinician training program and its associated outcomes, we are not aware of any  
10 additional studies documenting a comprehensive emergency care non-physician clinicians  
11 training program in a LMIC. [29,43–48] Consistent with this limited evidence base, no standards  
12 exist describing if, when or how to transition to reduced supervision or independent non-  
13 physician clinician care following initial training. This represents a major limitation in the ability  
14 to implement non-physician clinician training, supervision and uptake into health systems in a  
15 safe, effective and evidence-based manner.

16  
17  
18 While health systems are evolving in Uganda over the last decade so too is the health of  
19 the general population. Uganda's national crude death rates decreased by 63% across all age  
20 groups (10.2/1000 in 2009 to 6.4/1000 persons in 2019) during the study period. [49]  
21 Concurrently, life expectancy increased by 6.8 years and rates of malaria and HIV infection  
22 decreased. [49]

23  
24 Emergency care has been delivered by non-physician clinicians in Uganda since 2009 in  
25 a training program that has transitioned from directly supervised to independent non-physician  
26 clinician care. The objective of this study was to test the hypothesis that increasing levels of  
27 emergency medicine physician supervision for three cohorts of non-physician clinicians were  
28 independently associated with reduced three-day patient mortality. Logistic regression modelling  
29 was used to control for the changing baseline health of the Ugandan population. Sensitivity  
30 analysis was performed to account for missing data and to attempt to define which populations of  
31 patients had mortality outcomes impacted by physician supervision.

## 32 33 34 **METHODS**

### 35 **Description of Study Site**

36 All data comes from the emergency unit at Karoli Lwanga Hospital, a rural district  
37 hospital located in the town of Nyakibale in the Rukungiri District of southwest Uganda. The  
38 hospital has a six-bed emergency unit that opened in 2008 and treats 300 to 700 patients per  
39 month arriving between 8:00 am and midnight every day of the year. Since 2009, the emergency  
40 unit has been staffed by non-physician clinicians who received training from emergency  
41 medicine physicians working with Global Emergency Care. The non-physician clinicians are  
42 nurses who have completed a two-year advanced training course in emergency care described in  
43 detail elsewhere by Hammerstedt et al [29]. While the course is currently administered in  
44 conjunction with Mbarara University of Science and Technology, the non-physician clinicians in  
45 this cohort study were trained as part of the pilot program that began through a collaboration  
46 between GEC and Karoli Lwanga Hospital. Global Emergency Care (GEC), a US-based 501(c)  
47 [3] non-governmental organization, has run a two-year emergency care specialty non-physician  
48 clinician training program since 2009, and currently does so in collaboration with Mbarara  
49 University of Science and Technology (MUST).

50  
51  
52 Supervision of the non-physician clinicians changed over time generating three cohorts:  
53 “Direct Supervision”, “Indirect Supervision” and “Independent Care”. “Direct Supervision”  
54 occurred from November 2009 - April 2010 when a single US-trained emergency medicine  
55  
56  
57  
58  
59



1  
2  
3 physician practicing with a Ugandan license was on site every day and directly supervised non-  
4 physician clinician care and supplemented with clinical care in a model similar to US residency  
5 training. “Indirect Supervision” occurred from July 2010 - November 2015. During this period a  
6 volunteer US-trained emergency medicine physician was on site for approximately 85% of the  
7 weeks; however, they were present in a teaching role only and provided no direct patient care.  
8 They were available for consultation on an ad hoc basis and consultation was based on non-  
9 physician clinician discretion. “Independent Care” occurred from December 2015 - December  
10 2019, and non-physician clinicians provided clinical care without any onsite emergency  
11 medicine physician. During the entire study period, no Ugandan physicians were assigned to the  
12 emergency unit. Hospital physicians were available in a similar manner throughout the study  
13 period for consultation for patients who required surgery, did not respond to initial treatments, or  
14 in whom there was considerable diagnostic uncertainty. Throughout the study period, non-  
15 physician clinicians admitted patients to the same hospital medical and surgical wards, which  
16 were staffed by Ugandan physicians with standard levels of training and no connection to GEC.  
17 Resource availability was constant over the study period and with resource utilization by  
18 clinicians in this emergency unit described in detail elsewhere. [43]

### 22 **Patient and Public Involvement**

23 The non-physician clinician training program was originally developed in response to  
24 several years of clinical emergency medicine experience and ongoing healthcare staffing  
25 shortages in Uganda. The positive response of patients, staff and administrators at Karoli  
26 Lwanga Hospital to the training program and their interest in improving patient care led to  
27 ongoing research and program evaluation. Patients and the public were not involved in the  
28 design of the study; however, outcome measures are explicitly patient-oriented. Results have  
29 been and will continue to be disseminated through open access publications to allow local  
30 clinicians, administrators, policymakers and researchers to benefit.

### 32 **Data Collection**

33 GEC maintained a group of trained research associates who prospectively collected  
34 quality assurance data on all Karoli Lwanga Hospital emergency unit patient visits. Collected  
35 data included demographics, vital signs, laboratory and radiology testing, disposition, as well as  
36 three-day follow-up vital status (mortality) for all admitted and discharged patients. On the third  
37 day following initial evaluation in the emergency unit, patients admitted to the hospital were  
38 visited in person, and patients discharged from the emergency unit or ward were contacted via  
39 phone. This follow-up protocol included seven consecutive days of calling all patients on the  
40 phone (if they had a phone) before considering them lost to follow-up and is described in detail  
41 elsewhere. [29] Ethics approval for the quality assurance database and waiver of consent was  
42 obtained through the Institutional Review Board at Mbarara University of Science and  
43 Technology (No. 11/08-12). Trained research assistants entered data using Microsoft Excel from  
44 1 January 2010 – 23 March 2012, and Microsoft Access from 24 March 2012 – 31 December  
45 2019.

### 48 **Data Analysis**

49 A cohort study was done using retrospective analysis of prospectively collected data  
50 abstracted from the Karoli Lwanga Hospital emergency unit quality assurance database,  
51 including all consecutive patients presenting to the emergency unit from November 2009 until  
52 December 2019. All patients missing age, gender, disposition and three-day follow up were  
53 excluded from analysis. Patients who were dead on arrival (lacked vital signs with no  
54 resuscitation or interventions attempted) and patients who were transferred or left against  
55  
56  
57  
58  
59

1  
2  
3 medical advice did not receive follow-up by protocol and thus were also excluded from analysis.  
4 All other patients of all ages and dispositions were included. Age, gender, vital signs, malaria  
5 testing, HIV status, gestalt assessment of clinical condition, and year of service were recorded  
6 for all patients. Data was abstracted, cleaned, and analyzed by a single researcher (BR) using  
7 Stata 16.1 (StataCorp, College Station, TX). Missing data was imputed using multiple imputation  
8 by chained equations in Stata. Ten datasets were imputed and combined, with disposition and  
9 age groups used as auxiliary variables to predict missingness based on the results described  
10 below. Because only two months of data existed for 2009, and no data was collected for three  
11 months in 2010 while the program transitioned from “Direct” to “Indirect”, the years 2009 and  
12 2010 were both coded as 2010 for the continuous “Year” variable included in that model. Twelve  
13 variables were included for the final model meeting the minimal criterion of approximately ten  
14 events per variable (n=1,169 events overall).[50] All variables with a univariate p-value less than  
15 0.15 were included in the final model. Area Under Receiver Operating Characteristics Curve  
16 (AUROC), Hosmer-Lemeshow Goodness of Fit, and Brier score were all calculated for logistic  
17 regression models. No a priori power or sample size calculations were performed as all available  
18 records were included in analysis. Continuous variables were tested for significance using one-  
19 way ANOVA and proportions were compared using chi-squared.  
20  
21  
22

## 23 24 **RESULTS**

25 Overall, 49,315 patient visits occurred from 2009 - 2019, and 38,033 (77.1%) met criteria  
26 for inclusion for analysis. Inclusion and exclusion criteria are shown in Figure 1 below.  
27

### 28 **Figure 1: Patient Flow Diagram**

29  
30 Patient characteristics stratified by cohorts of patients receiving non-physician emergency  
31 care with different levels of emergency medicine physician supervision (as described in Methods  
32 above) are shown in Table 1 below.  
33  
34  
35  
36  
37  
38  
39  
40  
41  
42  
43  
44  
45  
46  
47  
48  
49  
50  
51  
52  
53  
54  
55  
56  
57  
58  
59  
60

**Table 1: Patient Characteristics**

| Characteristic                                 | Direct Supervision Cohort (n=1,875) | Indirect Supervision Cohort (n=21,052) | Independent Care Cohort(n=15,106) | P-value  |
|------------------------------------------------|-------------------------------------|----------------------------------------|-----------------------------------|----------|
| <b>Age, mean (SD)</b>                          | 25.9 (23.5)                         | 28.8 (24.1)                            | 32.9 (24.9)                       | < 0.001* |
| <b>Age Group</b>                               |                                     |                                        |                                   |          |
| Under 5, % (n)                                 | 26.7% (501)                         | 21.2% (4454)                           | 14.5% (2196)                      | < 0.001  |
| 5-17 y.o., % (n)                               | 15.2% (285)                         | 15.8% (3325)                           | 14.7% (2219)                      |          |
| 18-64 y.o., % (n)                              | 48.3% (910)                         | 51.7% (10890)                          | 56.5% (8538)                      |          |
| >= 65 y.o., % (n)                              | 9.6% (179)                          | 11.3% (2383)                           | 14.3% (2153)                      |          |
| <b>HIV-positive , % (n)</b>                    | 1.9% (35)                           | 5.6% (1182)                            | 6.9% (1045)                       | < 0.001  |
| <b>Malaria parasites on blood smear, % (n)</b> | 24.5% (460)                         | 18.5% (3903)                           | 5.6% (848)                        | < 0.001  |
| <b>Gender - Female, % (n)</b>                  | 47.9% (898)                         | 46.2% (9719)                           | 46.6% (7046)                      | 0.29     |
| <b>Complete Vital Signs</b>                    |                                     |                                        |                                   |          |
| Under 5 Years Old, %(n)                        | 36.1% (190)                         | 8.5% (401)                             | 8.5% (205)                        | <0.001   |
| 5-12 Years Old, %(n)                           | 79.6% (86)                          | 57.8% (758)                            | 49.8% (444)                       | <0.001   |
| 13 Years and Older, %(n)                       | 88.1% (1092)                        | 87.8% (13163)                          | 90.4% (10672)                     | <0.001   |
| <b>Vital Sign Abnormalities</b>                |                                     |                                        |                                   |          |
| <b>Blood Pressure</b>                          |                                     |                                        |                                   |          |
| Normal, % (n)                                  | 58.2% (1,092)                       | 63.5% (13,368)                         | 72.6% (10,959)                    | <0.001   |
| Hypotensive, % (n)                             | 21.4%(401)                          | 12.0% (2,528)                          | 7.9% (1,194)                      |          |
| Missing, % (n)                                 | 20.4% (382)                         | 24.5% (5,156)                          | 19.6% (2,953)                     |          |
| <b>Respiratory Rate</b>                        |                                     |                                        |                                   |          |

|                   |                    |               |                |                |        |
|-------------------|--------------------|---------------|----------------|----------------|--------|
|                   | Normal, % (n)      | 38.9% (730)   | 53.5% (11,266) | 66.2% (10,000) |        |
|                   | Tachypnea, % (n)   | 52.8% (990)   | 43.3% (9,121)  | 27.7% (4,181)  | <0.001 |
|                   | Missing, % (n)     | 8.27% (155)   | 3.16%(665)     | 6.12%(925)     |        |
| Oxygen Saturation |                    |               |                |                |        |
|                   | Normal, % (n)      | 83.7% (1,569) | 80.6% (16,965) | 84.2% (12,722) |        |
|                   | Hypoxic, % (n)     | 13.2% (248)   | 12.0% (2,533)  | 12.7% (1,915)  | <0.001 |
|                   | Missing, % (n)     | 3.1% (58)     | 7.4% (1,554)   | 3.1%(469)      |        |
| Heart Rate        |                    |               |                |                |        |
|                   | Normal, % (n)      | 48.9%(971)    | 62.5% (13,161) | 64.2% (9,703)  |        |
|                   | Tachycardic, % (n) | 49.0%. (918)  | 36.6% (7,695)  | 33.8% (5,112)  | <0.001 |
|                   | Missing, % (n)     | 2.1%(40)      | 0.9%(196)      | 1.93%(291)     |        |
| Temperature       |                    |               |                |                |        |
|                   | Normal, % (n)      | 38.4%. (719)  | 55.3% (11,646) | 54.6% (8,250)  |        |
|                   | Hypothermic, % (n) | 35.7%. (670)  | 27.5% (5,779)  | 29.4% (4,444)  | <0.001 |
|                   | Febrile, % (n)     | 22.4%(420)    | 15.7% (3,304)  | 13.6% (2,049)  |        |
|                   | Missing, % (n)     | 3.5% (66)     | 1.5% (323)     | 2.4% (363)     |        |

\* ANOVA used for significance test; all others use chi-squared

There were significant differences in every characteristic across the cohorts except for gender. As the study progressed there were fewer pediatric patients, more adult and elderly patients, fewer patients with malaria, more patients with HIV, and more patients with abnormal vitals. Missingness was relatively low for all vital signs (0.9% - 8.3%) except blood pressure which had a much higher rate of missingness (19.6% - 24.5%). That missingness was almost entirely restricted to the pediatric population (0-5 Years Old: 88.6% [n=6,803] missing blood pressure, 6-12 Years Old: 39.9% (n=922] missing blood pressure, 13 Years and Older: 2.7% [n=766] missing blood pressure).

The three-day mortality for the program overall (2009-2019) was 3.1% (n=1,169 deaths), and mortality decreased significantly as the program transitioned from “Direct Supervision” to “Indirect Supervision” to “Independent Care” (3.8% [n=72], 3.3% [n=698], 2.6% [n=399] respectively,  $p<0.001$ ). Simultaneously, across those time periods patients presented with significantly fewer abnormal vital signs (Figure 2). Over the entire program, mortality increased monotonically with each additional abnormal vital sign (Zero Abnormal = 0.7% [n=66], One Abnormal=1.7% [n=222], Two Abnormal=3.4% [n=321], Three or more=8.6% [n=561],  $p<0.001$ ).

### Figure 2: Mortality and vital sign abnormalities across supervision cohorts

Given this changing baseline in patient mortality and prevalence of vital sign abnormalities, a logistic regression model was developed to determine whether “Direct Supervision” and/or “Indirect Supervision” was independently associated with increased or decreased mortality as compared to “Independent Care”.

The development of this model incorporated the finding that there was a strong association with missing vital signs and mortality with a monotonic increase in mortality for each missing vital sign (Zero Missing: 2.7% [n=746], One Missing: 3.3% [n=319], Two Missing: 7.0% [n=66], Three or more Missing: 7.5% [n=38],  $p<0.001$ ). The highest mortality population (“Expired in ED” with 100% mortality) had over half the patients (55.4%, n=103) missing one or more vitals. Therefore, when we attempted complete case analysis for logistic regression, only 70.7% of patients (n=26,869) were included in the model (including only 9.7% of children under five years old) and only 63.4% (n=741) of deaths were included. Therefore, complete case analysis was rejected in favor of multiple imputation (complete case analysis results are available as Appendix 1 and Appendix 2).

Using multiple imputation by chained equations over ten datasets (as described in Methods), we were able to produce a logistic regression model that included all 38,033 patients (Table 2).

### Table 2: Logistic Regression Model of Mortality Comparing Supervision Cohorts

|                          |            | Multiple Imputation (n=38,033) |        |        |         |
|--------------------------|------------|--------------------------------|--------|--------|---------|
|                          |            | OR                             | 95% CI |        | p-Value |
| <b>Age Group</b>         |            |                                |        |        |         |
|                          | Under 5    | 1.29                           | 0.77   | - 1.14 | 0.008   |
|                          | 5-12 y.o.  | 0.49                           | 0.55   | - 0.90 | <0.001  |
|                          | 18-64 y.o. | REF                            |        |        |         |
|                          | >=65 y.o.  | 1.63                           | 1.37   | - 1.93 | <0.001  |
| <b>HIV</b>               |            |                                |        |        |         |
|                          | Negative   | REF                            |        |        |         |
|                          | Positive   | 1.84                           | 1.51   | - 2.25 | <0.001  |
| <b>Malaria</b>           |            |                                |        |        |         |
|                          | Negative   | REF                            |        |        |         |
|                          | Positive   | 0.93                           | 0.78   | - 1.12 | 0.708   |
| <b>Gender</b>            |            |                                |        |        |         |
|                          | M          | REF                            |        |        |         |
|                          | F          | 0.71                           | 0.62   | - 0.80 | <0.001  |
| <b>Oxygen Saturation</b> |            |                                |        |        |         |
|                          | Normal     | REF                            |        |        |         |
|                          | Hypoxic    | 2.95                           | 2.55   | - 3.41 | <0.001  |
| <b>Respiratory Rate</b>  |            |                                |        |        |         |
|                          | Normal     | REF                            |        |        |         |

1  
2  
3  
4  
5  
6  
7  
8  
9  
10  
11  
12  
13  
14  
15  
16  
17  
18  
19  
20  
21  
22  
23  
24  
25  
26  
27  
28  
29  
30  
31  
32  
33  
34  
35  
36  
37  
38  
39  
40  
41  
42  
43  
44  
45  
46  
47

|                     |      |      |   |      |        |
|---------------------|------|------|---|------|--------|
| Tachypnea           | 1.82 | 1.58 | - | 2.11 | <0.001 |
| Heart Rate          |      |      |   |      |        |
| Normal              | REF  |      |   |      |        |
| Tachycardic         | 1.18 | 1.03 | - | 1.36 | 0.02   |
| Blood Pressure      |      |      |   |      |        |
| Normotensive        | REF  |      |   |      |        |
| Hypotensive         | 1.65 | 1.39 |   | 1.96 | 0.027  |
| Temperature         |      |      |   |      |        |
| Normal              |      |      |   |      |        |
| Hypothermic         | 2.09 | 1.81 | - | 2.42 | <0.001 |
| Febrile             | 0.80 | 0.66 | - | 0.98 | 0.034  |
| Year                | 0.90 | 0.86 | - | 0.95 | <0.001 |
| Clinical Impression |      |      |   |      |        |
| "Not Sick"          |      |      |   |      |        |
| "Sick"              | 4.81 | 3.91 | - | 5.90 | <0.001 |
| "Toxic"             | 35.6 | 27.8 | - | 45.5 | <0.001 |
| Supervision         |      |      |   |      |        |
| Independent         | REF  |      |   |      |        |
| Direct              | 0.57 | 0.37 | - | 0.90 | 0.015  |
| Indirect            | 0.71 | 0.55 | - | 0.92 | 0.01   |

view only

1  
2  
3  
4  
5  
6 This model had excellent discrimination (AUROC : 0.87 [0.85 – 0.88]), goodness of fit  
7 (Hosmer-Lemeshow: 0.991) and accuracy (Brier score: 0.256). This model found that both  
8 “Direct” and “Indirect” supervision were significantly independently associated with reduced OR  
9 for mortality (“Direct”: 0.57 [0.37-0.90], “Indirect”: 0.71 [0.55 -0.92]) when compared to  
10 “Independent Care”. As a sensitivity analysis, patients with and without three or more abnormal  
11 vital signs were analyzed separately (Figure 3).  
12

### 13 **Figure 3: Odds Ratios for Mortality comparing Direct Supervision and Indirect** 14 **Supervision to Independent Care** 15

16  
17 For the minority of patients with three or more abnormal vital signs (17.2%, n=6,451),  
18 both “Direct” and “Indirect” supervision were significantly independently associated with  
19 reduced OR for mortality (“Direct”: 0.44 [0.22-0.85], “Indirect”: 0.60 [0.41 -0.88]). However,  
20 for the majority of patients who had two or fewer abnormal vital signs (82.8%, n=31,492) there  
21 was no significant difference in OR for mortality (“Direct”: 0.81 [0.44-1.49], “Indirect”: 0.82  
22 [0.58 -1.16]).  
23  
24

## 25 **DISCUSSION**

26 This study of a non-physician clinician emergency care training program in rural Uganda  
27 demonstrates that direct and indirect supervision by emergency medicine physicians reduced  
28 overall mortality as compared to independent non-physician clinician emergency care.  
29 Sensitivity analysis showed this benefit was restricted to the most severely ill subset of patients –  
30 as defined by abnormal vitals – with independent non-physician clinician care having similar  
31 outcomes to physician-supervised care for the vast majority of patients. These findings are  
32 consistent with a prior study by our author group showing the mortality benefit for direct  
33 emergency medicine physician supervision was restricted to the most severely ill subset of  
34 children under 5 years of age [46]. We are not aware of any other studies addressing mortality  
35 rates of patients cared for by emergency care specialty trained non-physician clinicians in similar  
36 LMIC settings. This finding has potentially profound implications for policy to maximize  
37 workforce potential in the rapidly developing field of emergency care in Uganda and in similar  
38 settings.  
39  
40

41 One of the fundamental challenges of our analysis was the rapidly changing background  
42 of the health system in Uganda during the study period (2009-2019). Many of the most profound  
43 shifts seen in our study likely reflect the overall changes in Ugandan health care. As shown in  
44 Figure 2, overall mortality significantly ( $p < 0.001$ ) decreased by almost 70% during the study  
45 period. While impressive, this finding is consistent with the 63% reduction in national crude  
46 death rate during the study period [49]. Similarly, we saw many demographic shifts in our  
47 population over time (Table 1) including fewer emergencies in children under 5, more elderly  
48 patients and reduced rates of malaria. Again, these are consistent with Ugandan national trends  
49 over that time period.[49]  
50

51 Logistic regression models were developed control for confounding variables. As  
52 mentioned in Results, high rates of missing data for the highest mortality patients and children  
53 under five years old made complete-case analysis a poor fit for our data set. Multiple imputation  
54 was eventually selected as the optimal method for handling missing data.[51,52] Single  
55  
56  
57  
58  
59  
60



(deterministic) imputation models were developed but ultimately discarded based on poor performance. The multiple imputation model had excellent characteristics (discrimination, goodness of fit, and accuracy) and showed that both “Direct Supervision” and “Indirect Supervision” reduced program mortality overall as compared to “Independent Care”. This is an expected finding, as no argument exists in this manuscript or elsewhere suggesting complete equality between physician and non-physician clinician training, practice or outcomes. Rather, this finding clearly highlights the importance of the scaling-up of the ongoing emergency medicine physician training efforts in Uganda to reduce mortality in emergencies nationwide.

While emergency medicine physician care for all emergency patients is ideal, the current rate of emergency medicine specialist training, health system funding, and high demand for emergency medicine specialist physicians at training institutions and in administrative roles, means that the ideal of emergency medicine specialist clinical care in emergency units throughout Uganda may be decades away from being realized. Therefore, optimizing the role of non-physician clinicians can help address the current gap between emergency care patients and providers.

Sensitivity analysis was performed to attempt to identify which subset of patients might benefit most from physician supervision. With prior studies showing the benefit of direct physician supervision of non-physicians was limited to severely ill pediatric patients, our sensitivity analysis involved stratifying by vital signs.[46] We found that minority of patients with three or more abnormal vital signs (16.7%, n=6,541) had significantly reduced OR of mortality, and that reduction was enough to create a significant mortality impact for those supervision cohorts overall. However, when the majority of patients with two or fewer abnormal vital signs were looked at separately there was no significant reduction in mortality when comparing either “Direct Supervision” or “Indirect Supervision” to “Independent Care”. We believe this finding could be used at triage to immediately identify patients most likely to receive benefit from emergency medicine physician supervision in clinical situations where that resource is too limited to be provided for all patients.

We strongly support the ongoing development of emergency medicine specialty training for physicians in Uganda to help achieve the ultimate goal of providing emergency medicine physician clinical care for all patients. However, current emergency care staffing shortages in Uganda and elsewhere in Sub-Saharan Africa are likely to persist for decades to come. Augmenting the physician workforce with emergency care specialty-trained non-physician clinicians — who can be trained more rapidly, at a lower cost, and are more likely to work in rural areas — is a clear path forward to addressing the immediate emergency care needs faced by millions of Ugandans today.[3,20,38,53] Our analysis shows that a synergy between these groups is possible: non-physician clinicians can safely deliver independent care for the majority of less severely ill patients without causing excess mortality, while emergency medicine physicians can provide or supervise non-physician clinician care to reduce mortality for the most severely ill subset of patients.

### **Limitations**

This is a single center, retrospective study of an emergency unit database. Mortality follow-up was limited to three days. While one week and one month mortality is undoubtedly important, three-day follow-up was chosen both to minimize loss to follow-up in a setting where most patients do not have consistent ability to receive phone calls and because follow-up after three days was thought to be less reflective of outcomes related to acute care provided in the emergency unit. Inpatient mortality was affected not just by emergency unit care but also by

hospital ward care. However, this care was provided similarly throughout the study, making it unlikely to bias outcomes in comparisons between cohorts. Multiple imputation is a widely accepted method for dealing with missing data, but even with auxiliary variables used to improve the likelihood of meeting the missing at random assumption, any approach to missing data is imperfect with multiple imputation being no exception. Lastly, there was a high loss to follow-up in discharged patients over the duration of the study (47.7%, n=8,110). Most of this loss to follow was due to lack of phones for the discharged patients (Had no phone: 82.3%, n=6,592; Invalid number: 6.9%, n=553) with only 10.7% (n=856) being loss to follow up for other reasons. However, with a mortality rate of 0.07% (n=6 deaths in 8,906 discharges) in discharged patients with complete follow-up, it is highly unlikely that the 8,110 discharged patients lost to follow-up represent a significant number of fatal cases excluded from our analysis. The 6.3% loss to follow-up rate for admitted and direct to theatre patients was otherwise considered adequate given the challenges of emergency unit data collection in Sub-Saharan Africa.

## CONCLUSIONS

This manuscript shows that task-sharing of emergency care specialty-trained non-physician clinicians to address emergency care staffing shortages is both efficient and safe for the vast majority of patient encounters. As Uganda strives to reach the goal of consistent emergency medicine physician coverage of emergency units, operationalizing a hybrid model with emergency medicine physician supervision of otherwise independent non-physician clinician care for the sickest emergency care patients has the potential to save lives. Based on the robust evidence base we report above, the authors' recommendations are as follows:

1. Scale up emergency medicine physician development and training: The highest risk approximately 15% of patients had nearly a 50% reduction in mortality with physician involvement, and direct supervision significantly reduced overall mortality.
2. Increase capacity for emergency care NCP training: emergency care non-physician clinicians provided independent care comparable to care given with emergency medicine physician supervision for approximately 85% of patients over the study period.
3. Create triage protocols for early identification of the highest risk patients: in our analysis patients with three or more abnormal vital signs were most likely to derive benefit from emergency medicine physician clinical care or supervision of non-physician clinician care.
4. Create clear protocols and systems to provide emergency care non-physician clinicians with direct supervision in person or via phone/telehealth consultation by emergency medicine physician for patients at high-risk of mortality.

**BIBLIOGRAPHY**

- 1 World Health Assembly 72. Emergency care systems for universal health coverage: ensuring timely care for the acutely ill and injured. Geneva: World Health Organization 2019. <https://apps.who.int/iris/handle/10665/329363>
- 2 World Health Assembly 60. Health systems: emergency-care systems. Geneva: World Health Organization 2007. <https://apps.who.int/iris/handle/10665/22596>
- 3 Asamani JA, Akogun OB, Nyoni J, *et al.* Towards a regional strategy for resolving the human resources for health challenges in Africa. *BMJ Global Health* 2019;**4**:e001533. doi:10.1136/bmjgh-2019-001533
- 4 World Health Organization. Working together for health : the world health report 2006 : overview. *Travailler ensemble pour la santé : rapport sur la santé dans le monde 2006 : résumé* Published Online First: 2006.<https://apps.who.int/iris/handle/10665/69256>
- 5 Calvello E, Reynolds T, Hirshon JM, *et al.* Emergency care in sub-Saharan Africa: Results of a consensus conference. *African Journal of Emergency Medicine* 2013;**3**:42–8. doi:10.1016/j.afjem.2013.01.001
- 6 Ningwa A, Muni K, Oporia F, *et al.* The state of emergency medical services and acute health facility care in Uganda: findings from a National Cross-Sectional Survey. *BMC Health Services Research* 2020;**20**:1–10.
- 7 Chang CY, Abujaber S, Reynolds TA, *et al.* Burden of emergency conditions and emergency care usage: new estimates from 40 countries. *Emerg Med J* 2016;**33**:794–800. doi:10.1136/emered-2016-205709
- 8 Obermeyer Z, Abujaber S, Makar M, *et al.* Emergency care in 59 low-and middle-income countries: a systematic review. *Bulletin of the World Health Organization* 2015;**93**:577–86.
- 9 Razzak J, Usmani MF, Bhutta ZA. Global, regional and national burden of emergency medical diseases using specific emergency disease indicators: analysis of the 2015 Global Burden of Disease Study. *BMJ Global Health* 2019;**4**. doi:10.1136/bmjgh-2018-000733
- 10 Uganda | Data. <https://data.worldbank.org/country/UG> (accessed 8 Aug 2021).
- 11 Medical doctors (per 10 000 population). [https://www.who.int/data/gho/data/indicators/indicator-details/GHO/medical-doctors-\(per-10-000-population\)](https://www.who.int/data/gho/data/indicators/indicator-details/GHO/medical-doctors-(per-10-000-population)) (accessed 8 Aug 2021).
- 12 THIRD NATIONAL DEVELOPMENT PLAN (NDPIII) 2020/21 – 2024/25. Ugandan National Planning Authority [http://www.npa.go.ug/wp-content/uploads/2020/08/NDPIII-Finale\\_Compressed.pdf](http://www.npa.go.ug/wp-content/uploads/2020/08/NDPIII-Finale_Compressed.pdf) (accessed 10 Sep 2021).
- 13 Kizito P. The total number of Ugandan MMedS enrolled in training. 2021.

- 1  
2  
3  
4  
5  
6  
7  
8  
9  
10  
11  
12  
13  
14  
15  
16  
17  
18  
19  
20  
21  
22  
23  
24  
25  
26  
27  
28  
29  
30  
31  
32  
33  
34  
35  
36  
37  
38  
39  
40  
41  
42  
43  
44  
45  
46  
47  
48  
49  
50  
51  
52  
53  
54  
55  
56  
57  
58  
59  
60
- 14 Eyal N, Cancedda C, Kyamanywa P, *et al.* Non-physician Clinicians in Sub-Saharan Africa and the Evolving Role of Physicians. *Int J Health Policy Manag* 2015;**5**:149–53. doi:10.15171/ijhpm.2015.215
  - 15 Fulton BD, Scheffler RM, Sparkes SP, *et al.* Health workforce skill mix and task shifting in low income countries: a review of recent evidence. *Human resources for health* 2011;**9**:1.
  - 16 Lehmann U, Van Damme W, Barten F, *et al.* Task shifting: the answer to the human resources crisis in Africa? *Human Resources for Health* 2009;**7**:49. doi:10.1186/1478-4491-7-49
  - 17 Mullan F, Frehywot S. Non-physician clinicians in 47 sub-Saharan African countries. *The Lancet* 2007;**370**:2158–63. doi:10.1016/S0140-6736(07)60785-5
  - 18 World Health Organization, PEPFAR, UNAIDS. Task shifting : rational redistribution of tasks among health workforce teams : global recommendations and guidelines. Published Online First: 2007. <https://apps.who.int/iris/handle/10665/43821>
  - 19 Terry B, Bisanzo M, McNamara M, *et al.* Task shifting: meeting the human resources needs for acute and emergency care in Africa. *African Journal of Emergency Medicine* 2012;**2**:182–7.
  - 20 World Health Organization. Regional Office for South-East Asia. Mid-level health workers: a review of the evidence. New Delhi: : World Health Organization. Regional Office for South-East Asia 2018. <https://apps.who.int/iris/handle/10665/259878>
  - 21 Bergström S. Training non-physician mid-level providers of care (associate clinicians) to perform caesarean sections in low-income countries. *Best Practice & Research Clinical Obstetrics & Gynaecology* 2015;**29**:1092–101. doi:10.1016/j.bpobgyn.2015.03.016
  - 22 Gajewski J, Cheelo M, Bijlmakers L, *et al.* The contribution of non-physician clinicians to the provision of surgery in rural Zambia—a randomised controlled trial. *Human Resources for Health* 2019;**17**:60. doi:10.1186/s12960-019-0398-9
  - 23 Wilhelm TJ, Thawe IK, Mwatibu B, *et al.* Efficacy of major general surgery performed by non-physician clinicians at a central hospital in Malawi. *Trop Doct* 2011;**41**:71–5. doi:10.1258/td.2010.100272
  - 24 Wilhelm TJ, Dzimbiri K, Sembereka V, *et al.* Task-shifting of orthopaedic surgery to non-physician clinicians in Malawi: effective and safe? *Tropical doctor* 2017;**47**:294–9.
  - 25 Gessesew A, Barnabas GA, Prata N, *et al.* Task shifting and sharing in Tigray, Ethiopia, to achieve comprehensive emergency obstetric care. *International Journal of Gynecology & Obstetrics* 2011;**113**:28–31. doi:10.1016/j.ijgo.2010.10.023
  - 26 Nyamtema AS, Pemba SK, Mbaruku G, *et al.* Tanzanian lessons in using non-physician clinicians to scale up comprehensive emergency obstetric care in remote and rural areas. *Human Resources for Health* 2011;**9**:28. doi:10.1186/1478-4491-9-28

- 1  
2  
3 27 Beard JH, Oresanya LB, Akoko L, *et al.* Surgical Task-Shifting in a Low-Resource Setting:  
4 Outcomes After Major Surgery Performed by Nonphysician Clinicians in Tanzania. *World J*  
5 *Surg* 2014;**38**:1398–404. doi:10.1007/s00268-013-2446-2  
6  
7 28 Chamberlain S, Stolz U, Dreifuss B, *et al.* Mortality related to acute illness and injury in  
8 rural Uganda: task shifting to improve outcomes. *PloS one* 2015;**10**:e0122559.  
9  
10 29 Hammerstedt H MD, MPH, Maling S MBChB, Kasyaba R MBChB, *et al.* Addressing World  
11 Health Assembly Resolution 60.22: A Pilot Project to Create Access to Acute Care Services  
12 in Uganda. *Annals of Emergency Medicine* 2014;**64**:461–8.  
13 doi:10.1016/j.annemergmed.2014.01.035  
14  
15 30 Guidelines Regarding the Role of Physician Assistants and Nurse Practitioners in the  
16 Emergency Department. [https://www.acep.org/patient-care/policy-statements/guidelines-](https://www.acep.org/patient-care/policy-statements/guidelines-regarding-the-role-of-physician-assistants-and-nurse-practitioners-in-the-emergency-department/)  
17 [regarding-the-role-of-physician-assistants-and-nurse-practitioners-in-the-emergency-](https://www.acep.org/patient-care/policy-statements/guidelines-regarding-the-role-of-physician-assistants-and-nurse-practitioners-in-the-emergency-department/)  
18 [department/](https://www.acep.org/patient-care/policy-statements/guidelines-regarding-the-role-of-physician-assistants-and-nurse-practitioners-in-the-emergency-department/) (accessed 8 Aug 2021).  
19  
20 31 Hooker RS, Klocko DJ, Larkin GL. Physician Assistants in Emergency Medicine: The  
21 Impact of Their Role. *Academic Emergency Medicine* 2011;**18**:72–7. doi:10.1111/j.1553-  
22 2712.2010.00953.x  
23  
24 32 Doan Q, Sabhaney V, Kissoon N, *et al.* A systematic review: The role and impact of the  
25 physician assistant in the emergency department. *Emergency Medicine Australasia*  
26 2011;**23**:7–15. doi:10.1111/j.1742-6723.2010.01368.x  
27  
28 33 Yordanov Y, Chouihed T, Riou B, *et al.* Task shifting and emergency nurse practitioners –  
29 are nurses the future of emergency medicine?: the French experience. *European Journal of*  
30 *Emergency Medicine* 2020;**27**:9–10. doi:10.1097/MEJ.0000000000000664  
31  
32 34 Couper I, Ray S, Blaauw D, *et al.* Curriculum and training needs of mid-level health workers  
33 in Africa: a situational review from Kenya, Nigeria, South Africa and Uganda. *BMC Health*  
34 *Services Research* 2018;**18**:553. doi:10.1186/s12913-018-3362-9  
35  
36 35 Freistadt F, Branigan E, Pupp C, *et al.* A framework for revising preservice curriculum for  
37 nonphysician clinicians: The mozambique experience. *Education for Health* 2014;**27**:283.  
38 doi:10.4103/1357-6283.152190  
39  
40 36 Rick TJ, Moshi DD. The Tanzanian assistant medical officer. *Journal of the American*  
41 *Academy of PAs* 2018;**31**:43–7.  
42  
43 37 Yasmin F, Schultz A, Phiri A, *et al.* “I Need to Be the First One With a Different Approach  
44 and to Make a Difference to the People”-Transforming Pediatric Training for Non-physician  
45 Clinicians in Malawi: A Mixed-method Study. 2020.  
46  
47 38 Zhao Y, Hagel C, Tweheyo R, *et al.* Task-sharing to support paediatric and child health  
48 service delivery in low- and middle-income countries: current practice and a scoping review  
49 of emerging opportunities. *Human Resources for Health* 2021;**19**:95. doi:10.1186/s12960-  
50 021-00637-5  
51  
52  
53  
54  
55  
56  
57  
58  
59



- 1  
2  
3 39 Byrne-Davis LMT, Jackson MJ, McCarthy R, *et al.* A pre-post study of behavioural  
4 determinants and practice change in Ugandan clinical officers. *African Journal of Health*  
5 *Professions Education* 2018;**10**:220–7.  
6  
7  
8 40 Fant CD, Schwartz KR, Patel H, *et al.* Developing and Implementing a Pediatric Emergency  
9 Care Curriculum for Providers at District Level Hospitals in Sub-Saharan Africa: A Case  
10 Study in Kenya. *Front Public Health* 2017;**5**:322. doi:10.3389/fpubh.2017.00322  
11  
12 41 James DR, Barling J, Ross O, *et al.* G293 (P) Towards emergency triage assessment and  
13 treatment (ETAT)++: introducing basic paediatric trauma management skills in rural ghana.  
14 *Archives of Disease in Childhood* 2019;**104**:A120.  
15  
16 42 Niyogi A, Villona B, Rubenstein BL, *et al.* In-service training of physician assistants in acute  
17 care in Ghana: Challenges, successes, and lessons learned. *African Journal of Emergency*  
18 *Medicine* 2015;**5**:114–9. doi:10.1016/j.afjem.2015.01.006  
19  
20 43 Bitter CC, Rice B, Periyayagam U, *et al.* What resources are used in emergency  
21 departments in rural sub-Saharan Africa? A retrospective analysis of patient care in a  
22 district-level hospital in Uganda. *BMJ Open* 2018;**8**:e019024. doi:10.1136/bmjopen-2017-  
23 019024  
24  
25 44 Colella M, Bisanzo M, Farquhar C, *et al.* Implementation and evaluation of an innovative  
26 leadership and teacher training program for non-physician emergency medicine practitioners  
27 in Uganda. *African Journal of Emergency Medicine* 2019;**9**:25–9.  
28 doi:10.1016/j.afjem.2018.12.002  
29  
30 45 Dresser C, Periyayagam U, Dreifuss B, *et al.* Management and Outcomes of Acute  
31 Surgical Patients at a District Hospital in Uganda with Non-physician Emergency Clinicians.  
32 *World Journal of Surgery* 2017;**41**:2193–9. doi:10.1007/s00268-017-4014-7  
33  
34 46 Rice B, Periyayagam U, Chamberlain S, *et al.* Mortality in Children Under Five Receiving  
35 Nonphysician Clinician Emergency Care in Uganda. *Pediatrics* 2016;**137**:e20153201–  
36 e20153201. doi:10.1542/peds.2015-3201  
37  
38 47 Rice B, Leanza J, Mowafi H, *et al.* Defining high-risk emergency chief complaints:  
39 data-driven triage for low-and middle-income countries. *Academic Emergency Medicine*  
40 2020;**27**:1291–301.  
41  
42 48 Rybarczyk MM, Ludmer N, Broccoli MC, *et al.* Emergency Medicine Training Programs in  
43 Low- and Middle-Income Countries: A Systematic Review. *Ann Glob Health*;**86**.  
44 doi:10.5334/aogh.2681  
45  
46 49 Uganda - World Bank Open Data. The World Bank <https://data.worldbank.org/country/UG>  
47 (accessed 4 Sep 2021).  
48  
49 50 Vittinghoff E, McCulloch CE. Relaxing the Rule of Ten Events per Variable in Logistic and  
50 Cox Regression. *American Journal of Epidemiology* 2007;**165**:710–8.  
51 doi:10.1093/aje/kwk052  
52  
53  
54  
55  
56  
57  
58  
59  
60

- 1  
2  
3 51 Mackinnon A. The use and reporting of multiple imputation in medical research—a review.  
4 *Journal of internal medicine* 2010;**268**:586–93.  
5  
6  
7 52 Johnson DR, Young R. Toward Best Practices in Analyzing Datasets with Missing Data:  
8 Comparisons and Recommendations. *Journal of Marriage and Family* 2011;**73**:926–45.  
9 doi:10.1111/j.1741-3737.2011.00861.x  
10  
11 53 Seidman G, Atun R. Does task shifting yield cost savings and improve efficiency for health  
12 systems? A systematic review of evidence from low-income and middle-income countries.  
13 *Human Resources for Health* 2017;**15**:29. doi:10.1186/s12960-017-0200-9  
14  
15  
16  
17  
18  
19  
20  
21  
22  
23  
24  
25  
26  
27  
28  
29  
30  
31  
32  
33  
34  
35  
36  
37  
38  
39  
40  
41  
42  
43  
44  
45  
46  
47  
48  
49  
50  
51  
52  
53  
54  
55  
56  
57  
58  
59  
60

**Excluded**

- 1 **1. Disposition missing:** n = 191 (0.4%)
- 2 **2. Age missing:** n = 275 (0.6%)
- 3 **3. Gender missing:** n = 30 (0.06%)
- 4 **4. Disposition:** n=721 (1.5%)
- 5 including: DOA, n = 33
- 6 AMA, n= 131
- 7 Escaped, n= 65
- 8 Referred, n = 492
- 9 **5. Lost to follow up:** n = 10,065 (20.4%)
- 10 including: Discharged, n= 8,110
- 11 Admitted, n= 1,918
- 12 Theatre, n= 37

**Total visits**

n = 49,315

**Total visits for analysis**

n = 38,033

**Direct Supervision**

November 2009 - April 2010

**n = 1,875 (4.93%)**

Admit: 1,425 (76.0%)

Discharge: 421 (22.5%)

Expired in the ED: 15 (0.8%)

Theatre: 14 (0.75%)

**Indirect Supervision**

July 2010 - November 2015

**n = 21,052 (55.35%)**

Admit: 15,578 (74.0%)

Discharge: 5,233 (24.9%)

Expired in the ED: 115 (0.8%)

Theatre: 126 (0.6%)

**Independent Care**

December 2015 - December 2019

**n = 15,106 (39.72%)**

Admit: 11,647 (77.1%)

Discharge: 3,252 (21.5%)

Expired in the ED: 56 (0.4%)

Theatre: 151 (1%)



1  
2  
3  
4  
5  
6  
7  
8  
9  
10  
11  
12  
13  
14  
15  
16  
17  
18  
19  
20  
21  
22  
23  
24  
25  
26  
27  
28  
29  
30  
31  
32  
33  
34  
35  
36  
37  
38  
39  
40  
41  
42  
43  
44  
45  
46  
47  
48  
49  
50  
51  
52  
53  
54  
55  
56  
57  
58  
59  
60

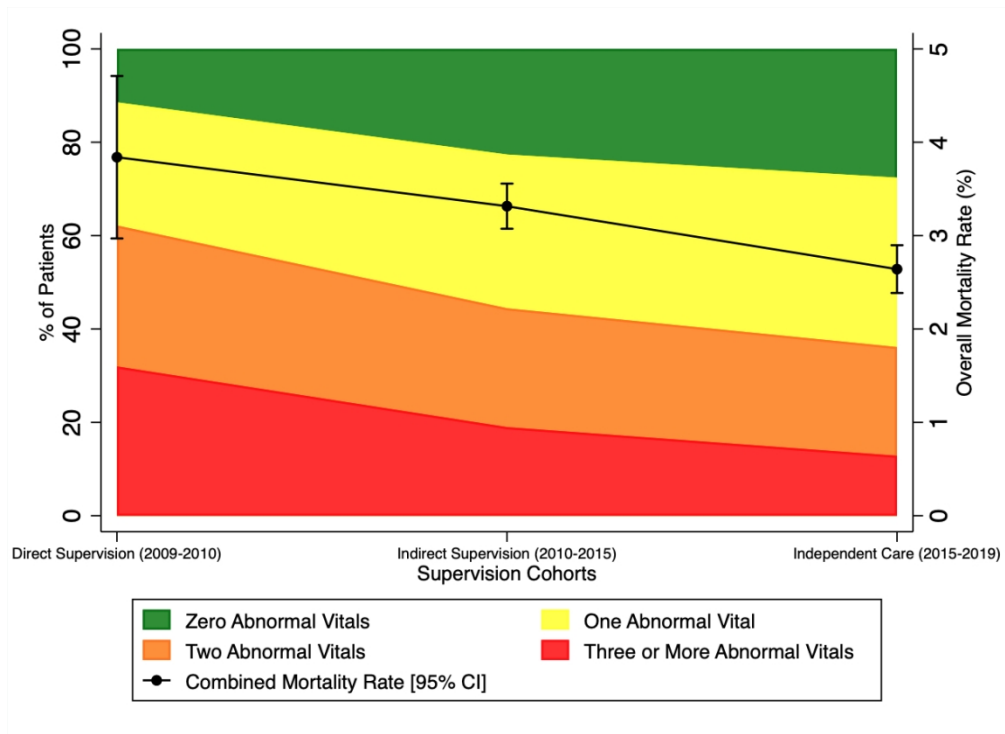

442x322mm (72 x 72 DPI)

1  
2  
3  
4  
5  
6  
7  
8  
9  
10  
11  
12  
13  
14  
15  
16  
17  
18  
19  
20  
21  
22  
23  
24  
25  
26  
27  
28  
29  
30  
31  
32  
33  
34  
35  
36  
37  
38  
39  
40  
41  
42  
43  
44  
45  
46  
47  
48  
49  
50  
51  
52  
53  
54  
55  
56  
57  
58  
59  
60

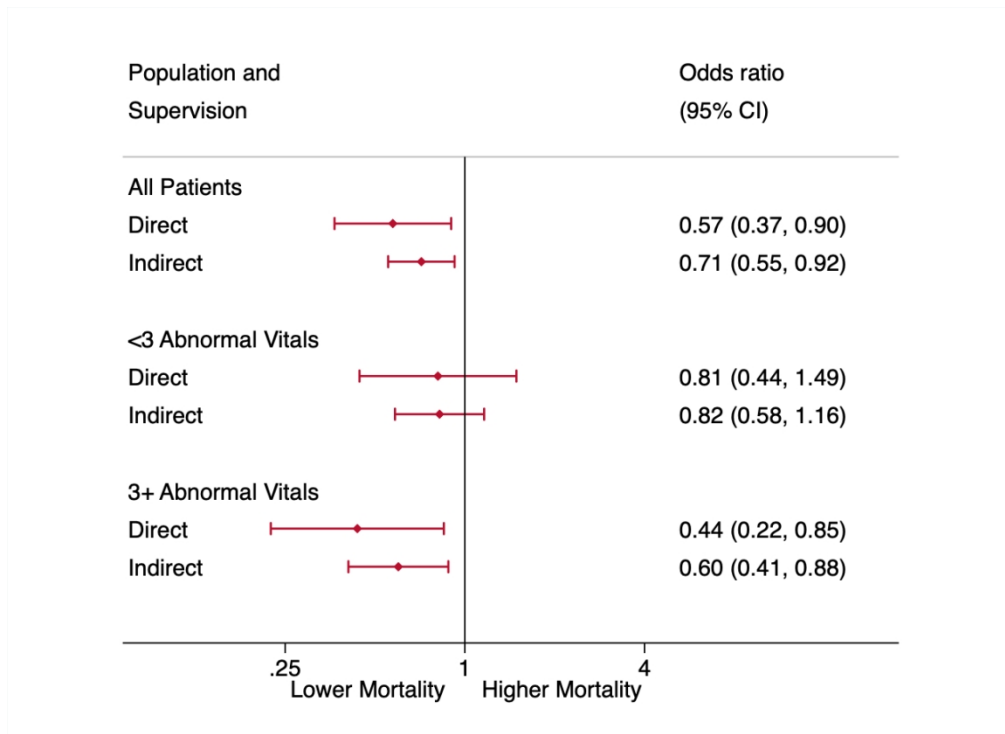

447x325mm (72 x 72 DPI)

APPENDIX 1: Odds Ratios for Mortality comparing Direct Supervision and Indirect Supervision to Independent Care (Complete Case Analysis)

|                          |              | Complete Case Analysis (n=26,869) |        |        |         |
|--------------------------|--------------|-----------------------------------|--------|--------|---------|
|                          |              | OR                                | 95% CI |        | p-Value |
| <b>Age Group</b>         |              |                                   |        |        |         |
|                          | Under 5      | 0.60                              | 0.33   | - 1.10 | 0.1     |
|                          | 5-12 y.o.    | 0.52                              | 0.37   | - 0.72 | <0.001  |
|                          | 18-64 y.o.   | REF                               |        |        |         |
|                          | >=65 y.o.    | 1.59                              | 1.31   | - 1.91 | <0.001  |
| <b>HIV</b>               |              |                                   |        |        |         |
|                          | Negative     | REF                               |        |        |         |
|                          | Positive     | 1.75                              | 1.40   | - 2.19 | <0.001  |
| <b>Malaria</b>           |              |                                   |        |        |         |
|                          | Negative     | REF                               |        |        |         |
|                          | Positive     | 1.08                              | 0.85   | - 1.36 | 0.546   |
| <b>Gender</b>            |              |                                   |        |        |         |
|                          | M            | REF                               |        |        |         |
|                          | F            | 0.56                              | 0.47   | - 0.66 | <0.001  |
| <b>Oxygen Saturation</b> |              |                                   |        |        |         |
|                          | Normal       | REF                               |        |        |         |
|                          | Hypoxic      | 3.11                              | 2.62   | - 3.69 | <0.001  |
| <b>Respiratory Rate</b>  |              |                                   |        |        |         |
|                          | Normal       | REF                               |        |        |         |
|                          | Tachypnea    | 1.92                              | 1.61   | - 2.30 | <0.001  |
| <b>Heart Rate</b>        |              |                                   |        |        |         |
|                          | Normal       | REF                               |        |        |         |
|                          | Tachycardic  | 1.30                              | 1.10   | - 1.54 | 0.002   |
| <b>Blood Pressure</b>    |              |                                   |        |        |         |
|                          | Normotensive | REF                               |        |        |         |
|                          | Hypotensive  | 1.89                              | 1.58   | 2.25   | <0.001  |

|                     |             |      |      |   |        |
|---------------------|-------------|------|------|---|--------|
| Temperature         |             |      |      |   |        |
|                     | Normal      | REF  |      |   |        |
|                     | Hypothermic | 1.96 | 1.65 | - | 2.33   |
|                     | Febrile     | 0.82 | 0.64 | - | 1.05   |
|                     |             |      |      |   | <0.001 |
|                     |             |      |      |   | 0.119  |
| Year                |             |      |      |   |        |
|                     |             | 0.95 | 0.90 | - | 1.01   |
|                     |             |      |      |   | 0.101  |
| Clinical Impression |             |      |      |   |        |
|                     | "Not Sick"  | REF  |      |   |        |
|                     | "Sick"      | 4.20 | 3.31 | - | 5.32   |
|                     | "Toxic"     | 23.2 | 17.1 | - | 31.5   |
|                     |             |      |      |   | <0.001 |
|                     |             |      |      |   | <0.001 |
| Supervision         |             |      |      |   |        |
|                     | Independent | REF  |      |   |        |
|                     | Direct      | 0.79 | 0.45 | - | 1.40   |
|                     | Indirect    | 0.77 | 0.56 | - | 1.05   |
|                     |             |      |      |   | 0.42   |
|                     |             |      |      |   | 0.097  |

**Appendix 2: Odds Ratios for Mortality comparing Direct Supervision and Indirect Supervision to Independent Care**

|                           | OR [95% CI]                               |
|---------------------------|-------------------------------------------|
| <b>3+ Abnormal Vitals</b> |                                           |
| Direct Supervision        | <b>0.61</b> [ <b>0.43</b> - <b>0.85</b> ] |
| Indirect Supervision      | 0.88 [ 0.74 - 1.04 ]                      |
| <b>2 Abnormal Vitals</b>  |                                           |
| Direct Supervision        | 1.63 [ 0.99 - 2.67 ]                      |
| Indirect Supervision      | 1.33 [ 1.02 - 1.73 ]                      |
| <b>1 Abnormal Vital</b>   |                                           |
| Direct Supervision        | 1.35 [ 0.61 - 2.98 ]                      |
| Indirect Supervision      | <b>1.44</b> [ <b>1.04</b> - <b>2.00</b> ] |
| <b>0 Abnormal Vitals</b>  |                                           |
| Direct Supervision        | 2.73 [ 0.80 - 9.26 ]                      |
| Indirect Supervision      | 1.17 [ 0.66 - 2.10 ]                      |

**Bold** indicates statistically significant

**The RECORD statement – checklist of items, extended from the STROBE statement, that should be reported in observational studies using routinely collected health data.**

|                           | Item No. | STROBE items                                                                                                                                                                               | Location in manuscript where items are reported | RECORD items                                                                                                                                                                                                                                                                                                                                                                                                                                | Location in manuscript where items are reported |
|---------------------------|----------|--------------------------------------------------------------------------------------------------------------------------------------------------------------------------------------------|-------------------------------------------------|---------------------------------------------------------------------------------------------------------------------------------------------------------------------------------------------------------------------------------------------------------------------------------------------------------------------------------------------------------------------------------------------------------------------------------------------|-------------------------------------------------|
| <b>Title and abstract</b> |          |                                                                                                                                                                                            |                                                 |                                                                                                                                                                                                                                                                                                                                                                                                                                             |                                                 |
|                           | 1        | (a) Indicate the study's design with a commonly used term in the title or the abstract (b) Provide in the abstract an informative and balanced summary of what was done and what was found |                                                 | RECORD 1.1: The type of data used should be specified in the title or abstract. When possible, the name of the databases used should be included.<br><br>RECORD 1.2: If applicable, the geographic region and timeframe within which the study took place should be reported in the title or abstract.<br><br>RECORD 1.3: If linkage between databases was conducted for the study, this should be clearly stated in the title or abstract. | 1                                               |
| <b>Introduction</b>       |          |                                                                                                                                                                                            |                                                 |                                                                                                                                                                                                                                                                                                                                                                                                                                             |                                                 |
| Background rationale      | 2        | Explain the scientific background and rationale for the investigation being reported                                                                                                       |                                                 |                                                                                                                                                                                                                                                                                                                                                                                                                                             | 3                                               |
| Objectives                | 3        | State specific objectives, including any prespecified hypotheses                                                                                                                           |                                                 |                                                                                                                                                                                                                                                                                                                                                                                                                                             | 5                                               |
| <b>Methods</b>            |          |                                                                                                                                                                                            |                                                 |                                                                                                                                                                                                                                                                                                                                                                                                                                             |                                                 |
| Study Design              | 4        | Present key elements of study design early in the paper                                                                                                                                    |                                                 |                                                                                                                                                                                                                                                                                                                                                                                                                                             | 8                                               |
| Setting                   | 5        | Describe the setting, locations, and relevant dates, including periods of recruitment, exposure, follow-up, and data collection                                                            |                                                 |                                                                                                                                                                                                                                                                                                                                                                                                                                             | 6                                               |

|                                                                                                                                                                                                            |          |                                                                                                                                                                                                                                                                                                                                                                                                                                                                                                                                                                                                                                                                                                                        |  |                                                                                                                                                                                                                                                                                                                                                                                                                                                                                                                                                                                                                                                                                                      |          |
|------------------------------------------------------------------------------------------------------------------------------------------------------------------------------------------------------------|----------|------------------------------------------------------------------------------------------------------------------------------------------------------------------------------------------------------------------------------------------------------------------------------------------------------------------------------------------------------------------------------------------------------------------------------------------------------------------------------------------------------------------------------------------------------------------------------------------------------------------------------------------------------------------------------------------------------------------------|--|------------------------------------------------------------------------------------------------------------------------------------------------------------------------------------------------------------------------------------------------------------------------------------------------------------------------------------------------------------------------------------------------------------------------------------------------------------------------------------------------------------------------------------------------------------------------------------------------------------------------------------------------------------------------------------------------------|----------|
| <p>1<br/>2<br/>3<br/>4<br/>5<br/>6<br/>7<br/>8<br/>9<br/>10<br/>11<br/>12<br/>13<br/>14<br/>15<br/>16<br/>17<br/>18<br/>19<br/>20<br/>21<br/>22<br/>23<br/>24<br/>25<br/>26<br/>27</p> <p>Participants</p> | <p>6</p> | <p>(a) <i>Cohort study</i> - Give the eligibility criteria, and the sources and methods of selection of participants. Describe methods of follow-up<br/> <i>Case-control study</i> - Give the eligibility criteria, and the sources and methods of case ascertainment and control selection. Give the rationale for the choice of cases and controls<br/> <i>Cross-sectional study</i> - Give the eligibility criteria, and the sources and methods of selection of participants</p> <p>(b) <i>Cohort study</i> - For matched studies, give matching criteria and number of exposed and unexposed<br/> <i>Case-control study</i> - For matched studies, give matching criteria and the number of controls per case</p> |  | <p>RECORD 6.1: The methods of study population selection (such as codes or algorithms used to identify subjects) should be listed in detail. If this is not possible, an explanation should be provided.</p> <p>RECORD 6.2: Any validation studies of the codes or algorithms used to select the population should be referenced. If validation was conducted for this study and not published elsewhere, detailed methods and results should be provided.</p> <p>RECORD 6.3: If the study involved linkage of databases, consider use of a flow diagram or other graphical display to demonstrate the data linkage process, including the number of individuals with linked data at each stage.</p> | <p>7</p> |
| <p>28<br/>29<br/>30<br/>31<br/>32<br/>33<br/>34</p> <p>Variables</p>                                                                                                                                       | <p>7</p> | <p>Clearly define all outcomes, exposures, predictors, potential confounders, and effect modifiers. Give diagnostic criteria, if applicable.</p>                                                                                                                                                                                                                                                                                                                                                                                                                                                                                                                                                                       |  | <p>RECORD 7.1: A complete list of codes and algorithms used to classify exposures, outcomes, confounders, and effect modifiers should be provided. If these cannot be reported, an explanation should be provided.</p>                                                                                                                                                                                                                                                                                                                                                                                                                                                                               | <p>7</p> |
| <p>35<br/>36<br/>37<br/>38<br/>39<br/>40<br/>41<br/>42</p> <p>Data sources/<br/>measurement</p>                                                                                                            | <p>8</p> | <p>For each variable of interest, give sources of data and details of methods of assessment (measurement). Describe comparability of assessment methods if there is more than one group</p>                                                                                                                                                                                                                                                                                                                                                                                                                                                                                                                            |  |                                                                                                                                                                                                                                                                                                                                                                                                                                                                                                                                                                                                                                                                                                      | <p>7</p> |

|                                                                                                                                                    |                                  |    |                                                                                                                                                                                                                                                                                                                                                                                                                                                                                                                                                                      |                                                                                                                                                       |   |
|----------------------------------------------------------------------------------------------------------------------------------------------------|----------------------------------|----|----------------------------------------------------------------------------------------------------------------------------------------------------------------------------------------------------------------------------------------------------------------------------------------------------------------------------------------------------------------------------------------------------------------------------------------------------------------------------------------------------------------------------------------------------------------------|-------------------------------------------------------------------------------------------------------------------------------------------------------|---|
| 1<br>2<br>3<br>4                                                                                                                                   | Bias                             | 9  | Describe any efforts to address potential sources of bias                                                                                                                                                                                                                                                                                                                                                                                                                                                                                                            |                                                                                                                                                       | 7 |
| 5<br>6<br>7<br>8<br>9                                                                                                                              | Study size                       | 10 | Explain how the study size was arrived at                                                                                                                                                                                                                                                                                                                                                                                                                                                                                                                            |                                                                                                                                                       | 7 |
| 10<br>11<br>12<br>13<br>14<br>15<br>16<br>17<br>18<br>19<br>20<br>21<br>22<br>23<br>24<br>25<br>26<br>27<br>28<br>29<br>30<br>31<br>32<br>33<br>34 | Quantitative variables           | 11 | Explain how quantitative variables were handled in the analyses. If applicable, describe which groupings were chosen, and why                                                                                                                                                                                                                                                                                                                                                                                                                                        |                                                                                                                                                       | 8 |
| 35<br>36<br>37<br>38<br>39<br>40<br>41<br>42<br>43<br>44<br>45<br>46<br>47                                                                         | Statistical methods              | 12 | (a) Describe all statistical methods, including those used to control for confounding<br>(b) Describe any methods used to examine subgroups and interactions<br>(c) Explain how missing data were addressed<br>(d) <i>Cohort study</i> - If applicable, explain how loss to follow-up was addressed<br><i>Case-control study</i> - If applicable, explain how matching of cases and controls was addressed<br><i>Cross-sectional study</i> - If applicable, describe analytical methods taking account of sampling strategy<br>(e) Describe any sensitivity analyses |                                                                                                                                                       | 8 |
|                                                                                                                                                    | Data access and cleaning methods |    | ..                                                                                                                                                                                                                                                                                                                                                                                                                                                                                                                                                                   | RECORD 12.1: Authors should describe the extent to which the investigators had access to the database population used to create the study population. | 9 |



|                  |    |                                                                                                                                                                                                                                                                                                                                                 |  |                                                                                                                                                                                                                                                                                                                    |     |
|------------------|----|-------------------------------------------------------------------------------------------------------------------------------------------------------------------------------------------------------------------------------------------------------------------------------------------------------------------------------------------------|--|--------------------------------------------------------------------------------------------------------------------------------------------------------------------------------------------------------------------------------------------------------------------------------------------------------------------|-----|
|                  |    |                                                                                                                                                                                                                                                                                                                                                 |  | RECORD 12.2: Authors should provide information on the data cleaning methods used in the study.                                                                                                                                                                                                                    |     |
| Linkage          |    | ..                                                                                                                                                                                                                                                                                                                                              |  | RECORD 12.3: State whether the study included person-level, institutional-level, or other data linkage across two or more databases. The methods of linkage and methods of linkage quality evaluation should be provided.                                                                                          | n/a |
| <b>Results</b>   |    |                                                                                                                                                                                                                                                                                                                                                 |  |                                                                                                                                                                                                                                                                                                                    |     |
| Participants     | 13 | (a) Report the numbers of individuals at each stage of the study ( <i>e.g.</i> , numbers potentially eligible, examined for eligibility, confirmed eligible, included in the study, completing follow-up, and analysed)<br>(b) Give reasons for non-participation at each stage.<br>(c) Consider use of a flow diagram                          |  | RECORD 13.1: Describe in detail the selection of the persons included in the study ( <i>i.e.</i> , study population selection) including filtering based on data quality, data availability and linkage. The selection of included persons can be described in the text and/or by means of the study flow diagram. | 9   |
| Descriptive data | 14 | (a) Give characteristics of study participants ( <i>e.g.</i> , demographic, clinical, social) and information on exposures and potential confounders<br>(b) Indicate the number of participants with missing data for each variable of interest<br>(c) <i>Cohort study</i> - summarise follow-up time ( <i>e.g.</i> , average and total amount) |  |                                                                                                                                                                                                                                                                                                                    | 10  |
| Outcome data     | 15 | <i>Cohort study</i> - Report numbers of outcome events or summary measures over time<br><i>Case-control study</i> - Report numbers in each exposure                                                                                                                                                                                             |  |                                                                                                                                                                                                                                                                                                                    | 11  |

|                   |    |                                                                                                                                                                                                                                                                                                                                                                                                                 |  |                                                                                                                                                                                                                                                                                                          |    |
|-------------------|----|-----------------------------------------------------------------------------------------------------------------------------------------------------------------------------------------------------------------------------------------------------------------------------------------------------------------------------------------------------------------------------------------------------------------|--|----------------------------------------------------------------------------------------------------------------------------------------------------------------------------------------------------------------------------------------------------------------------------------------------------------|----|
|                   |    | category, or summary measures of exposure<br><i>Cross-sectional study</i> - Report numbers of outcome events or summary measures                                                                                                                                                                                                                                                                                |  |                                                                                                                                                                                                                                                                                                          |    |
| Main results      | 16 | (a) Give unadjusted estimates and, if applicable, confounder-adjusted estimates and their precision (e.g., 95% confidence interval). Make clear which confounders were adjusted for and why they were included<br>(b) Report category boundaries when continuous variables were categorized<br>(c) If relevant, consider translating estimates of relative risk into absolute risk for a meaningful time period |  |                                                                                                                                                                                                                                                                                                          | 11 |
| Other analyses    | 17 | Report other analyses done— e.g., analyses of subgroups and interactions, and sensitivity analyses                                                                                                                                                                                                                                                                                                              |  |                                                                                                                                                                                                                                                                                                          | 15 |
| <b>Discussion</b> |    |                                                                                                                                                                                                                                                                                                                                                                                                                 |  |                                                                                                                                                                                                                                                                                                          |    |
| Key results       | 18 | Summarise key results with reference to study objectives                                                                                                                                                                                                                                                                                                                                                        |  |                                                                                                                                                                                                                                                                                                          | 15 |
| Limitations       | 19 | Discuss limitations of the study, taking into account sources of potential bias or imprecision. Discuss both direction and magnitude of any potential bias                                                                                                                                                                                                                                                      |  | RECORD 19.1: Discuss the implications of using data that were not created or collected to answer the specific research question(s). Include discussion of misclassification bias, unmeasured confounding, missing data, and changing eligibility over time, as they pertain to the study being reported. | 19 |
| Interpretation    | 20 | Give a cautious overall interpretation of results considering objectives,                                                                                                                                                                                                                                                                                                                                       |  |                                                                                                                                                                                                                                                                                                          | 20 |

|                                                           |    |                                                                                                                                                               |  |                                                                                                                                                          |     |
|-----------------------------------------------------------|----|---------------------------------------------------------------------------------------------------------------------------------------------------------------|--|----------------------------------------------------------------------------------------------------------------------------------------------------------|-----|
|                                                           |    | limitations, multiplicity of analyses, results from similar studies, and other relevant evidence                                                              |  |                                                                                                                                                          |     |
| Generalisability                                          | 21 | Discuss the generalisability (external validity) of the study results                                                                                         |  |                                                                                                                                                          | 19  |
| <b>Other Information</b>                                  |    |                                                                                                                                                               |  |                                                                                                                                                          |     |
| Funding                                                   | 22 | Give the source of funding and the role of the funders for the present study and, if applicable, for the original study on which the present article is based |  |                                                                                                                                                          | n/a |
| Accessibility of protocol, raw data, and programming code |    | ..                                                                                                                                                            |  | RECORD 22.1: Authors should provide information on how to access any supplemental information such as the study protocol, raw data, or programming code. | n/a |

\*Reference: Benchimol EI, Smeeth L, Guttman A, Harron K, Moher D, Petersen I, Sørensen HT, von Elm E, Langan SM, the RECORD Working Committee. The REporting of studies Conducted using Observational Routinely-collected health Data (RECORD) Statement. *PLoS Medicine* 2015; in press.

\*Checklist is protected under Creative Commons Attribution ([CC BY](https://creativecommons.org/licenses/by/4.0/)) license.

# BMJ Open

**Emergency medicine physician supervision and morality among patients receiving care from non-physician clinicians in a task-sharing model of emergency care in rural Uganda: a retrospective analysis of a single-centre training programme**

|                                 |                                                                                                                                                                                                                                                                                                                                                                                                                                                                                                                                                                                                                                                                                                                                                                                               |
|---------------------------------|-----------------------------------------------------------------------------------------------------------------------------------------------------------------------------------------------------------------------------------------------------------------------------------------------------------------------------------------------------------------------------------------------------------------------------------------------------------------------------------------------------------------------------------------------------------------------------------------------------------------------------------------------------------------------------------------------------------------------------------------------------------------------------------------------|
| Journal:                        | <i>BMJ Open</i>                                                                                                                                                                                                                                                                                                                                                                                                                                                                                                                                                                                                                                                                                                                                                                               |
| Manuscript ID                   | bmjopen-2021-059859.R2                                                                                                                                                                                                                                                                                                                                                                                                                                                                                                                                                                                                                                                                                                                                                                        |
| Article Type:                   | Original research                                                                                                                                                                                                                                                                                                                                                                                                                                                                                                                                                                                                                                                                                                                                                                             |
| Date Submitted by the Author:   | 07-Jun-2022                                                                                                                                                                                                                                                                                                                                                                                                                                                                                                                                                                                                                                                                                                                                                                                   |
| Complete List of Authors:       | Rice, Brian; Stanford University, Emergency Medicine<br>Pickering, Ashley; University of Maryland Medical Center, Emergency Medicine<br>Laurence, Colleen; University of Cincinnati College of Medicine<br>Department of Emergency Medicine<br>Kizito, Prisca; Mbarara University of Science and Technology; Mbarara Regional Referral Hospital<br>Leff, Rebecca ; Mayo Clinic College of Medicine and Science<br>Kisingiri, Steven; Global Emergency Care; Liverpool John Moores University<br>Ndyamwijuka, Charles; Global Emergency Care<br>Nakato, Serena; Global Emergency Care; Karoli Lwanga Hospital<br>Adriko, Lema; Karoli Lwanga Hospital<br>Bisanzo, Mark; University of Vermont College of Medicine<br>Investigators, Global Emergency Care Collaborative; Global Emergency Care |
| <b>Primary Subject Heading</b>: | Global health                                                                                                                                                                                                                                                                                                                                                                                                                                                                                                                                                                                                                                                                                                                                                                                 |
| Secondary Subject Heading:      | Emergency medicine, Health policy, Public health                                                                                                                                                                                                                                                                                                                                                                                                                                                                                                                                                                                                                                                                                                                                              |
| Keywords:                       | Health policy < HEALTH SERVICES ADMINISTRATION & MANAGEMENT, ACCIDENT & EMERGENCY MEDICINE, MEDICAL EDUCATION & TRAINING, HEALTH SERVICES ADMINISTRATION & MANAGEMENT, Epidemiology < TROPICAL MEDICINE                                                                                                                                                                                                                                                                                                                                                                                                                                                                                                                                                                                       |
|                                 |                                                                                                                                                                                                                                                                                                                                                                                                                                                                                                                                                                                                                                                                                                                                                                                               |

SCHOLARONE™  
Manuscripts



I, the Submitting Author has the right to grant and does grant on behalf of all authors of the Work (as defined in the below author licence), an exclusive licence and/or a non-exclusive licence for contributions from authors who are: i) UK Crown employees; ii) where BMJ has agreed a CC-BY licence shall apply, and/or iii) in accordance with the terms applicable for US Federal Government officers or employees acting as part of their official duties; on a worldwide, perpetual, irrevocable, royalty-free basis to BMJ Publishing Group Ltd ("BMJ") its licensees and where the relevant Journal is co-owned by BMJ to the co-owners of the Journal, to publish the Work in this journal and any other BMJ products and to exploit all rights, as set out in our [licence](#).

The Submitting Author accepts and understands that any supply made under these terms is made by BMJ to the Submitting Author unless you are acting as an employee on behalf of your employer or a postgraduate student of an affiliated institution which is paying any applicable article publishing charge ("APC") for Open Access articles. Where the Submitting Author wishes to make the Work available on an Open Access basis (and intends to pay the relevant APC), the terms of reuse of such Open Access shall be governed by a Creative Commons licence – details of these licences and which [Creative Commons](#) licence will apply to this Work are set out in our licence referred to above.

Other than as permitted in any relevant BMJ Author's Self Archiving Policies, I confirm this Work has not been accepted for publication elsewhere, is not being considered for publication elsewhere and does not duplicate material already published. I confirm all authors consent to publication of this Work and authorise the granting of this licence.

1  
2  
3  
4 Emergency medicine physician supervision and morality among  
5 patients receiving care from non-physician clinicians in a task-  
6 sharing model of emergency care in rural Uganda: a  
7 retrospective analysis of a single-centre training programme  
8  
9  
10  
11  
12  
13

14 Co-Frist: Brian Rice MDCM, MSc, DTM&H<sup>1,2</sup> and Ashley Pickering MD, MPH<sup>2,3</sup>, Colleen  
15 Laurence MD, MPH<sup>4</sup>, Prisca Mary Kizito MBChB, EA-DTM&H, MMED EM<sup>5,6,7,8</sup>, Rebecca  
16 Leff MD<sup>9</sup>, Steven Jonathan Kisingiri MBA<sup>2,10</sup>, Charles Ndyamwijuka MSM&E<sup>2</sup>, Serena  
17 Nakato<sup>2,11</sup>, Lema Felix Adriko MBChB, MMED OBS/GYN<sup>11</sup>, Mark Bisanzo MD, DTM&H<sup>2,12</sup>,  
18 on behalf of the Global Emergency Care Collaborative Investigators  
19  
20

21 Global Emergency Care Collaborative Investigators: **Mark Bisanzo, Heather Hammerstedt,**  
22 **Stacey Chamberlain and Bradley Dreifuss**  
23

- 24  
25 1. Stanford University  
26 2. Global Emergency Care  
27 3. University of Maryland School of Medicine  
28 4. University of Cincinnati College of Medicine  
29 5. Mbarara University of Science and Technology  
30 6. Mbarara Regional Referral Hospital  
31 7. International Hospital Kampala  
32 8. Emergency Care Society of Uganda  
33 9. Mayo Clinic College of Medicine and Science  
34 10. Liverpool John Moores University  
35 11. Karoli Lwanga Hospital  
36 12. The University of Vermont Larner College of Medicine  
37  
38

39 Corresponding Author:  
40 Ashley Pickering, MD, MPH  
41 University of Maryland Medical Center  
42 Department of Emergency Medicine  
43 110 S. Paca St, Suite 600  
44 Baltimore, MD 21201  
45 [AshleyPickering@gmail.com](mailto:AshleyPickering@gmail.com)  
46  
47  
48

49 **Word Count:** 3646  
50  
51  
52  
53  
54  
55  
56  
57  
58  
59  
60

**Keywords:**

Low- and Middle-Income Countries  
Uganda  
Emergency Care  
Task-Sharing  
Emergency care training  
Emergency Care Patient Mortality  
Quality Assurance  
Nonphysician Clinician  
Nonphysician Clinician Training  
Nonphysician Clinician Supervision  
Nonphysician Clinician Mortality Outcomes

**ABSTRACT**

**Objectives:** To assess the association between emergency medicine physician supervision and three-day mortality for patients receiving care from non-physician clinicians in a task-sharing model of emergency care in rural Uganda.

**Design:** Retrospective cohort analysis with multivariable logistic regression.

**Setting:** Single rural Ugandan emergency unit.

**Participants:** All patients presenting for care from 2009-2019.

**Interventions:** Three cohorts of patients receiving care from non-physician clinicians had three different levels of physician supervision: “Direct Supervision” (2009-2010) emergency medicine physicians directly supervised all care; “Indirect Supervision” (2010-2015) emergency medicine physicians were consulted as needed; “Independent Care” (2015-2019) no emergency medicine physician supervision.

**Primary outcome measure:** Three-day mortality.

**Results:** 38,033 ED visits met inclusion criteria. Overall mortality decreased significantly across supervision cohorts (“Direct” 3.8%, “Indirect” 3.3%, “Independent” 2.6%,  $p<0.001$ ), but so too did the rates of patients who presented with  $\geq 3$  abnormal vitals (“Direct” 32%, “Indirect” 19%, “Independent” 13%,  $p<0.001$ ). After controlling for vital sign abnormalities, “Direct” and “Indirect” supervision were both significantly associated with reduced OR for mortality (“Direct”: 0.57 [0.37-0.90], “Indirect”: 0.71 [0.55 -0.92]) when compared to “Independent Care”. Sensitivity analysis showed that this mortality benefit was significant for the minority of patients (17.2%) with  $\geq 3$  abnormal vitals (“Direct”: 0.44 [0.22-0.85], “Indirect”: 0.60 [0.41 -0.88]), but not for the majority (82.8%) with 2 or fewer abnormal vitals (“Direct”: 0.81 [0.44-1.49], “Indirect”: 0.82 [0.58 -1.16]).

**Conclusions:** Emergency medicine physician supervision of emergency care non-physician clinicians is independently associated with reduced overall mortality. This benefit appears restricted to the highest risk patients based on abnormal vitals. With over 80% of patients having equivalent mortality outcomes with independent non-physician clinician emergency care, a synergistic model providing variable levels of emergency medicine physician supervision or care based on patient acuity could safely address staffing shortages.

**Strengths and limitations of this study**

- Data from the largest and longest-standing emergency care patient database with mortality outcomes, as well as the only database of emergency care outcomes for non-physician clinician care, published to date in Africa.
- The transition from physician-supervised to independent non-physician clinician care generated a unique natural experiment.
- This is a single-site study conducted at a rural, district-level hospital.
- Patient-level physician supervision data is lacking.
- Logistic regression models are only partially able to control for the changing baseline of population health during the study period.

## INTRODUCTION

Global recognition of the need to develop emergency care is growing. [1,2] In low- and middle-income countries (LMIC), physician shortages make the provision of medical care and in particular emergency care problematic, with the greatest challenge centred in Sub-Saharan Africa (SSA). [3–5] Emergency care needs remain largely unmet throughout many LMICs, including Uganda. [5–8] Based on the estimate that 57% of deaths occurring in low-income countries are from conditions treatable with emergency care, approximately 160,000 Ugandans' lives could have been saved by provision of emergency care in 2019. [9,10] Emergency care in Uganda is largely limited by physician shortages, as there are 1.68 physicians per 10,000 people, amongst the lowest rates worldwide. [11]. Uganda has placed a priority on developing emergency care over the next five years, estimating that 454 specialist emergency care physicians will be required by 2025. [12] Emergency care specialty training in Uganda began in 2017 and currently certifies between five and 10 Ugandan emergency medicine specialists per year.[13] This leaves an enormous training gap with between 45 and 90 years of training needed to produce emergency medicine specialists to meet the projected five-year staffing demands.

One solution to address physician shortage that has been widely advocated and implemented in SSA is “task-sharing,” or delegating tasks to cadres of new or existing providers, often non-physician clinicians, who do not have the broad-ranging, expensive and lengthy training of physicians. [14–20] The World Health Organization advocates for non-physician clinicians that are “adequately trained, supported and supervised”. [18,20] Though non-physician clinicians are currently providing surgical specialty, obstetric, and HIV care throughout SSA [21–27], there has been limited application of non-physician clinician cadres to offset emergency care provider shortages. [19,28,29] High-income countries have compensated for regionally inadequate physician numbers and uneven distribution of emergency physicians by adopting physician supervised non-physician clinicians in larger emergency units and in some cases non-physician clinician practice with remote physician supervision in smaller rural hospitals. [30–33] Data and protocols to guide implementation of emergency care non-physician clinician training and practice in LMICs, where emergency medicine is largely newly developing, and emergency medicine physicians are typically not available, is highly limited.



1  
2  
3  
4  
5  
6  
7  
8  
9  
10  
11  
12  
13  
14  
15  
16  
17  
18  
19  
20  
21  
22  
23  
24  
25  
26  
27  
28  
29  
30  
31  
32  
33  
34  
35  
36  
37  
38  
39  
40  
41  
42  
43  
44  
45  
46  
47  
48  
49  
50  
51  
52  
53  
54  
55  
56  
57  
58  
59  
60

Few studies exist addressing training of non-physician clinicians for roles in the African acute care settings outside of trainings focused on specific obstetric, surgical or anesthesia procedures [34–37], while others find that emergency and acute care training is lacking in non-physician clinician education in many SSA countries including Uganda. [34,38] There are documentation a few short-courses designed to teach non-physician clinicians emergency care skills in SSA. [39–42] While our research group has published on an emergency care non-physician clinician training program and its associated outcomes, we are not aware of any additional studies documenting a comprehensive emergency care non-physician clinicians training program in a LMIC. [29,43–48] Consistent with this limited evidence base, no standards exist describing if, when or how to transition to reduced supervision or independent non-physician clinician care following initial training. This represents a major limitation in the ability to implement non-physician clinician training, supervision and uptake into health systems in a safe, effective and evidence-based manner.

While health systems are evolving in Uganda over the last decade so too is the health of the general population. Uganda's national crude death rates decreased by 63% across all age groups (10.2/1000 in 2009 to 6.4/1000 persons in 2019) during the study period. [49] Concurrently, life expectancy increased by 6.8 years and rates of malaria and HIV infection decreased. [49] Any longitudinal evaluation of mortality occurring during this time period therefore needs to take into account this changing baseline.

Emergency care has been delivered by non-physician clinicians in Uganda since 2009 in a training program that has transitioned from directly supervised to independent non-physician clinician care. The objective of this study was to test the hypothesis that increasing levels of emergency medicine physician supervision for three cohorts of non-physician clinicians were independently associated with reduced three-day patient mortality. Logistic regression modelling was used to control for the changing baseline health of the Ugandan population. Sensitivity analysis was performed to account for missing data and to attempt to define which populations of patients had mortality outcomes impacted by physician supervision.

## METHODS

### Study setting

All data comes from the emergency unit at Karoli Lwanga Hospital, a rural district hospital located in the town of Nyakibale in the Rukungiri District of southwest Uganda. The hospital has a six-bed emergency unit that opened in 2008 and treats 300 to 700 patients per month arriving between 8:00 am and midnight every day of the year. Since 2009, the emergency unit has been staffed by non-physician clinicians who received training from emergency medicine physicians working with Global Emergency Care. The non-physician clinicians are nurses who have completed a two-year advanced training course in emergency care described in detail elsewhere by Hammerstedt et al [29]. While the course is currently administered in conjunction with Mbarara University of Science and Technology, the non-physician clinicians in this cohort study were trained as part of the pilot program that began through a collaboration between GEC and Karoli Lwanga Hospital. Global Emergency Care (GEC), a US-based 501(c) [3] non-governmental organization, has run a two-year emergency care specialty non-physician clinician training program since 2009, and currently does so in collaboration with Mbarara University of Science and Technology (MUST).

Supervision of the non-physician clinicians changed over time generating three cohorts: “Direct Supervision”, “Indirect Supervision” and “Independent Care”. “Direct Supervision”

1  
2  
3 occurred from November 2009 - April 2010 when a single US-trained emergency medicine  
4 physician practicing with a Ugandan license was on site every day and directly supervised non-  
5 physician clinician care and supplemented with clinical care in a model similar to US residency  
6 training. “Indirect Supervision” occurred from July 2010 - November 2015. During this period a  
7 volunteer US-trained emergency medicine physician was on site for approximately 85% of the  
8 weeks; however, they were present in a teaching role only and provided no direct patient care.  
9 They were available for consultation on an ad hoc basis and consultation was based on non-  
10 physician clinician discretion. “Independent Care” occurred from December 2015 - December  
11 2019, and non-physician clinicians provided clinical care without any onsite emergency  
12 medicine physician. During the entire study period, no Ugandan physicians were assigned to the  
13 emergency unit. Hospital physicians were available in a similar manner throughout the study  
14 period for consultation for patients who required surgery, did not respond to initial treatments, or  
15 in whom there was considerable diagnostic uncertainty. Throughout the study period, non-  
16 physician clinicians admitted patients to the same hospital medical and surgical wards, which  
17 were staffed by Ugandan physicians with standard levels of training and no connection to GEC.  
18 Resource availability was constant over the study period and with resource utilization by  
19 clinicians in this emergency unit described in detail elsewhere. [43]  
20  
21  
22  
23  
24

### 25 **Patient and public involvement**

26 The non-physician clinician training program was originally developed in response to several  
27 years of clinical emergency medicine experience and ongoing healthcare staffing shortages in  
28 Uganda. The positive response of patients, staff and administrators at Karoli Lwanga Hospital to  
29 the training program and their interest in improving patient care led to ongoing research and  
30 program evaluation. Patients and the public were not involved in the design of the study;  
31 however, outcome measures are explicitly patient-oriented. Results have been and will continue  
32 to be disseminated through open access publications to allow local clinicians, administrators,  
33 policymakers and researchers to benefit.  
34  
35

### 36 **Data collection**

37 GEC maintained a group of trained research associates who prospectively collected quality  
38 assurance data on all Karoli Lwanga Hospital emergency unit patient visits. Collected data  
39 included demographics, vital signs, laboratory and radiology testing, disposition, as well as  
40 three-day follow-up vital status (mortality) for all admitted and discharged patients. On the third  
41 day following initial evaluation in the emergency unit, patients admitted to the hospital were  
42 visited in person, and patients discharged from the emergency unit or ward were contacted via  
43 phone. This follow-up protocol included seven consecutive days of calling all patients on the  
44 phone (if they had a phone) before considering them lost to follow-up and is described in detail  
45 elsewhere. [29] Ethics approval for the quality assurance database and waiver of consent was  
46 obtained through the Institutional Review Board at Mbarara University of Science and  
47 Technology (No. 11/08-12). Trained research assistants entered data using Microsoft Excel from  
48 1 January 2010 – 23 March 2012, and Microsoft Access from 24 March 2012 – 31 December  
49 2019.  
50  
51  
52  
53

### 54 **Data analysis**

55 A cohort study was done using retrospective analysis of prospectively collected data abstracted  
56 from the Karoli Lwanga Hospital emergency unit quality assurance database, including all  
57  
58  
59  
60

1  
2  
3 consecutive patients presenting to the emergency unit from November 2009 until December  
4 2019. All patients missing age, gender, disposition and three-day follow up were excluded from  
5 analysis. Patients who were dead on arrival (lacked vital signs with no resuscitation or  
6 interventions attempted) and patients who were transferred or left against medical advice did not  
7 receive follow-up by protocol and thus were also excluded from analysis. All other patients of all  
8 ages and dispositions were included. Age, gender, vital signs, malaria testing, HIV status, gestalt  
9 assessment of clinical condition, and year of service were recorded for all patients. Data was  
10 abstracted, cleaned, and analysed by a single researcher (BR) using Stata 16.1 (StataCorp,  
11 College Station, TX). Missing data was imputed using multiple imputation by chained equations  
12 in Stata. Ten datasets were imputed and combined, with disposition and age groups used as  
13 auxiliary variables to predict missingness based on the results described below. Because only  
14 two months of data existed for 2009, and no data was collected for three months in 2010 while  
15 the program transitioned from “Direct” to “Indirect”, the years 2009 and 2010 were both coded  
16 as 2010 for the continuous “Year” variable included in that model. Twelve variables were  
17 included for the final model meeting the minimal criterion of approximately ten events per  
18 variable (n=1,169 events overall).[50] All variables with a univariate p-value less than 0.15 were  
19 included in the final model. Area Under Receiver Operating Characteristics Curve (AUROC),  
20 Hosmer-Lemeshow Goodness of Fit, and Brier score were all calculated for logistic regression  
21 models. No a priori power or sample size calculations were performed as all available records  
22 were included in analysis. Continuous variables were tested for significance using one-way  
23 ANOVA and proportions were compared using chi-squared.  
24  
25  
26  
27

## 28 RESULTS

29 Overall, 49,315 patient visits occurred from 2009 - 2019, and 38,033 (77.1%) met criteria for  
30 inclusion for analysis. Inclusion and exclusion criteria are shown in Figure 1.  
31

32 Patient characteristics stratified by cohorts of patients receiving non-physician emergency  
33 care with different levels of emergency medicine physician supervision (as described in Methods  
34 above) are shown in Table 1.  
35  
36  
37  
38  
39  
40  
41  
42  
43  
44  
45  
46  
47  
48  
49  
50  
51  
52  
53  
54  
55  
56  
57  
58  
59  
60

**Table 1: Patient characteristics**

| Characteristic                                 | Direct Supervision Cohort (n=1,875) | Indirect Supervision Cohort (n=21,052) | Independent Care Cohort (n=15,106) | P-value  |
|------------------------------------------------|-------------------------------------|----------------------------------------|------------------------------------|----------|
| <b>Age, mean (SD)</b>                          | 25.9 (23.5)                         | 28.8 (24.1)                            | 32.9 (24.9)                        | < 0.001* |
| <b>Age group</b>                               |                                     |                                        |                                    |          |
| Under 5 years old, % (n)                       | 26.7% (501)                         | 21.2% (4454)                           | 14.5% (2196)                       | < 0.001  |
| 5-17 years old, % (n)                          | 15.2% (285)                         | 15.8% (3325)                           | 14.7% (2219)                       |          |
| 18-64 years old, % (n)                         | 48.3% (910)                         | 51.7% (10890)                          | 56.5% (8538)                       |          |
| > = 65 years old, % (n)                        | 9.6% (179)                          | 11.3% (2383)                           | 14.3% (2153)                       |          |
| <b>HIV-positive, % (n)</b>                     | 1.9% (35)                           | 5.6% (1182)                            | 6.9% (1045)                        | < 0.001  |
| <b>Malaria parasites on blood smear, % (n)</b> | 24.5% (460)                         | 18.5% (3903)                           | 5.6% (848)                         | < 0.001  |
| <b>Gender - female, % (n)</b>                  | 47.9% (898)                         | 46.2% (9719)                           | 46.6% (7046)                       | 0.29     |
| <b>Complete vital signs</b>                    |                                     |                                        |                                    |          |
| Under 5 years old, % (n)                       | 36.1% (190)                         | 8.5% (401)                             | 8.5% (205)                         | <0.001   |
| 5-12 years old, % (n)                          | 79.6% (86)                          | 57.8% (758)                            | 49.8% (444)                        | <0.001   |
| 13 years and older, % (n)                      | 88.1% (1092)                        | 87.8% (13163)                          | 90.4% (10672)                      | <0.001   |
| <b>Vital sign abnormalities</b>                |                                     |                                        |                                    |          |
| Blood pressure                                 |                                     |                                        |                                    |          |
| Normal, % (n)                                  | 58.2% (1,092)                       | 63.5% (13,368)                         | 72.6% (10,959)                     | <0.001   |
| Hypotensive, % (n)                             | 21.4% (401)                         | 12.0% (2,528)                          | 7.9% (1,194)                       |          |
| Missing, % (n)                                 | 20.4% (382)                         | 24.5% (5,156)                          | 19.6% (2,953)                      |          |
| Respiratory rate                               |                                     |                                        |                                    |          |

|                   |                    |               |                |                |        |
|-------------------|--------------------|---------------|----------------|----------------|--------|
|                   | Normal, % (n)      | 38.9% (730)   | 53.5% (11,266) | 66.2% (10,000) |        |
|                   | Tachypnoea, % (n)  | 52.8% (990)   | 43.3% (9,121)  | 27.7% (4,181)  | <0.001 |
|                   | Missing, % (n)     | 8.27% (155)   | 3.16% (665)    | 6.12% (925)    |        |
| Oxygen saturation |                    |               |                |                |        |
|                   | Normal, % (n)      | 83.7% (1,569) | 80.6% (16,965) | 84.2% (12,722) |        |
|                   | Hypoxic, % (n)     | 13.2% (248)   | 12.0% (2,533)  | 12.7% (1,915)  | <0.001 |
|                   | Missing, % (n)     | 3.1% (58)     | 7.4% (1,554)   | 3.1% (469)     |        |
| Heart rate        |                    |               |                |                |        |
|                   | Normal, % (n)      | 48.9% (971)   | 62.5% (13,161) | 64.2% (9,703)  |        |
|                   | Tachycardic, % (n) | 49.0% (918)   | 36.6% (7,695)  | 33.8% (5,112)  | <0.001 |
|                   | Missing, % (n)     | 2.1% (40)     | 0.9% (196)     | 1.93% (291)    |        |
| Temperature       |                    |               |                |                |        |
|                   | Normal, % (n)      | 38.4% (719)   | 55.3% (11,646) | 54.6% (8,250)  |        |
|                   | Hypothermic, % (n) | 35.7% (670)   | 27.5% (5,779)  | 29.4% (4,444)  | <0.001 |
|                   | Febrile, % (n)     | 22.4% (420)   | 15.7% (3,304)  | 13.6% (2,049)  |        |
|                   | Missing, % (n)     | 3.5% (66)     | 1.5% (323)     | 2.4% (363)     |        |

\*ANOVA used for significance test; all others use chi-squared.

1  
2  
3  
4  
5  
6 There were significant differences in every characteristic across the cohorts except for  
7 gender. As the study progressed there were fewer paediatric patients, more adult and elderly  
8 patients, fewer patients with malaria, more patients with HIV, and more patients with abnormal  
9 vitals. Missingness was relatively low for all vital signs (0.9% - 8.3%) except blood pressure  
10 which had a much higher rate of missingness (19.6% - 24.5%). That missingness was almost  
11 entirely restricted to the paediatric population (0-5 Years Old: 88.6% [n=6,803] missing blood  
12 pressure, 6-12 Years Old: 39.9% (n=922] missing blood pressure, 13 Years and Older: 2.7%  
13 [n=766] missing blood pressure).

14  
15 The three-day mortality for the program overall (2009-2019) was 3.1% (n=1,169 deaths),  
16 and mortality decreased significantly as the program transitioned from “Direct Supervision” to  
17 “Indirect Supervision” to “Independent Care” (3.8% [n=72], 3.3% [n=698], 2.6% [n=399]  
18 respectively,  $p<0.001$ ). Simultaneously, across those time periods patients presented with  
19 significantly fewer abnormal vital signs (Figure 2). Over the entire program, mortality increased  
20 monotonically with each additional abnormal vital sign (Zero Abnormal = 0.7% [n=66], One  
21 Abnormal=1.7% [n=222], Two Abnormal=3.4% [n=321], Three or more=8.6% [n=561],  
22  $p<0.001$ ).

23  
24 Given this changing baseline in patient mortality and prevalence of vital sign  
25 abnormalities, a logistic regression model was developed to determine whether “Direct  
26 Supervision” and/or “Indirect Supervision” was independently associated with increased or  
27 decreased mortality as compared to “Independent Care”.

28  
29 The development of this model incorporated the finding that there was a strong  
30 association with missing vital signs and mortality with a monotonic increase in mortality for each  
31 missing vital sign (Zero Missing: 2.7% [n=746], One Missing: 3.3% [n=319], Two Missing:  
32 7.0% [n=66], Three or more Missing: 7.5% [n=38],  $p<0.001$ ). The highest mortality population  
33 (“Expired in ED” with 100% mortality) had over half the patients (55.4%, n=103) missing one or  
34 more vitals. Therefore, when we attempted complete case analysis for logistic regression, only  
35 70.7% of patients (n=26,869) were included in the model (including only 9.7% of children under  
36 five years old) and only 63.4% (n=741) of deaths were included. Therefore, complete case  
37 analysis was rejected in favour of multiple imputation (complete case analysis results are  
38 available as Appendix 1 and Appendix 2).

39  
40 Using multiple imputation by chained equations over ten datasets (as described in  
41 Methods), we were able to produce a logistic regression model that included all 38,033 patients  
42 (Table 2).  
43

#### 44 **Table 2: Logistic regression model of mortality comparing supervision cohorts**

45  
46  
47  
48  
49  
50  
51  
52  
53  
54  
55  
56  
57  
58  
59

|                          |                   | Multiple Imputation (n=38,033) |        |        |         |
|--------------------------|-------------------|--------------------------------|--------|--------|---------|
|                          |                   | OR                             | 95% CI |        | p-Value |
| <b>Age group</b>         |                   |                                |        |        |         |
|                          | Under 5 years old | 1.29                           | 0.77   | - 1.14 | 0.008   |
|                          | 5-12 years old    | 0.49                           | 0.55   | - 0.90 | <0.001  |
|                          | 18-64 years old   | REF                            |        |        |         |
|                          | >=65 years old    | 1.63                           | 1.37   | - 1.93 | <0.001  |
| <b>HIV</b>               |                   |                                |        |        |         |
|                          | Negative          | REF                            |        |        |         |
|                          | Positive          | 1.84                           | 1.51   | - 2.25 | <0.001  |
| <b>Malaria</b>           |                   |                                |        |        |         |
|                          | Negative          | REF                            |        |        |         |
|                          | Positive          | 0.93                           | 0.78   | - 1.12 | 0.708   |
| <b>Gender</b>            |                   |                                |        |        |         |
|                          | Male              | REF                            |        |        |         |
|                          | Female            | 0.71                           | 0.62   | - 0.80 | <0.001  |
| <b>Oxygen saturation</b> |                   |                                |        |        |         |
|                          | Normal            | REF                            |        |        |         |
|                          | Hypoxic           | 2.95                           | 2.55   | - 3.41 | <0.001  |
| <b>Respiratory rate</b>  |                   |                                |        |        |         |
|                          | Normal            | REF                            |        |        |         |

|                     |              |      |      |   |      |        |
|---------------------|--------------|------|------|---|------|--------|
|                     | Tachypnoea   | 1.82 | 1.58 | - | 2.11 | <0.001 |
| Heart rate          |              |      |      |   |      |        |
|                     | Normal       | REF  |      |   |      |        |
|                     | Tachycardic  | 1.18 | 1.03 | - | 1.36 | 0.02   |
| Blood pressure      |              |      |      |   |      |        |
|                     | Normotensive | REF  |      |   |      |        |
|                     | Hypotensive  | 1.65 | 1.39 |   | 1.96 | 0.027  |
| Temperature         |              |      |      |   |      |        |
|                     | Normal       |      |      |   |      |        |
|                     | Hypothermic  | 2.09 | 1.81 | - | 2.42 | <0.001 |
|                     | Febrile      | 0.80 | 0.66 | - | 0.98 | 0.034  |
| Year                |              |      |      |   |      |        |
|                     |              | 0.90 | 0.86 | - | 0.95 | <0.001 |
| Clinical impression |              |      |      |   |      |        |
|                     | "Not Sick"   |      |      |   |      |        |
|                     | "Sick"       | 4.81 | 3.91 | - | 5.90 | <0.001 |
|                     | "Toxic"      | 35.6 | 27.8 | - | 45.5 | <0.001 |
| Supervision         |              |      |      |   |      |        |
|                     | Independent  | REF  |      |   |      |        |
|                     | Direct       | 0.57 | 0.37 | - | 0.90 | 0.015  |
|                     | Indirect     | 0.71 | 0.55 | - | 0.92 | 0.01   |



1  
2  
3  
4  
5  
6 This model had excellent discrimination (AUROC: 0.87 [0.85 – 0.88]), goodness of fit  
7 (Hosmer-Lemeshow: 0.991) and accuracy (Brier score: 0.0256). This model found that both  
8 “Direct” and “Indirect” supervision were significantly independently associated with reduced OR  
9 for mortality (“Direct”: 0.57 [0.37-0.90], “Indirect”: 0.71 [0.55 -0.92]) when compared to  
10 “Independent Care”. As a sensitivity analysis, patients with and without three or more abnormal  
11 vital signs were analysed separately (Figure 3).

12  
13 For the minority of patients with three or more abnormal vital signs (17.2%, n=6,451),  
14 both “Direct” and “Indirect” supervision were significantly independently associated with  
15 reduced OR for mortality (“Direct”: 0.44 [0.22-0.85], “Indirect”: 0.60 [0.41 -0.88]). However,  
16 for the majority of patients who had two or fewer abnormal vital signs (82.8%, n=31,492) there  
17 was no significant difference in OR for mortality (“Direct”: 0.81 [0.44-1.49], “Indirect”: 0.82  
18 [0.58 -1.16]).  
19

## 20 DISCUSSION

21 This study of a non-physician clinician emergency care training program in rural Uganda  
22 demonstrates that direct and indirect supervision by emergency medicine physicians reduced  
23 overall mortality as compared to independent non-physician clinician emergency care.  
24 Sensitivity analysis showed this benefit was restricted to the most severely ill subset of patients –  
25 as defined by abnormal vitals – with independent non-physician clinician care having similar  
26 outcomes to physician-supervised care for the vast majority of patients. These findings are  
27 consistent with a prior study by our author group showing the mortality benefit for direct  
28 emergency medicine physician supervision was restricted to the most severely ill subset of  
29 children under 5 years of age [46]. We are not aware of any other studies addressing mortality  
30 rates of patients cared for by emergency care specialty trained non-physician clinicians in similar  
31 LMIC settings. This finding has potentially profound implications for policy to maximize  
32 workforce potential in the rapidly developing field of emergency care in Uganda and in similar  
33 settings.  
34  
35

36 One of the fundamental challenges of our analysis was the rapidly changing background  
37 of the health system in Uganda during the study period (2009-2019). Many of the most profound  
38 shifts seen in our study likely reflect the overall changes in Ugandan health care. As shown in  
39 Figure 2, overall mortality significantly ( $p<0.001$ ) decreased by almost 70% during the study  
40 period. While impressive, this finding is consistent with the 63% reduction in national crude  
41 death rate during the study period [49]. Similarly, we saw many demographic shifts in our  
42 population over time (Table 1) including fewer emergencies in children under 5, more elderly  
43 patients and reduced rates of malaria. Again, these are consistent with Ugandan national trends  
44 over that time period.[49]  
45

46 Logistic regression models were developed control for confounding variables. As  
47 mentioned in Results, high rates of missing data for the highest mortality patients and children  
48 under five years old made complete-case analysis a poor fit for our data set. Multiple imputation  
49 was eventually selected as the optimal method for handling missing data.[51,52] Single  
50 (deterministic) imputation models were developed but ultimately discarded based on poor  
51 performance. The multiple imputation model had excellent characteristics (discrimination,  
52 goodness of fit, and accuracy) and showed that both “Direct Supervision” and “Indirect  
53 Supervision” reduced program mortality overall as compared to “Independent Care”. This is an  
54  
55  
56  
57  
58  
59  
60

1  
2  
3 expected finding, as no argument exists in this manuscript or elsewhere suggesting complete  
4 equality between physician and non-physician clinician training, practice or outcomes. Rather,  
5 this finding clearly highlights the importance of the scaling-up of the ongoing emergency  
6 medicine physician training efforts in Uganda to reduce mortality in emergencies nationwide.  
7

8 While emergency medicine physician care for all emergency patients is ideal, the current  
9 rate of emergency medicine specialist training, health system funding, and high demand for  
10 emergency medicine specialist physicians at training institutions and in administrative roles,  
11 means that the ideal of emergency medicine specialist clinical care in emergency units  
12 throughout Uganda may be decades away from being realized. Therefore, optimizing the role of  
13 non-physician clinicians can help address the current gap between emergency care patients and  
14 providers.  
15

16 Sensitivity analysis was performed to attempt to identify which subset of patients might  
17 benefit most from physician supervision. With prior studies showing the benefit of direct  
18 physician supervision of non-physicians was limited to severely ill pediatric patients, our  
19 sensitivity analysis involved stratifying by vital signs.[46] We found that minority of patients  
20 with three or more abnormal vital signs (16.7%, n=6,541) had significantly reduced OR of  
21 mortality, and that reduction was enough to create a significant mortality impact for those  
22 supervision cohorts overall. However, when the majority of patients with two or fewer abnormal  
23 vital signs were looked at separately there was no significant reduction in mortality when  
24 comparing either “Direct Supervision” or “Indirect Supervision” to “Independent Care”. We  
25 believe this finding could be used at triage to immediately identify patients most likely to receive  
26 benefit from emergency medicine physician supervision in clinical situations where that resource  
27 is too limited to be provided for all patients.  
28  
29

30 We strongly support the ongoing development of emergency medicine specialty training  
31 for physicians in Uganda to help achieve the ultimate goal of providing emergency medicine  
32 physician clinical care for all patients. However, current emergency care staffing shortages in  
33 Uganda and elsewhere in Sub-Saharan Africa are likely to persist for decades to come.  
34 Augmenting the physician workforce with emergency care specialty-trained non-physician  
35 clinicians — who can be trained more rapidly, at a lower cost, and are more likely to work in  
36 rural areas — is a clear path forward to addressing the immediate emergency care needs faced by  
37 millions of Ugandans today.[3,20,38,53] Our analysis shows that a synergy between these groups  
38 is possible: non-physician clinicians can safely deliver independent care for the majority of less  
39 severely ill patients without causing excess mortality, while emergency medicine physicians can  
40 provide or supervise non-physician clinician care to reduce mortality for the most severely ill  
41 subset of patients.  
42  
43

#### 44 **Limitations**

45 This is a single-centre, retrospective study of an emergency unit database. Mortality follow-up  
46 was limited to three days. While one week and one month mortality is undoubtedly important,  
47 three-day follow-up was chosen both to minimize loss to follow-up in a setting where most  
48 patients do not have consistent ability to receive phone calls and because follow-up after three  
49 days was thought to be less reflective of outcomes related to acute care provided in the  
50 emergency unit. Inpatient mortality was affected not just by emergency unit care but also by  
51 hospital ward care. However, this care was provided similarly throughout the study, making it  
52 unlikely to bias outcomes in comparisons between cohorts. Multiple imputation is a widely  
53 accepted method for dealing with missing data, but even with auxiliary variables used to improve  
54 the likelihood of meeting the missing at random assumption, any approach to missing data is  
55  
56  
57  
58  
59  
60

imperfect with multiple imputation being no exception. Lastly, there was a high loss to follow-up in discharged patients over the duration of the study (47.7%, n=8,110). Most of this loss to follow was due to lack of phones for the discharged patients (Had no phone: 82.3%, n=6,592; Invalid number: 6.9%, n=553) with only 10.7% (n=856) being loss to follow up for other reasons. However, with a mortality rate of 0.07% (n=6 deaths in 8,906 discharges) in discharged patients with complete follow-up, it is highly unlikely that the 8,110 discharged patients lost to follow-up represent a significant number of fatal cases excluded from our analysis. The 6.3% loss to follow-up rate for admitted and direct to theatre patients was otherwise considered adequate given the challenges of emergency unit data collection in Sub-Saharan Africa.

## CONCLUSIONS

This analysis shows that task-sharing of emergency care specialty-trained non-physician clinicians to address emergency care staffing shortages is both efficient and safe for the vast majority of patient encounters. As Uganda strives to reach the goal of consistent emergency medicine physician coverage of emergency units, operationalizing a hybrid model with emergency medicine physician supervision of otherwise independent non-physician clinician care for the sickest emergency care patients has the potential to save lives. Based on the robust evidence base reported here, our recommendations are as follows:

1. Scale up emergency medicine physician development and training: The highest risk approximately 15% of patients had nearly a 50% reduction in mortality with physician involvement, and direct supervision significantly reduced overall mortality.
2. Increase capacity for emergency care NCP training: emergency care non-physician clinicians provided independent care comparable to care given with emergency medicine physician supervision for approximately 85% of patients over the study period.
3. Create triage protocols for early identification of the highest risk patients: in our analysis patients with three or more abnormal vital signs were most likely to derive benefit from emergency medicine physician clinical care or supervision of non-physician clinician care.
4. Create clear protocols and systems to provide emergency care non-physician clinicians with direct supervision in person or via phone/telehealth consultation by emergency medicine physician for patients at high-risk of mortality.

## Contributors

BR, AP, CL & MB contributed to conception or design of the work; BR, AP, CL, PK, RL, SK, CN, SN, LA & MB contributed to the acquisition, analysis, or interpretation of data for the work and drafting the work or revising it critically for important intellectual content; BR, AP, CL, PK, RL, SK, CN, SN, LA & MB provided final approval prior to publication; BR, AP, CL, PK, RL, SK, CN, SN, LA & MB agree to be accountable for accuracy and integrity of all aspects of the work.

## Funding

This study received no outside funding.

### Competing interests

There are no competing interests for any author.

### Ethics approval

Mbarara University of Science and Technology (MUST) Research Ethics Committee No. 11/08-12

### Data availability statement

Data sharing is not allowed under the study IRB Mbarara University of Science and Technology (MUST) Research Ethics Committee No. 11/08-12.

## References

- 1 World Health Assembly 72. Emergency care systems for universal health coverage: ensuring timely care for the acutely ill and injured. Geneva: World Health Organization 2019. <https://apps.who.int/iris/handle/10665/329363>
- 2 World Health Assembly 60. Health systems: emergency-care systems. Geneva: World Health Organization 2007. <https://apps.who.int/iris/handle/10665/22596>
- 3 Asamani JA, Akogun OB, Nyoni J, *et al.* Towards a regional strategy for resolving the human resources for health challenges in Africa. *BMJ Global Health* 2019;**4**:e001533. doi:10.1136/bmjgh-2019-001533
- 4 World Health Organization. Working together for health : the world health report 2006 : overview. *Travailler ensemble pour la santé : rapport sur la santé dans le monde 2006 : résumé* Published Online First: 2006.<https://apps.who.int/iris/handle/10665/69256>
- 5 Calvello E, Reynolds T, Hirshon JM, *et al.* Emergency care in sub-Saharan Africa: Results of a consensus conference. *African Journal of Emergency Medicine* 2013;**3**:42–8. doi:10.1016/j.afjem.2013.01.001
- 6 Ningwa A, Muni K, Oporia F, *et al.* The state of emergency medical services and acute health facility care in Uganda: findings from a National Cross-Sectional Survey. *BMC Health Services Research* 2020;**20**:1–10.
- 7 Chang CY, Abujaber S, Reynolds TA, *et al.* Burden of emergency conditions and emergency care usage: new estimates from 40 countries. *Emerg Med J* 2016;**33**:794–800. doi:10.1136/emered-2016-205709
- 8 Obermeyer Z, Abujaber S, Makar M, *et al.* Emergency care in 59 low-and middle-income countries: a systematic review. *Bulletin of the World Health Organization* 2015;**93**:577–86.
- 9 Razzak J, Usmani MF, Bhutta ZA. Global, regional and national burden of emergency medical diseases using specific emergency disease indicators: analysis of the 2015 Global Burden of Disease Study. *BMJ Global Health* 2019;**4**. doi:10.1136/bmjgh-2018-000733
- 10 Uganda | Data. <https://data.worldbank.org/country/UG> (accessed 8 Aug 2021).
- 11 Medical doctors (per 10 000 population). [https://www.who.int/data/gho/data/indicators/indicator-details/GHO/medical-doctors-\(per-10-000-population\)](https://www.who.int/data/gho/data/indicators/indicator-details/GHO/medical-doctors-(per-10-000-population)) (accessed 8 Aug 2021).
- 12 THIRD NATIONAL DEVELOPMENT PLAN (NDPIII) 2020/21 – 2024/25. Ugandan National Planning Authority [http://www.npa.go.ug/wp-content/uploads/2020/08/NDPIII-Finale\\_Compressed.pdf](http://www.npa.go.ug/wp-content/uploads/2020/08/NDPIII-Finale_Compressed.pdf) (accessed 10 Sep 2021).
- 13 Kizito P. The total number of Ugandan MMedS enrolled in training. 2021.

- 14 Eyal N, Cancedda C, Kyamanywa P, *et al.* Non-physician Clinicians in Sub-Saharan Africa and the Evolving Role of Physicians. *Int J Health Policy Manag* 2015;**5**:149–53. doi:10.15171/ijhpm.2015.215
- 15 Fulton BD, Scheffler RM, Sparkes SP, *et al.* Health workforce skill mix and task shifting in low income countries: a review of recent evidence. *Human resources for health* 2011;**9**:1.
- 16 Lehmann U, Van Damme W, Barten F, *et al.* Task shifting: the answer to the human resources crisis in Africa? *Human Resources for Health* 2009;**7**:49. doi:10.1186/1478-4491-7-49
- 17 Mullan F, Frehywot S. Non-physician clinicians in 47 sub-Saharan African countries. *The Lancet* 2007;**370**:2158–63. doi:10.1016/S0140-6736(07)60785-5
- 18 World Health Organization, PEPFAR, UNAIDS. Task shifting : rational redistribution of tasks among health workforce teams : global recommendations and guidelines. Published Online First: 2007. <https://apps.who.int/iris/handle/10665/43821>
- 19 Terry B, Bisanzo M, McNamara M, *et al.* Task shifting: meeting the human resources needs for acute and emergency care in Africa. *African Journal of Emergency Medicine* 2012;**2**:182–7.
- 20 World Health Organization. Regional Office for South-East Asia. Mid-level health workers: a review of the evidence. New Delhi: : World Health Organization. Regional Office for South-East Asia 2018. <https://apps.who.int/iris/handle/10665/259878>
- 21 Bergström S. Training non-physician mid-level providers of care (associate clinicians) to perform caesarean sections in low-income countries. *Best Practice & Research Clinical Obstetrics & Gynaecology* 2015;**29**:1092–101. doi:10.1016/j.bpobgyn.2015.03.016
- 22 Gajewski J, Cheelo M, Bijlmakers L, *et al.* The contribution of non-physician clinicians to the provision of surgery in rural Zambia—a randomised controlled trial. *Human Resources for Health* 2019;**17**:60. doi:10.1186/s12960-019-0398-9
- 23 Wilhelm TJ, Thawe IK, Mwatibu B, *et al.* Efficacy of major general surgery performed by non-physician clinicians at a central hospital in Malawi. *Trop Doct* 2011;**41**:71–5. doi:10.1258/td.2010.100272
- 24 Wilhelm TJ, Dzimbiri K, Sembereka V, *et al.* Task-shifting of orthopaedic surgery to non-physician clinicians in Malawi: effective and safe? *Tropical doctor* 2017;**47**:294–9.
- 25 Gessesew A, Barnabas GA, Prata N, *et al.* Task shifting and sharing in Tigray, Ethiopia, to achieve comprehensive emergency obstetric care. *International Journal of Gynecology & Obstetrics* 2011;**113**:28–31. doi:10.1016/j.ijgo.2010.10.023
- 26 Nyamtema AS, Pemba SK, Mbaruku G, *et al.* Tanzanian lessons in using non-physician clinicians to scale up comprehensive emergency obstetric care in remote and rural areas. *Human Resources for Health* 2011;**9**:28. doi:10.1186/1478-4491-9-28



- 1  
2  
3 27 Beard JH, Oresanya LB, Akoko L, *et al.* Surgical Task-Shifting in a Low-Resource Setting:  
4 Outcomes After Major Surgery Performed by Nonphysician Clinicians in Tanzania. *World J*  
5 *Surg* 2014;**38**:1398–404. doi:10.1007/s00268-013-2446-2  
6  
7 28 Chamberlain S, Stolz U, Dreifuss B, *et al.* Mortality related to acute illness and injury in  
8 rural Uganda: task shifting to improve outcomes. *PloS one* 2015;**10**:e0122559.  
9  
10 29 Hammerstedt H MD, MPH, Maling S MBChB, Kasyaba R MBChB, *et al.* Addressing World  
11 Health Assembly Resolution 60.22: A Pilot Project to Create Access to Acute Care Services  
12 in Uganda. *Annals of Emergency Medicine* 2014;**64**:461–8.  
13 doi:10.1016/j.annemergmed.2014.01.035  
14  
15 30 Guidelines Regarding the Role of Physician Assistants and Nurse Practitioners in the  
16 Emergency Department. [https://www.acep.org/patient-care/policy-statements/guidelines-](https://www.acep.org/patient-care/policy-statements/guidelines-regarding-the-role-of-physician-assistants-and-nurse-practitioners-in-the-emergency-department/)  
17 [regarding-the-role-of-physician-assistants-and-nurse-practitioners-in-the-emergency-](https://www.acep.org/patient-care/policy-statements/guidelines-regarding-the-role-of-physician-assistants-and-nurse-practitioners-in-the-emergency-department/)  
18 [department/](https://www.acep.org/patient-care/policy-statements/guidelines-regarding-the-role-of-physician-assistants-and-nurse-practitioners-in-the-emergency-department/) (accessed 8 Aug 2021).  
19  
20 31 Hooker RS, Klocko DJ, Larkin GL. Physician Assistants in Emergency Medicine: The  
21 Impact of Their Role. *Academic Emergency Medicine* 2011;**18**:72–7. doi:10.1111/j.1553-  
22 2712.2010.00953.x  
23  
24 32 Doan Q, Sabhaney V, Kisson N, *et al.* A systematic review: The role and impact of the  
25 physician assistant in the emergency department. *Emergency Medicine Australasia*  
26 2011;**23**:7–15. doi:10.1111/j.1742-6723.2010.01368.x  
27  
28 33 Yordanov Y, Chouihed T, Riou B, *et al.* Task shifting and emergency nurse practitioners –  
29 are nurses the future of emergency medicine?: the French experience. *European Journal of*  
30 *Emergency Medicine* 2020;**27**:9–10. doi:10.1097/MEJ.0000000000000664  
31  
32 34 Couper I, Ray S, Blaauw D, *et al.* Curriculum and training needs of mid-level health workers  
33 in Africa: a situational review from Kenya, Nigeria, South Africa and Uganda. *BMC Health*  
34 *Services Research* 2018;**18**:553. doi:10.1186/s12913-018-3362-9  
35  
36 35 Freistadt F, Branigan E, Pupp C, *et al.* A framework for revising preservice curriculum for  
37 nonphysician clinicians: The mozambique experience. *Education for Health* 2014;**27**:283.  
38 doi:10.4103/1357-6283.152190  
39  
40 36 Rick TJ, Moshi DD. The Tanzanian assistant medical officer. *Journal of the American*  
41 *Academy of PAs* 2018;**31**:43–7.  
42  
43 37 Yasmin F, Schultz A, Phiri A, *et al.* “I Need to Be the First One With a Different Approach  
44 and to Make a Difference to the People”-Transforming Pediatric Training for Non-physician  
45 Clinicians in Malawi: A Mixed-method Study. 2020.  
46  
47 38 Zhao Y, Hagel C, Tweheyo R, *et al.* Task-sharing to support paediatric and child health  
48 service delivery in low- and middle-income countries: current practice and a scoping review  
49 of emerging opportunities. *Human Resources for Health* 2021;**19**:95. doi:10.1186/s12960-  
50 021-00637-5  
51  
52  
53  
54  
55  
56  
57  
58  
59

- 1  
2  
3 39 Byrne-Davis LMT, Jackson MJ, McCarthy R, *et al.* A pre-post study of behavioural  
4 determinants and practice change in Ugandan clinical officers. *African Journal of Health*  
5 *Professions Education* 2018;**10**:220–7.  
6  
7  
8 40 Fant CD, Schwartz KR, Patel H, *et al.* Developing and Implementing a Pediatric Emergency  
9 Care Curriculum for Providers at District Level Hospitals in Sub-Saharan Africa: A Case  
10 Study in Kenya. *Front Public Health* 2017;**5**:322. doi:10.3389/fpubh.2017.00322  
11  
12 41 James DR, Barling J, Ross O, *et al.* G293 (P) Towards emergency triage assessment and  
13 treatment (ETAT)++: introducing basic paediatric trauma management skills in rural Ghana.  
14 *Archives of Disease in Childhood* 2019;**104**:A120.  
15  
16 42 Niyogi A, Villona B, Rubenstein BL, *et al.* In-service training of physician assistants in acute  
17 care in Ghana: Challenges, successes, and lessons learned. *African Journal of Emergency*  
18 *Medicine* 2015;**5**:114–9. doi:10.1016/j.afjem.2015.01.006  
19  
20 43 Bitter CC, Rice B, Periyayagam U, *et al.* What resources are used in emergency  
21 departments in rural sub-Saharan Africa? A retrospective analysis of patient care in a  
22 district-level hospital in Uganda. *BMJ Open* 2018;**8**:e019024. doi:10.1136/bmjopen-2017-  
23 019024  
24  
25 44 Colella M, Bisanzo M, Farquhar C, *et al.* Implementation and evaluation of an innovative  
26 leadership and teacher training program for non-physician emergency medicine practitioners  
27 in Uganda. *African Journal of Emergency Medicine* 2019;**9**:25–9.  
28 doi:10.1016/j.afjem.2018.12.002  
29  
30 45 Dresser C, Periyayagam U, Dreifuss B, *et al.* Management and Outcomes of Acute  
31 Surgical Patients at a District Hospital in Uganda with Non-physician Emergency Clinicians.  
32 *World Journal of Surgery* 2017;**41**:2193–9. doi:10.1007/s00268-017-4014-7  
33  
34 46 Rice B, Periyayagam U, Chamberlain S, *et al.* Mortality in Children Under Five Receiving  
35 Nonphysician Clinician Emergency Care in Uganda. *Pediatrics* 2016;**137**:e20153201–  
36 e20153201. doi:10.1542/peds.2015-3201  
37  
38 47 Rice B, Leanza J, Mowafi H, *et al.* Defining high-risk emergency chief complaints:  
39 data-driven triage for low-and middle-income countries. *Academic Emergency Medicine*  
40 2020;**27**:1291–301.  
41  
42 48 Rybarczyk MM, Ludmer N, Broccoli MC, *et al.* Emergency Medicine Training Programs in  
43 Low- and Middle-Income Countries: A Systematic Review. *Ann Glob Health*;**86**.  
44 doi:10.5334/aogh.2681  
45  
46 49 Uganda - World Bank Open Data. The World Bank <https://data.worldbank.org/country/UG>  
47 (accessed 4 Sep 2021).  
48  
49 50 Vittinghoff E, McCulloch CE. Relaxing the Rule of Ten Events per Variable in Logistic and  
50 Cox Regression. *American Journal of Epidemiology* 2007;**165**:710–8.  
51 doi:10.1093/aje/kwk052  
52  
53  
54  
55  
56  
57  
58  
59  
60



- 1  
2  
3 51 Mackinnon A. The use and reporting of multiple imputation in medical research—a review.  
4 *Journal of internal medicine* 2010;**268**:586–93.  
5  
6  
7 52 Johnson DR, Young R. Toward Best Practices in Analyzing Datasets with Missing Data:  
8 Comparisons and Recommendations. *Journal of Marriage and Family* 2011;**73**:926–45.  
9 doi:10.1111/j.1741-3737.2011.00861.x  
10  
11 53 Seidman G, Atun R. Does task shifting yield cost savings and improve efficiency for health  
12 systems? A systematic review of evidence from low-income and middle-income countries.  
13 *Human Resources for Health* 2017;**15**:29. doi:10.1186/s12960-017-0200-9  
14  
15  
16  
17

## 18 **FIGURE TITLES**

19  
20 **Figure 1: Patient flow diagram**

21  
22  
23 **Figure 2: Mortality and vital sign abnormalities across supervision cohorts**

24  
25 **Figure 3: Odds ratios for mortality comparing direct supervision and indirect supervision**  
26 **with independent care**  
27  
28  
29  
30  
31  
32  
33  
34  
35  
36  
37  
38  
39  
40  
41  
42  
43  
44  
45  
46  
47  
48  
49  
50  
51  
52  
53  
54  
55  
56  
57  
58  
59  
60

**Excluded**

- 1 **1. Disposition missing:** n = 191 (0.4%)
- 2 **2. Age missing:** n = 275 (0.6%)
- 3 **3. Gender missing:** n = 30 (0.06%)
- 4 **4. Disposition:** n=721 (1.5%)
- 5 including: DOA, n = 33
- 6 AMA, n= 131
- 7 Escaped, n= 65
- 8 Referred, n = 492
- 9 **5. Lost to follow up:** n = 10,065 (20.4%)
- 10 including: Discharged, n= 8,110
- 11 Admitted, n= 1,918
- 12 Theatre, n= 37

**Total visits**  
n = 49,315

**Total visits for analysis**  
n = 38,033

**Direct Supervision**

November 2009 - April 2010

**n = 1,875 (4.93%)**

Admit: 1,425 (76.0%)

Discharge: 421 (22.5%)

Expired in the ED: 15 (0.8%)

Theatre: 14 (0.75%)

**Indirect Supervision**

July 2010 - November 2015

**n = 21,052 (55.35%)**

Admit: 15,578 (74.0%)

Discharge: 5,233 (24.9%)

Expired in the ED: 115 (0.8%)

Theatre: 126 (0.6%)

**Independent Care**

December 2015 - December 2019

**n = 15,106 (39.72%)**

Admit: 11,647 (77.1%)

Discharge: 3,252 (21.5%)

Expired in the ED: 56 (0.4%)

Theatre: 151 (1%)

1  
2  
3  
4  
5  
6  
7  
8  
9  
10  
11  
12  
13  
14  
15  
16  
17  
18  
19  
20  
21  
22  
23  
24  
25  
26  
27  
28  
29  
30  
31  
32  
33  
34  
35  
36  
37  
38  
39  
40  
41  
42  
43  
44  
45  
46  
47  
48  
49  
50  
51  
52  
53  
54  
55  
56  
57  
58  
59  
60

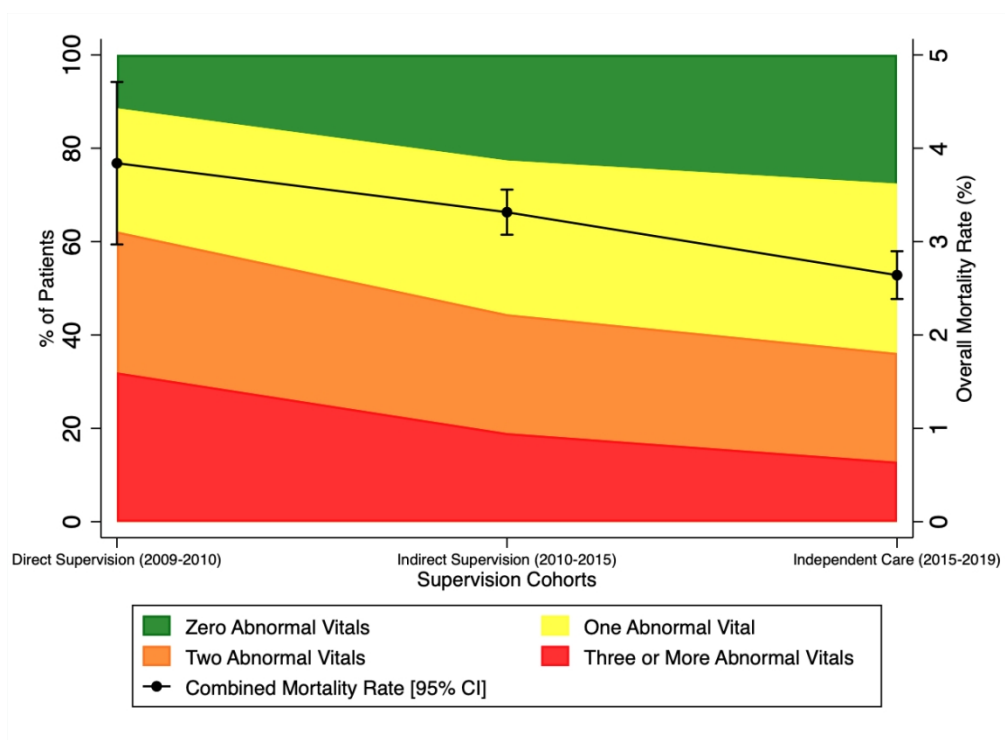

442x322mm (72 x 72 DPI)

1  
2  
3  
4  
5  
6  
7  
8  
9  
10  
11  
12  
13  
14  
15  
16  
17  
18  
19  
20  
21  
22  
23  
24  
25  
26  
27  
28  
29  
30  
31  
32  
33  
34  
35  
36  
37  
38  
39  
40  
41  
42  
43  
44  
45  
46  
47  
48  
49  
50  
51  
52  
53  
54  
55  
56  
57  
58  
59  
60



447x325mm (72 x 72 DPI)

APPENDIX 1: Odds Ratios for Mortality comparing Direct Supervision and Indirect Supervision to Independent Care (Complete Case Analysis)

|                          |              | Complete Case Analysis (n=26,869) |        |        |         |
|--------------------------|--------------|-----------------------------------|--------|--------|---------|
|                          |              | OR                                | 95% CI |        | p-Value |
| <b>Age Group</b>         |              |                                   |        |        |         |
|                          | Under 5      | 0.60                              | 0.33   | - 1.10 | 0.1     |
|                          | 5-12 y.o.    | 0.52                              | 0.37   | - 0.72 | <0.001  |
|                          | 18-64 y.o.   | REF                               |        |        |         |
|                          | >=65 y.o.    | 1.59                              | 1.31   | - 1.91 | <0.001  |
| <b>HIV</b>               |              |                                   |        |        |         |
|                          | Negative     | REF                               |        |        |         |
|                          | Positive     | 1.75                              | 1.40   | - 2.19 | <0.001  |
| <b>Malaria</b>           |              |                                   |        |        |         |
|                          | Negative     | REF                               |        |        |         |
|                          | Positive     | 1.08                              | 0.85   | - 1.36 | 0.546   |
| <b>Gender</b>            |              |                                   |        |        |         |
|                          | M            | REF                               |        |        |         |
|                          | F            | 0.56                              | 0.47   | - 0.66 | <0.001  |
| <b>Oxygen Saturation</b> |              |                                   |        |        |         |
|                          | Normal       | REF                               |        |        |         |
|                          | Hypoxic      | 3.11                              | 2.62   | - 3.69 | <0.001  |
| <b>Respiratory Rate</b>  |              |                                   |        |        |         |
|                          | Normal       | REF                               |        |        |         |
|                          | Tachypnea    | 1.92                              | 1.61   | - 2.30 | <0.001  |
| <b>Heart Rate</b>        |              |                                   |        |        |         |
|                          | Normal       | REF                               |        |        |         |
|                          | Tachycardic  | 1.30                              | 1.10   | - 1.54 | 0.002   |
| <b>Blood Pressure</b>    |              |                                   |        |        |         |
|                          | Normotensive | REF                               |        |        |         |
|                          | Hypotensive  | 1.89                              | 1.58   | 2.25   | <0.001  |

|                     |             |      |      |   |        |
|---------------------|-------------|------|------|---|--------|
| Temperature         |             |      |      |   |        |
|                     | Normal      | REF  |      |   |        |
|                     | Hypothermic | 1.96 | 1.65 | - | 2.33   |
|                     | Febrile     | 0.82 | 0.64 | - | 1.05   |
|                     |             |      |      |   | <0.001 |
|                     |             |      |      |   | 0.119  |
| Year                |             |      |      |   |        |
|                     |             | 0.95 | 0.90 | - | 1.01   |
|                     |             |      |      |   | 0.101  |
| Clinical Impression |             |      |      |   |        |
|                     | "Not Sick"  | REF  |      |   |        |
|                     | "Sick"      | 4.20 | 3.31 | - | 5.32   |
|                     | "Toxic"     | 23.2 | 17.1 | - | 31.5   |
|                     |             |      |      |   | <0.001 |
|                     |             |      |      |   | <0.001 |
| Supervision         |             |      |      |   |        |
|                     | Independent | REF  |      |   |        |
|                     | Direct      | 0.79 | 0.45 | - | 1.40   |
|                     | Indirect    | 0.77 | 0.56 | - | 1.05   |
|                     |             |      |      |   | 0.42   |
|                     |             |      |      |   | 0.097  |

**Appendix 2: Odds Ratios for Mortality comparing Direct Supervision and Indirect Supervision to Independent Care**

|                           | OR [95% CI]                               |
|---------------------------|-------------------------------------------|
| <b>3+ Abnormal Vitals</b> |                                           |
| Direct Supervision        | <b>0.61</b> [ <b>0.43</b> - <b>0.85</b> ] |
| Indirect Supervision      | 0.88 [ 0.74 - 1.04 ]                      |
| <b>2 Abnormal Vitals</b>  |                                           |
| Direct Supervision        | 1.63 [ 0.99 - 2.67 ]                      |
| Indirect Supervision      | 1.33 [ 1.02 - 1.73 ]                      |
| <b>1 Abnormal Vital</b>   |                                           |
| Direct Supervision        | 1.35 [ 0.61 - 2.98 ]                      |
| Indirect Supervision      | <b>1.44</b> [ <b>1.04</b> - <b>2.00</b> ] |
| <b>0 Abnormal Vitals</b>  |                                           |
| Direct Supervision        | 2.73 [ 0.80 - 9.26 ]                      |
| Indirect Supervision      | 1.17 [ 0.66 - 2.10 ]                      |

**Bold** indicates statistically significant

**The RECORD statement – checklist of items, extended from the STROBE statement, that should be reported in observational studies using routinely collected health data.**

|                           | Item No. | STROBE items                                                                                                                                                                               | Location in manuscript where items are reported | RECORD items                                                                                                                                                                                                                                                                                                                                                                                                                                | Location in manuscript where items are reported |
|---------------------------|----------|--------------------------------------------------------------------------------------------------------------------------------------------------------------------------------------------|-------------------------------------------------|---------------------------------------------------------------------------------------------------------------------------------------------------------------------------------------------------------------------------------------------------------------------------------------------------------------------------------------------------------------------------------------------------------------------------------------------|-------------------------------------------------|
| <b>Title and abstract</b> |          |                                                                                                                                                                                            |                                                 |                                                                                                                                                                                                                                                                                                                                                                                                                                             |                                                 |
|                           | 1        | (a) Indicate the study's design with a commonly used term in the title or the abstract (b) Provide in the abstract an informative and balanced summary of what was done and what was found |                                                 | RECORD 1.1: The type of data used should be specified in the title or abstract. When possible, the name of the databases used should be included.<br><br>RECORD 1.2: If applicable, the geographic region and timeframe within which the study took place should be reported in the title or abstract.<br><br>RECORD 1.3: If linkage between databases was conducted for the study, this should be clearly stated in the title or abstract. | 1                                               |
| <b>Introduction</b>       |          |                                                                                                                                                                                            |                                                 |                                                                                                                                                                                                                                                                                                                                                                                                                                             |                                                 |
| Background rationale      | 2        | Explain the scientific background and rationale for the investigation being reported                                                                                                       |                                                 |                                                                                                                                                                                                                                                                                                                                                                                                                                             | 3                                               |
| Objectives                | 3        | State specific objectives, including any prespecified hypotheses                                                                                                                           |                                                 |                                                                                                                                                                                                                                                                                                                                                                                                                                             | 5                                               |
| <b>Methods</b>            |          |                                                                                                                                                                                            |                                                 |                                                                                                                                                                                                                                                                                                                                                                                                                                             |                                                 |
| Study Design              | 4        | Present key elements of study design early in the paper                                                                                                                                    |                                                 |                                                                                                                                                                                                                                                                                                                                                                                                                                             | 8                                               |
| Setting                   | 5        | Describe the setting, locations, and relevant dates, including periods of recruitment, exposure, follow-up, and data collection                                                            |                                                 |                                                                                                                                                                                                                                                                                                                                                                                                                                             | 6                                               |



|                                                                                                                                                                                                            |          |                                                                                                                                                                                                                                                                                                                                                                                                                                                                                                                                                                                                                                                                                                                        |  |                                                                                                                                                                                                                                                                                                                                                                                                                                                                                                                                                                                                                                                                                                      |          |
|------------------------------------------------------------------------------------------------------------------------------------------------------------------------------------------------------------|----------|------------------------------------------------------------------------------------------------------------------------------------------------------------------------------------------------------------------------------------------------------------------------------------------------------------------------------------------------------------------------------------------------------------------------------------------------------------------------------------------------------------------------------------------------------------------------------------------------------------------------------------------------------------------------------------------------------------------------|--|------------------------------------------------------------------------------------------------------------------------------------------------------------------------------------------------------------------------------------------------------------------------------------------------------------------------------------------------------------------------------------------------------------------------------------------------------------------------------------------------------------------------------------------------------------------------------------------------------------------------------------------------------------------------------------------------------|----------|
| <p>1<br/>2<br/>3<br/>4<br/>5<br/>6<br/>7<br/>8<br/>9<br/>10<br/>11<br/>12<br/>13<br/>14<br/>15<br/>16<br/>17<br/>18<br/>19<br/>20<br/>21<br/>22<br/>23<br/>24<br/>25<br/>26<br/>27</p> <p>Participants</p> | <p>6</p> | <p>(a) <i>Cohort study</i> - Give the eligibility criteria, and the sources and methods of selection of participants. Describe methods of follow-up<br/> <i>Case-control study</i> - Give the eligibility criteria, and the sources and methods of case ascertainment and control selection. Give the rationale for the choice of cases and controls<br/> <i>Cross-sectional study</i> - Give the eligibility criteria, and the sources and methods of selection of participants</p> <p>(b) <i>Cohort study</i> - For matched studies, give matching criteria and number of exposed and unexposed<br/> <i>Case-control study</i> - For matched studies, give matching criteria and the number of controls per case</p> |  | <p>RECORD 6.1: The methods of study population selection (such as codes or algorithms used to identify subjects) should be listed in detail. If this is not possible, an explanation should be provided.</p> <p>RECORD 6.2: Any validation studies of the codes or algorithms used to select the population should be referenced. If validation was conducted for this study and not published elsewhere, detailed methods and results should be provided.</p> <p>RECORD 6.3: If the study involved linkage of databases, consider use of a flow diagram or other graphical display to demonstrate the data linkage process, including the number of individuals with linked data at each stage.</p> | <p>7</p> |
| <p>28<br/>29<br/>30<br/>31<br/>32<br/>33<br/>34</p> <p>Variables</p>                                                                                                                                       | <p>7</p> | <p>Clearly define all outcomes, exposures, predictors, potential confounders, and effect modifiers. Give diagnostic criteria, if applicable.</p>                                                                                                                                                                                                                                                                                                                                                                                                                                                                                                                                                                       |  | <p>RECORD 7.1: A complete list of codes and algorithms used to classify exposures, outcomes, confounders, and effect modifiers should be provided. If these cannot be reported, an explanation should be provided.</p>                                                                                                                                                                                                                                                                                                                                                                                                                                                                               | <p>7</p> |
| <p>35<br/>36<br/>37<br/>38<br/>39<br/>40<br/>41<br/>42</p> <p>Data sources/<br/>measurement</p>                                                                                                            | <p>8</p> | <p>For each variable of interest, give sources of data and details of methods of assessment (measurement). Describe comparability of assessment methods if there is more than one group</p>                                                                                                                                                                                                                                                                                                                                                                                                                                                                                                                            |  |                                                                                                                                                                                                                                                                                                                                                                                                                                                                                                                                                                                                                                                                                                      | <p>7</p> |

|                                                                                                                                              |                                  |    |                                                                                                                                                                                                                                                                                                                                                                                                                                                                                                                                                                      |                                                                                                                                                       |   |
|----------------------------------------------------------------------------------------------------------------------------------------------|----------------------------------|----|----------------------------------------------------------------------------------------------------------------------------------------------------------------------------------------------------------------------------------------------------------------------------------------------------------------------------------------------------------------------------------------------------------------------------------------------------------------------------------------------------------------------------------------------------------------------|-------------------------------------------------------------------------------------------------------------------------------------------------------|---|
| 1<br>2<br>3<br>4<br>5<br>6<br>7<br>8<br>9<br>10                                                                                              | Bias                             | 9  | Describe any efforts to address potential sources of bias                                                                                                                                                                                                                                                                                                                                                                                                                                                                                                            |                                                                                                                                                       | 7 |
| 11<br>12<br>13<br>14<br>15<br>16<br>17<br>18<br>19<br>20<br>21<br>22<br>23<br>24<br>25<br>26<br>27<br>28<br>29<br>30<br>31<br>32<br>33<br>34 | Study size                       | 10 | Explain how the study size was arrived at                                                                                                                                                                                                                                                                                                                                                                                                                                                                                                                            |                                                                                                                                                       | 7 |
| 35<br>36<br>37<br>38<br>39<br>40<br>41<br>42<br>43<br>44<br>45<br>46<br>47                                                                   | Quantitative variables           | 11 | Explain how quantitative variables were handled in the analyses. If applicable, describe which groupings were chosen, and why                                                                                                                                                                                                                                                                                                                                                                                                                                        |                                                                                                                                                       | 8 |
|                                                                                                                                              | Statistical methods              | 12 | (a) Describe all statistical methods, including those used to control for confounding<br>(b) Describe any methods used to examine subgroups and interactions<br>(c) Explain how missing data were addressed<br>(d) <i>Cohort study</i> - If applicable, explain how loss to follow-up was addressed<br><i>Case-control study</i> - If applicable, explain how matching of cases and controls was addressed<br><i>Cross-sectional study</i> - If applicable, describe analytical methods taking account of sampling strategy<br>(e) Describe any sensitivity analyses |                                                                                                                                                       | 8 |
|                                                                                                                                              | Data access and cleaning methods |    | ..                                                                                                                                                                                                                                                                                                                                                                                                                                                                                                                                                                   | RECORD 12.1: Authors should describe the extent to which the investigators had access to the database population used to create the study population. | 9 |

|                  |    |                                                                                                                                                                                                                                                                                                                                                 |  |                                                                                                                                                                                                                                                                                                                    |     |
|------------------|----|-------------------------------------------------------------------------------------------------------------------------------------------------------------------------------------------------------------------------------------------------------------------------------------------------------------------------------------------------|--|--------------------------------------------------------------------------------------------------------------------------------------------------------------------------------------------------------------------------------------------------------------------------------------------------------------------|-----|
|                  |    |                                                                                                                                                                                                                                                                                                                                                 |  | RECORD 12.2: Authors should provide information on the data cleaning methods used in the study.                                                                                                                                                                                                                    |     |
| Linkage          |    | ..                                                                                                                                                                                                                                                                                                                                              |  | RECORD 12.3: State whether the study included person-level, institutional-level, or other data linkage across two or more databases. The methods of linkage and methods of linkage quality evaluation should be provided.                                                                                          | n/a |
| <b>Results</b>   |    |                                                                                                                                                                                                                                                                                                                                                 |  |                                                                                                                                                                                                                                                                                                                    |     |
| Participants     | 13 | (a) Report the numbers of individuals at each stage of the study ( <i>e.g.</i> , numbers potentially eligible, examined for eligibility, confirmed eligible, included in the study, completing follow-up, and analysed)<br>(b) Give reasons for non-participation at each stage.<br>(c) Consider use of a flow diagram                          |  | RECORD 13.1: Describe in detail the selection of the persons included in the study ( <i>i.e.</i> , study population selection) including filtering based on data quality, data availability and linkage. The selection of included persons can be described in the text and/or by means of the study flow diagram. | 9   |
| Descriptive data | 14 | (a) Give characteristics of study participants ( <i>e.g.</i> , demographic, clinical, social) and information on exposures and potential confounders<br>(b) Indicate the number of participants with missing data for each variable of interest<br>(c) <i>Cohort study</i> - summarise follow-up time ( <i>e.g.</i> , average and total amount) |  |                                                                                                                                                                                                                                                                                                                    | 10  |
| Outcome data     | 15 | <i>Cohort study</i> - Report numbers of outcome events or summary measures over time<br><i>Case-control study</i> - Report numbers in each exposure                                                                                                                                                                                             |  |                                                                                                                                                                                                                                                                                                                    | 11  |

1  
2  
3  
4  
5  
6  
7  
8  
9  
10  
11  
12  
13  
14  
15  
16  
17  
18  
19  
20  
21  
22  
23  
24  
25  
26  
27  
28  
29  
30  
31  
32  
33  
34  
35  
36  
37  
38  
39  
40  
41  
42  
43  
44  
45  
46  
47

|                   |    |                                                                                                                                                                                                                                                                                                                                                                                                                 |  |                                                                                                                                                                                                                                                                                                          |    |
|-------------------|----|-----------------------------------------------------------------------------------------------------------------------------------------------------------------------------------------------------------------------------------------------------------------------------------------------------------------------------------------------------------------------------------------------------------------|--|----------------------------------------------------------------------------------------------------------------------------------------------------------------------------------------------------------------------------------------------------------------------------------------------------------|----|
|                   |    | category, or summary measures of exposure<br><i>Cross-sectional study</i> - Report numbers of outcome events or summary measures                                                                                                                                                                                                                                                                                |  |                                                                                                                                                                                                                                                                                                          |    |
| Main results      | 16 | (a) Give unadjusted estimates and, if applicable, confounder-adjusted estimates and their precision (e.g., 95% confidence interval). Make clear which confounders were adjusted for and why they were included<br>(b) Report category boundaries when continuous variables were categorized<br>(c) If relevant, consider translating estimates of relative risk into absolute risk for a meaningful time period |  |                                                                                                                                                                                                                                                                                                          | 11 |
| Other analyses    | 17 | Report other analyses done— e.g., analyses of subgroups and interactions, and sensitivity analyses                                                                                                                                                                                                                                                                                                              |  |                                                                                                                                                                                                                                                                                                          | 15 |
| <b>Discussion</b> |    |                                                                                                                                                                                                                                                                                                                                                                                                                 |  |                                                                                                                                                                                                                                                                                                          |    |
| Key results       | 18 | Summarise key results with reference to study objectives                                                                                                                                                                                                                                                                                                                                                        |  |                                                                                                                                                                                                                                                                                                          | 15 |
| Limitations       | 19 | Discuss limitations of the study, taking into account sources of potential bias or imprecision. Discuss both direction and magnitude of any potential bias                                                                                                                                                                                                                                                      |  | RECORD 19.1: Discuss the implications of using data that were not created or collected to answer the specific research question(s). Include discussion of misclassification bias, unmeasured confounding, missing data, and changing eligibility over time, as they pertain to the study being reported. | 19 |
| Interpretation    | 20 | Give a cautious overall interpretation of results considering objectives,                                                                                                                                                                                                                                                                                                                                       |  |                                                                                                                                                                                                                                                                                                          | 20 |

|                                                           |    |                                                                                                                                                               |  |                                                                                                                                                          |     |
|-----------------------------------------------------------|----|---------------------------------------------------------------------------------------------------------------------------------------------------------------|--|----------------------------------------------------------------------------------------------------------------------------------------------------------|-----|
|                                                           |    | limitations, multiplicity of analyses, results from similar studies, and other relevant evidence                                                              |  |                                                                                                                                                          |     |
| Generalisability                                          | 21 | Discuss the generalisability (external validity) of the study results                                                                                         |  |                                                                                                                                                          | 19  |
| <b>Other Information</b>                                  |    |                                                                                                                                                               |  |                                                                                                                                                          |     |
| Funding                                                   | 22 | Give the source of funding and the role of the funders for the present study and, if applicable, for the original study on which the present article is based |  |                                                                                                                                                          | n/a |
| Accessibility of protocol, raw data, and programming code |    | ..                                                                                                                                                            |  | RECORD 22.1: Authors should provide information on how to access any supplemental information such as the study protocol, raw data, or programming code. | n/a |

\*Reference: Benchimol EI, Smeeth L, Guttman A, Harron K, Moher D, Petersen I, Sørensen HT, von Elm E, Langan SM, the RECORD Working Committee. The REporting of studies Conducted using Observational Routinely-collected health Data (RECORD) Statement. *PLoS Medicine* 2015; in press.

\*Checklist is protected under Creative Commons Attribution ([CC BY](https://creativecommons.org/licenses/by/4.0/)) license.
