# Supplementary material for: Emergency medicine physician supervision and mortality among patients receiving care from non-physician clinicians in a task-sharing model of emergency care in rural Uganda: a retrospective analysis of a single-centre training programme
Source: HighWire-hosted journal article supplement (doi:10.1136/bmjopen-2021-059859), 2022-06-01
Supplement: bmjopen-2021-059859supp001_data_supplement.pdf [file bmjopen-2021-059859supp001_data_supplement.pdf]

**APPENDIX 1: Odds Ratios for Mortality comparing Direct Supervision and Indirect Supervision to Independent Care (Complete Case Analysis)**

|                          |              | Complete Case Analysis (n=26,869) |        |        |         |
|--------------------------|--------------|-----------------------------------|--------|--------|---------|
|                          |              | OR                                | 95% CI |        | p-Value |
| <b>Age Group</b>         |              |                                   |        |        |         |
|                          | Under 5      | 0.60                              | 0.33   | - 1.10 | 0.1     |
|                          | 5-12 y.o.    | 0.52                              | 0.37   | - 0.72 | <0.001  |
|                          | 18-64 y.o.   | REF                               |        |        |         |
|                          | >=65 y.o.    | 1.59                              | 1.31   | - 1.91 | <0.001  |
| <b>HIV</b>               |              |                                   |        |        |         |
|                          | Negative     | REF                               |        |        |         |
|                          | Positive     | 1.75                              | 1.40   | - 2.19 | <0.001  |
| <b>Malaria</b>           |              |                                   |        |        |         |
|                          | Negative     | REF                               |        |        |         |
|                          | Positive     | 1.08                              | 0.85   | - 1.36 | 0.546   |
| <b>Gender</b>            |              |                                   |        |        |         |
|                          | M            | REF                               |        |        |         |
|                          | F            | 0.56                              | 0.47   | - 0.66 | <0.001  |
| <b>Oxygen Saturation</b> |              |                                   |        |        |         |
|                          | Normal       | REF                               |        |        |         |
|                          | Hypoxic      | 3.11                              | 2.62   | - 3.69 | <0.001  |
| <b>Respiratory Rate</b>  |              |                                   |        |        |         |
|                          | Normal       | REF                               |        |        |         |
|                          | Tachypnea    | 1.92                              | 1.61   | - 2.30 | <0.001  |
| <b>Heart Rate</b>        |              |                                   |        |        |         |
|                          | Normal       | REF                               |        |        |         |
|                          | Tachycardic  | 1.30                              | 1.10   | - 1.54 | 0.002   |
| <b>Blood Pressure</b>    |              |                                   |        |        |         |
|                          | Normotensive | REF                               |        |        |         |
|                          | Hypotensive  | 1.89                              | 1.58   | 2.25   | <0.001  |

|                     |      |      |   |      |        |
|---------------------|------|------|---|------|--------|
| Temperature         |      |      |   |      |        |
| Normal              | REF  |      |   |      |        |
| Hypothermic         | 1.96 | 1.65 | - | 2.33 | <0.001 |
| Febrile             | 0.82 | 0.64 | - | 1.05 | 0.119  |
| Year                | 0.95 | 0.90 | - | 1.01 | 0.101  |
| Clinical Impression |      |      |   |      |        |
| "Not Sick"          | REF  |      |   |      |        |
| "Sick"              | 4.20 | 3.31 | - | 5.32 | <0.001 |
| "Toxic"             | 23.2 | 17.1 | - | 31.5 | <0.001 |
| Supervision         |      |      |   |      |        |
| Independent         | REF  |      |   |      |        |
| Direct              | 0.79 | 0.45 | - | 1.40 | 0.42   |
| Indirect            | 0.77 | 0.56 | - | 1.05 | 0.097  |
