# Supplementary material for: Emergency medicine physician supervision and mortality among patients receiving care from non-physician clinicians in a task-sharing model of emergency care in rural Uganda: a retrospective analysis of a single-centre training programme
Source: HighWire-hosted journal article supplement (doi:10.1136/bmjopen-2021-059859), 2022-06-01
Supplement: bmjopen-2021-059859supp002_data_supplement.pdf [file bmjopen-2021-059859supp002_data_supplement.pdf]

### Appendix 2: Odds Ratios for Mortality comparing Direct Supervision and Indirect Supervision to Independent Care

|                    |                      | OR [95% CI]                               |
|--------------------|----------------------|-------------------------------------------|
| 3+ Abnormal Vitals | Direct Supervision   | <b>0.61</b> [ <b>0.43</b> - <b>0.85</b> ] |
|                    | Indirect Supervision | 0.88 [ 0.74 - 1.04 ]                      |
| 2 Abnormal Vitals  | Direct Supervision   | 1.63 [ 0.99 - 2.67 ]                      |
|                    | Indirect Supervision | 1.33 [ 1.02 - 1.73 ]                      |
| 1 Abnormal Vital   | Direct Supervision   | 1.35 [ 0.61 - 2.98 ]                      |
|                    | Indirect Supervision | <b>1.44</b> [ <b>1.04</b> - <b>2.00</b> ] |
| 0 Abnormal Vitals  | Direct Supervision   | 2.73 [ 0.80 - 9.26 ]                      |
|                    | Indirect Supervision | 1.17 [ 0.66 - 2.10 ]                      |

**Bold** indicates statistically significant
